# Supplementary material
Source: PubMed Central journal article supplement (PMC2522302)

Supporting Information Available For:

## **Preparation of a Psammaplysene-Based Library**

Savvas N. Georgiades and Jon Clardy

Department of Biological Chemistry and Molecular Pharmacology,

Harvard Medical School, Boston, MA 02115

[jon\\_clardy@hms.harvard.edu](mailto:jon_clardy@hms.harvard.edu)

### **TABLE OF CONTENTS**

|                                                                             |       |
|-----------------------------------------------------------------------------|-------|
| Table of final products .....                                               | SB-2  |
| <sup>1</sup> H-NMR spectra of representative intermediates .....            | SB-4  |
| <sup>1</sup> H-NMR spectra of all final products .....                      | SB-13 |
| <sup>13</sup> C-NMR spectra of final products prepared on large scale ..... | SB-27 |
| HMQC/HMBC-NMR spectra of final products prepared on small scale .....       | SB-38 |

# TABLE OF FINAL PRODUCTS

| Structure                                                                           | Acid BB | Amine BB | Structure                                                                            | Acid BB | Amine BB |
|-------------------------------------------------------------------------------------|---------|----------|--------------------------------------------------------------------------------------|---------|----------|
| 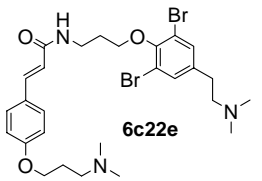   | 6c      | 22e      |    | 14c     | 22e      |
|    | 8c      | 22e      |    | 15c     | 22e      |
|    | 9c      | 22e      |    | 16c     | 22e      |
|   | 10c     | 22e      |   | 17c     | 22e      |
|  | 11c     | 22e      |  | 18c     | 22e      |
|  | 12c     | 22e      |  | 19c     | 22e      |
|  | 13c     | 22e      |  | 20c     | 22e      |

| Structure                                                                           | Acid BB | Amine BB | Structure                                                                            | Acid BB | Amine BB |
|-------------------------------------------------------------------------------------|---------|----------|--------------------------------------------------------------------------------------|---------|----------|
| 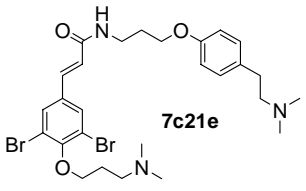   | 7c      | 21e      |    | 7c      | 29e      |
|    | 7c      | 23e      |    | 7c      | 30e      |
|    | 7c      | 24e      |    | 7c      | 31e      |
|   | 7c      | 25e      |   | 7c      | 32e      |
|  | 7c      | 26e      |  | 7c      | 33e      |
|  | 7c      | 27e      |  | 7c      | 34e      |
|  | 7c      | 28e      |  | 7c      | 35e      |

# <sup>1</sup>H-NMR SPECTRA OF REPRESENTATIVE INTERMEDIATES

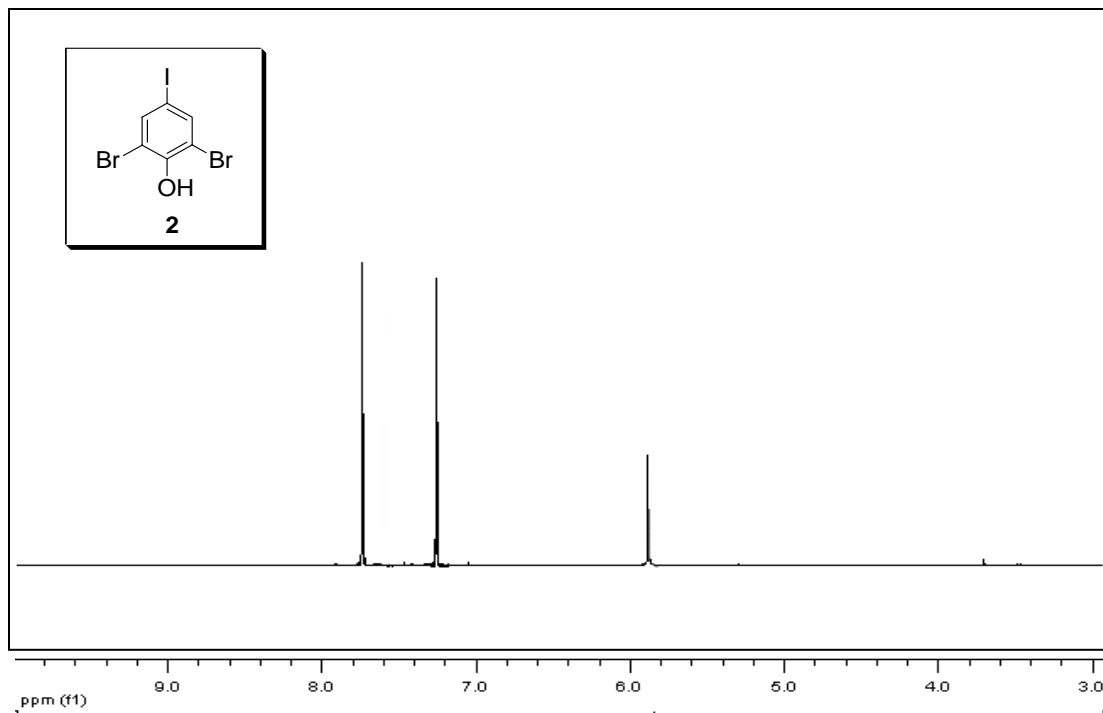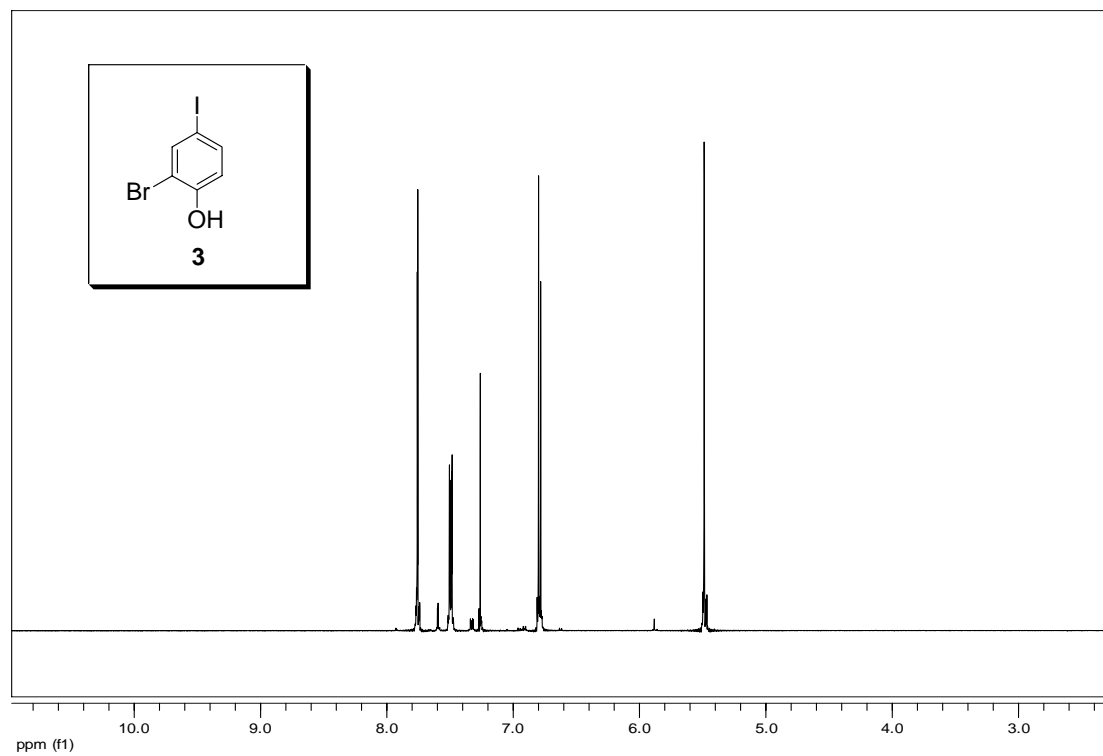

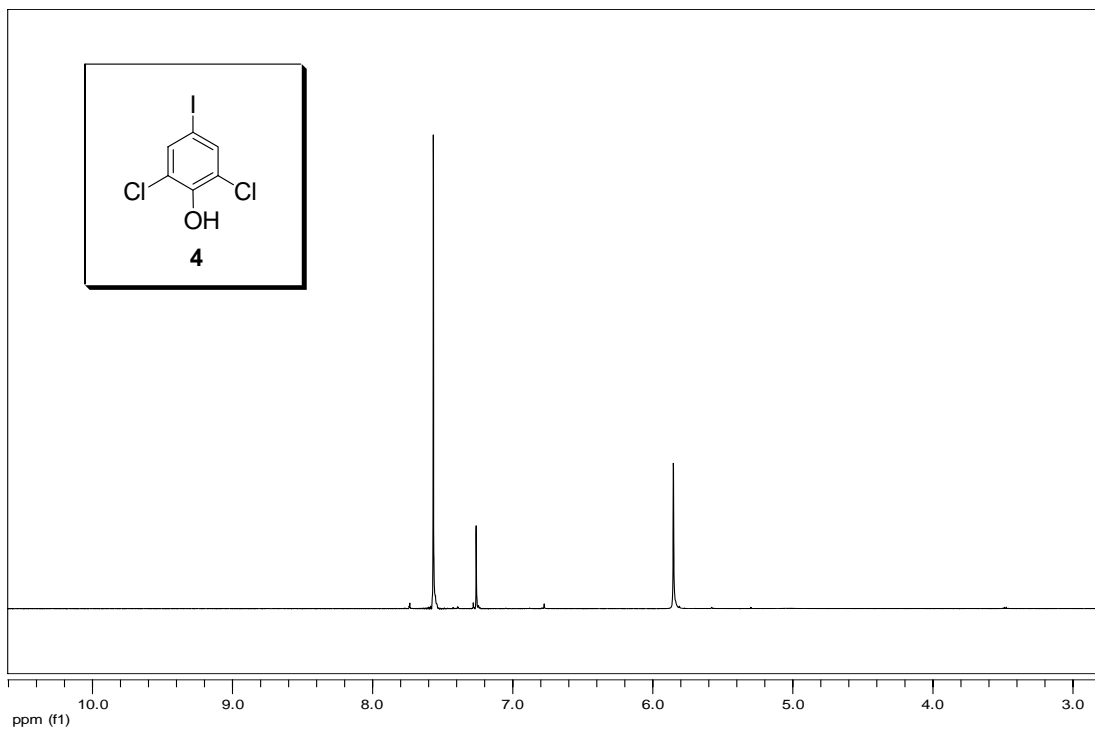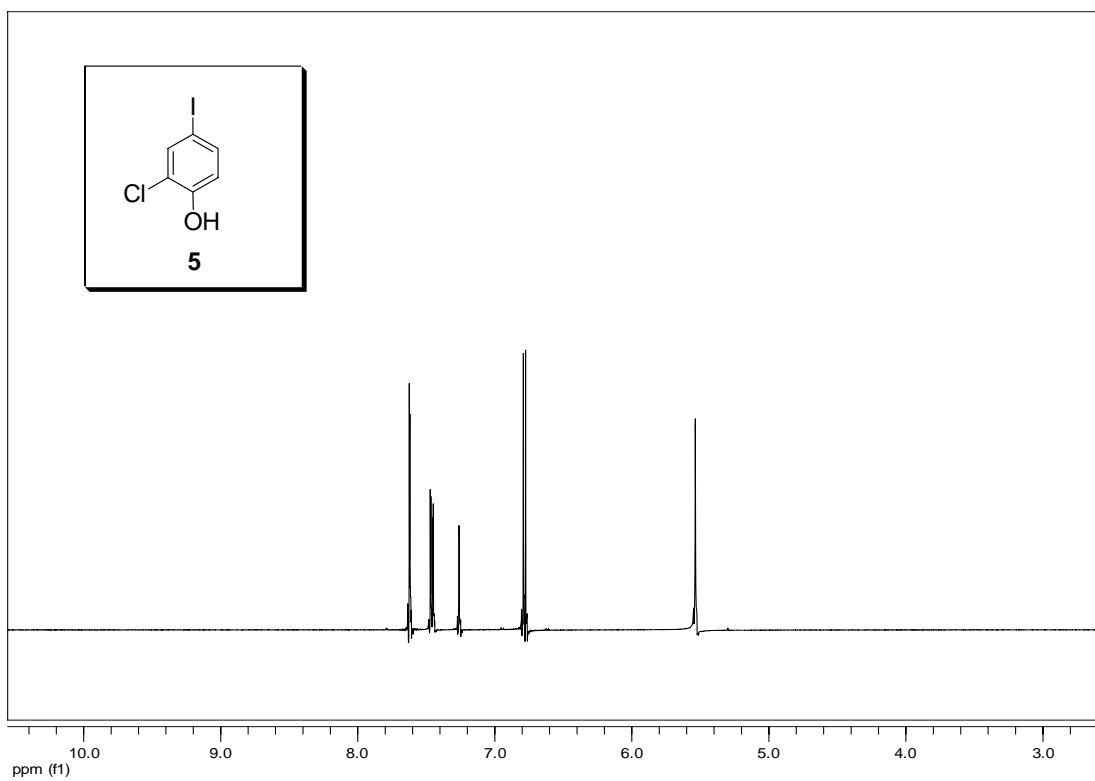

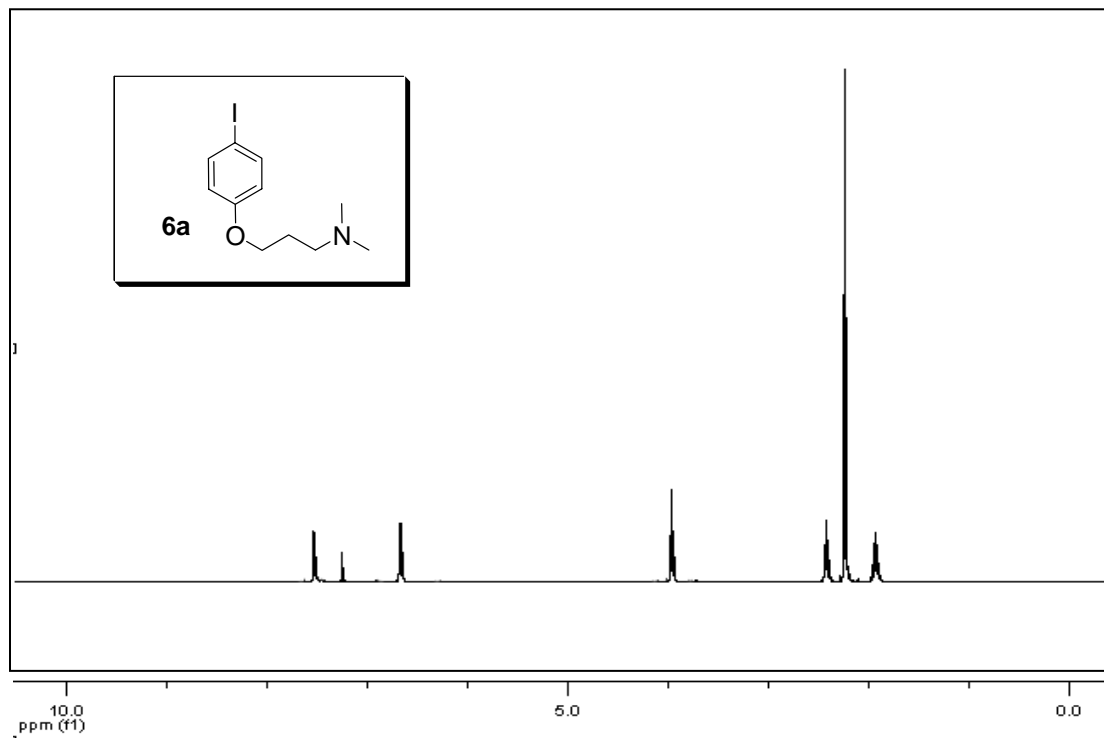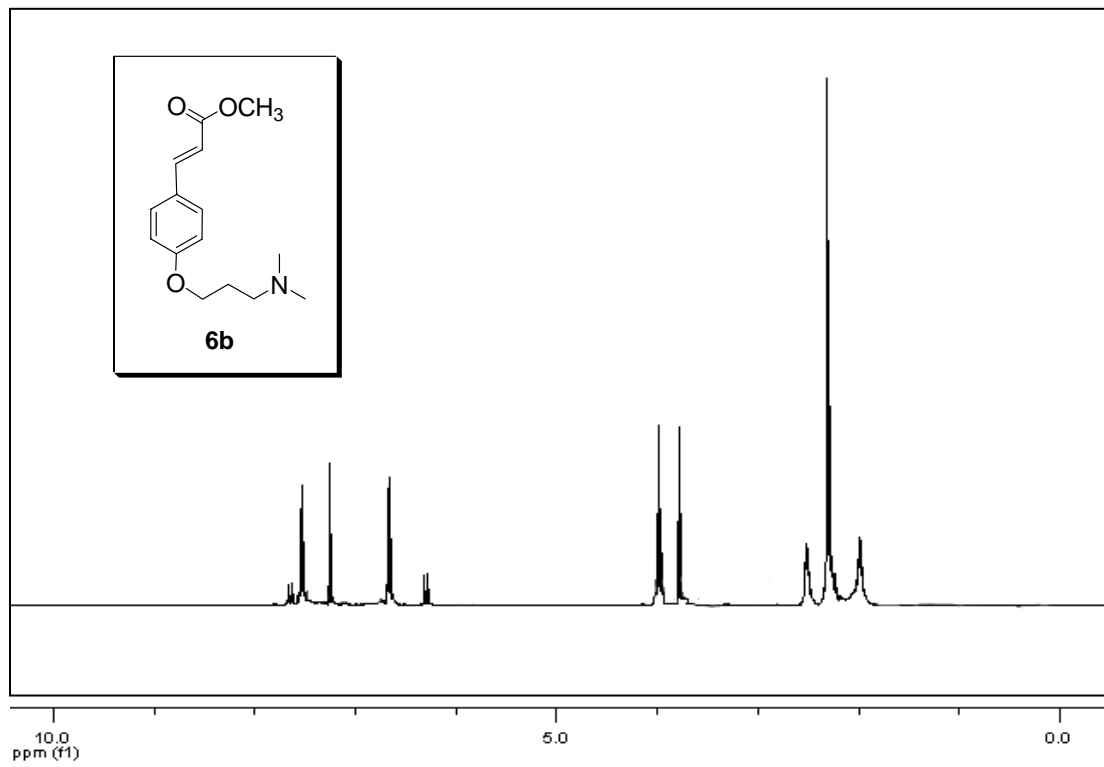

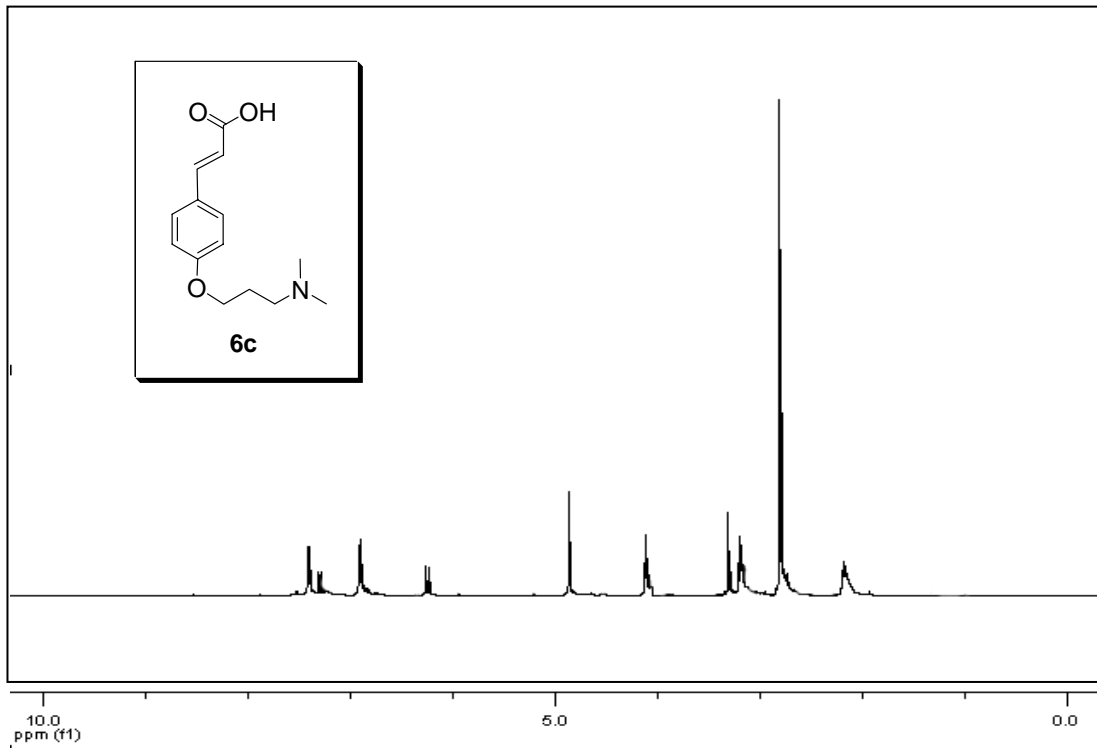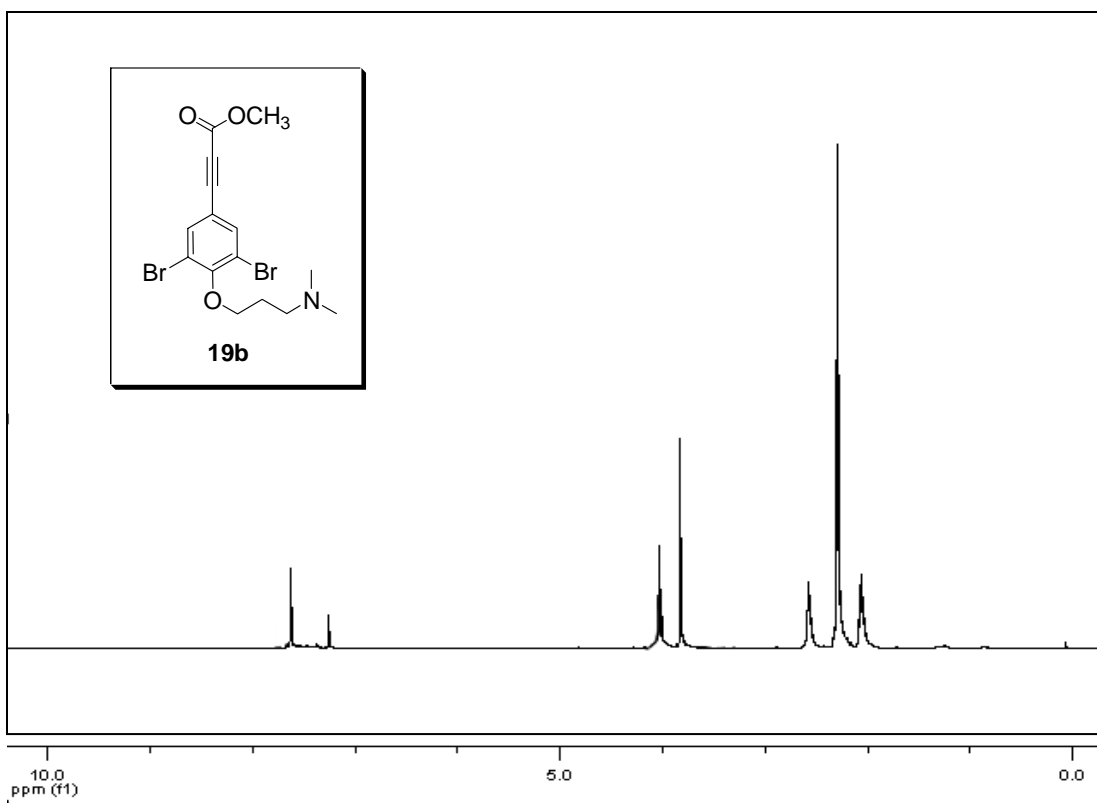

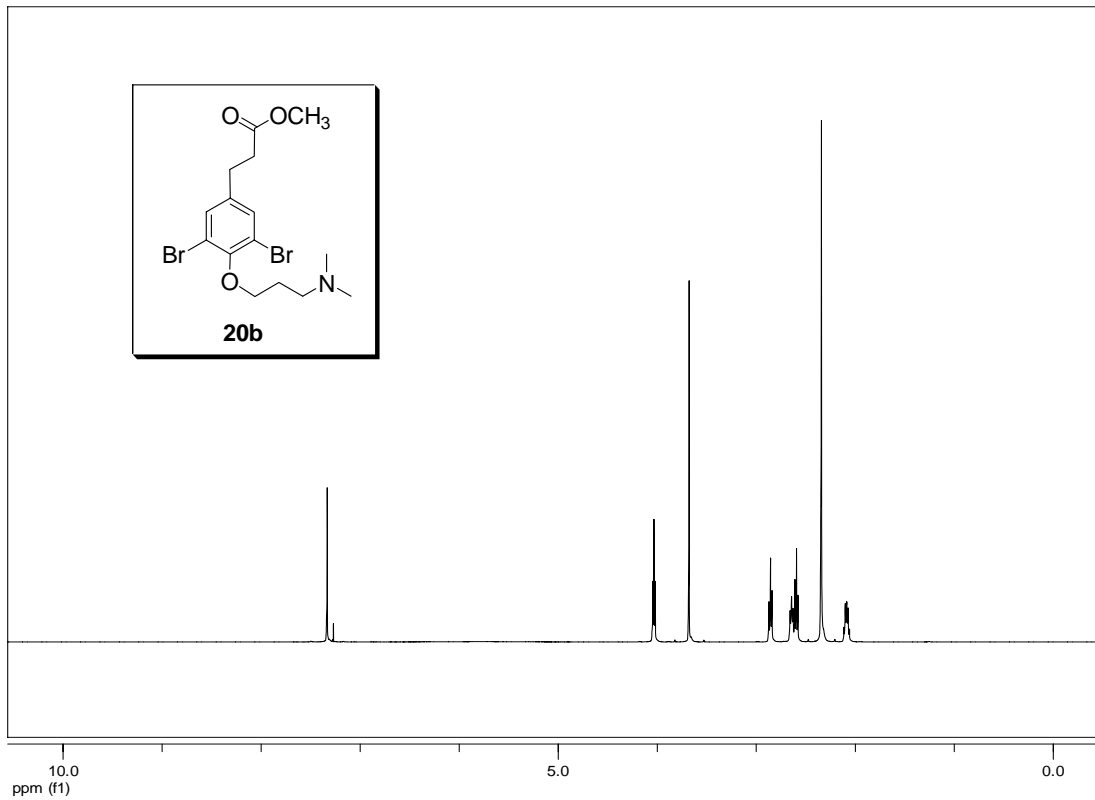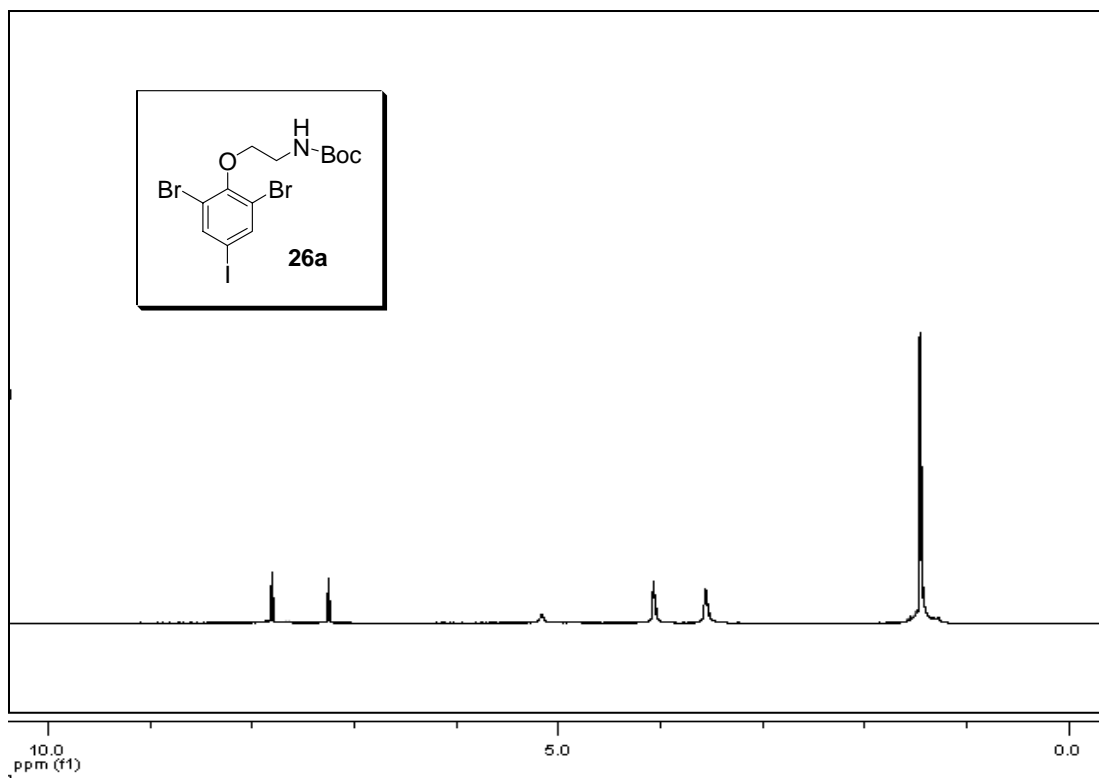



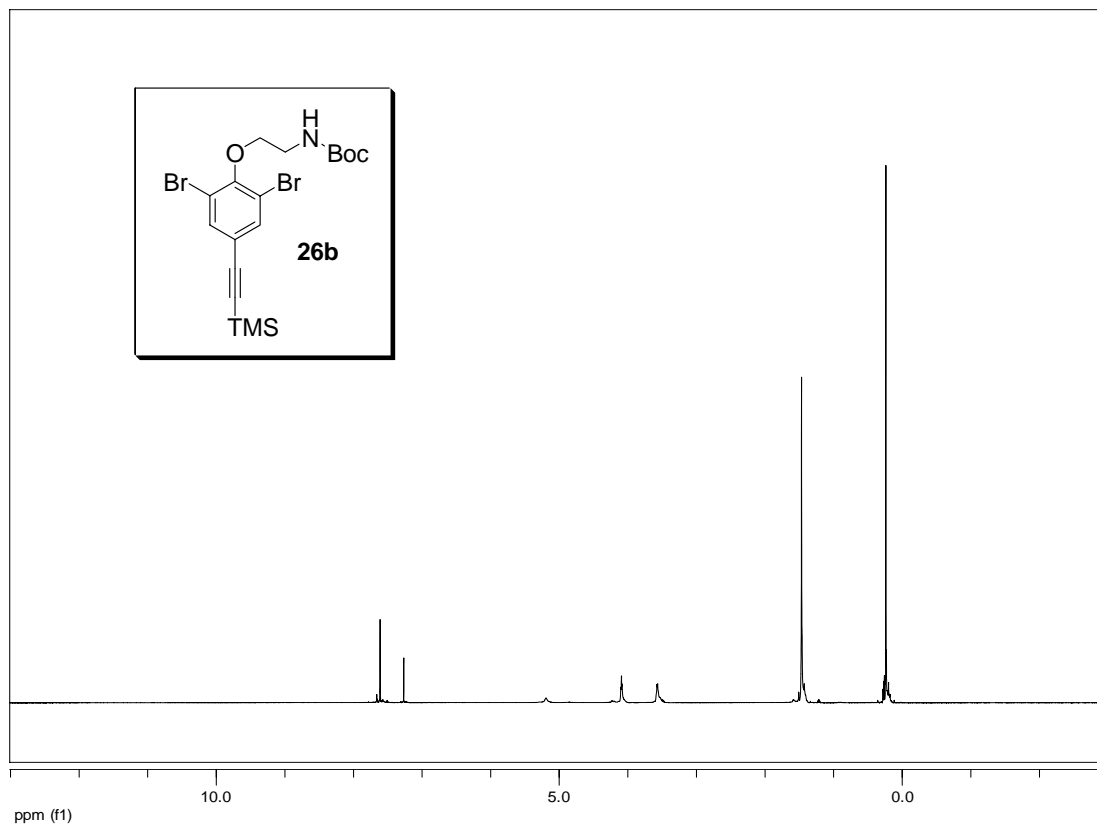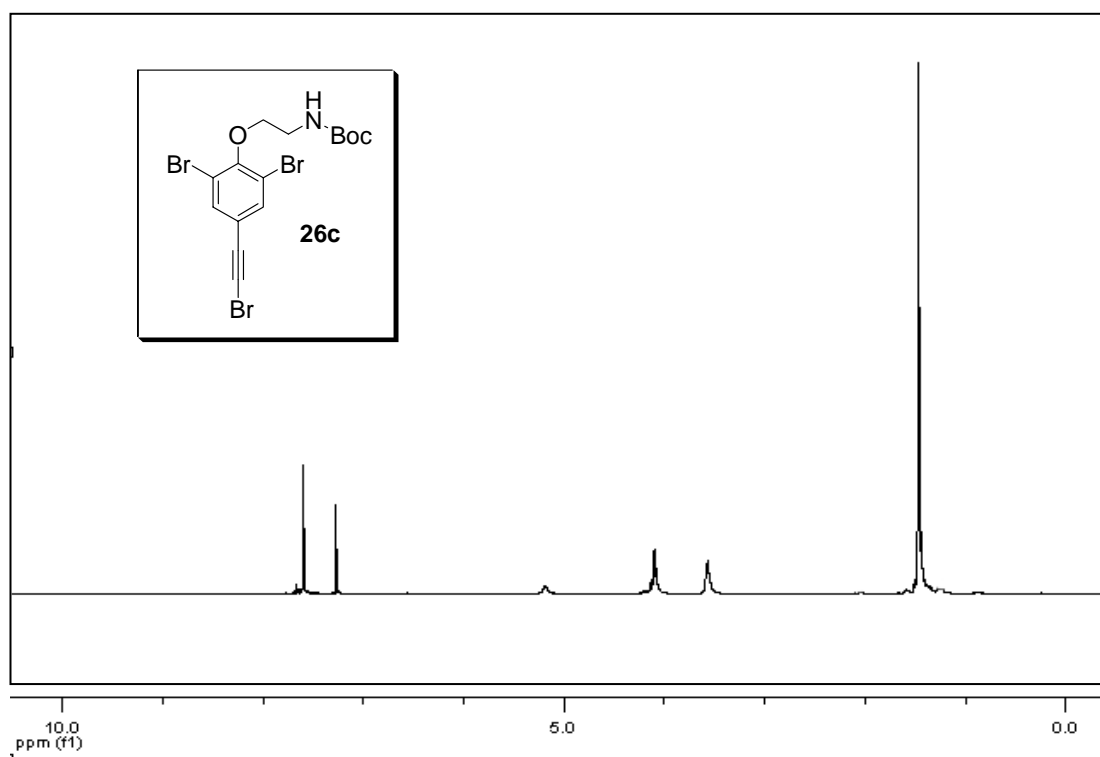

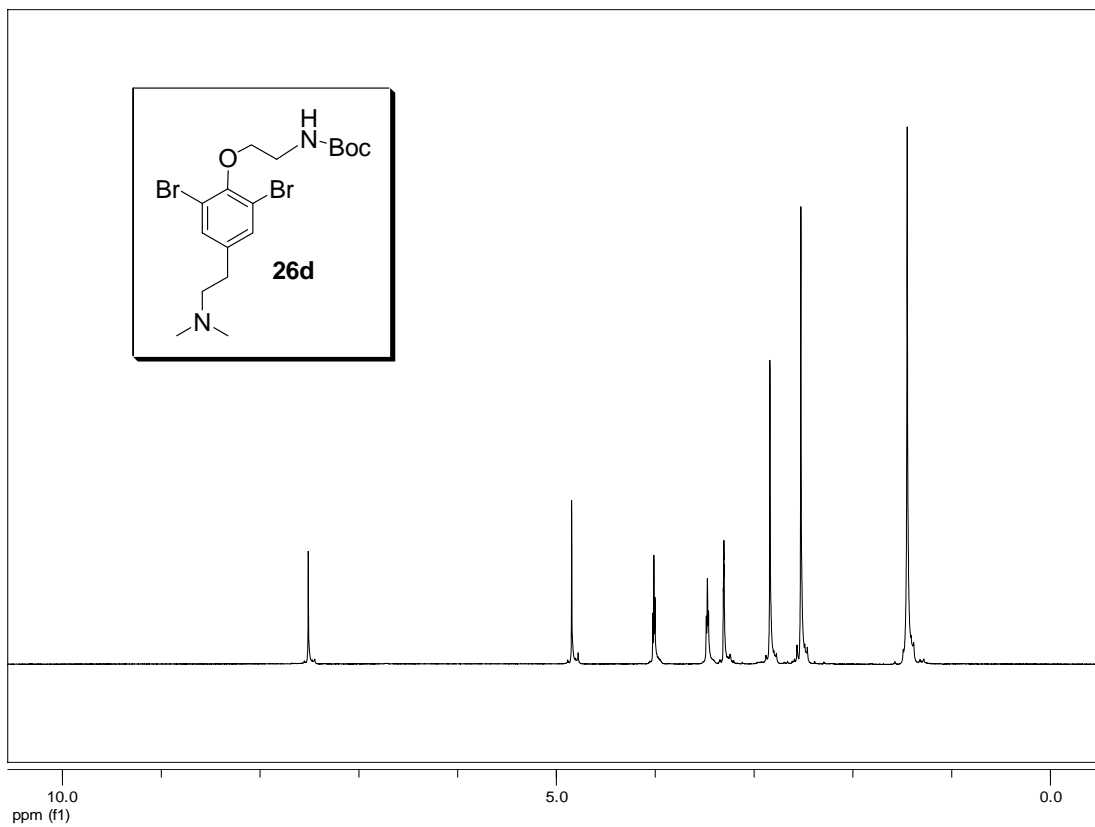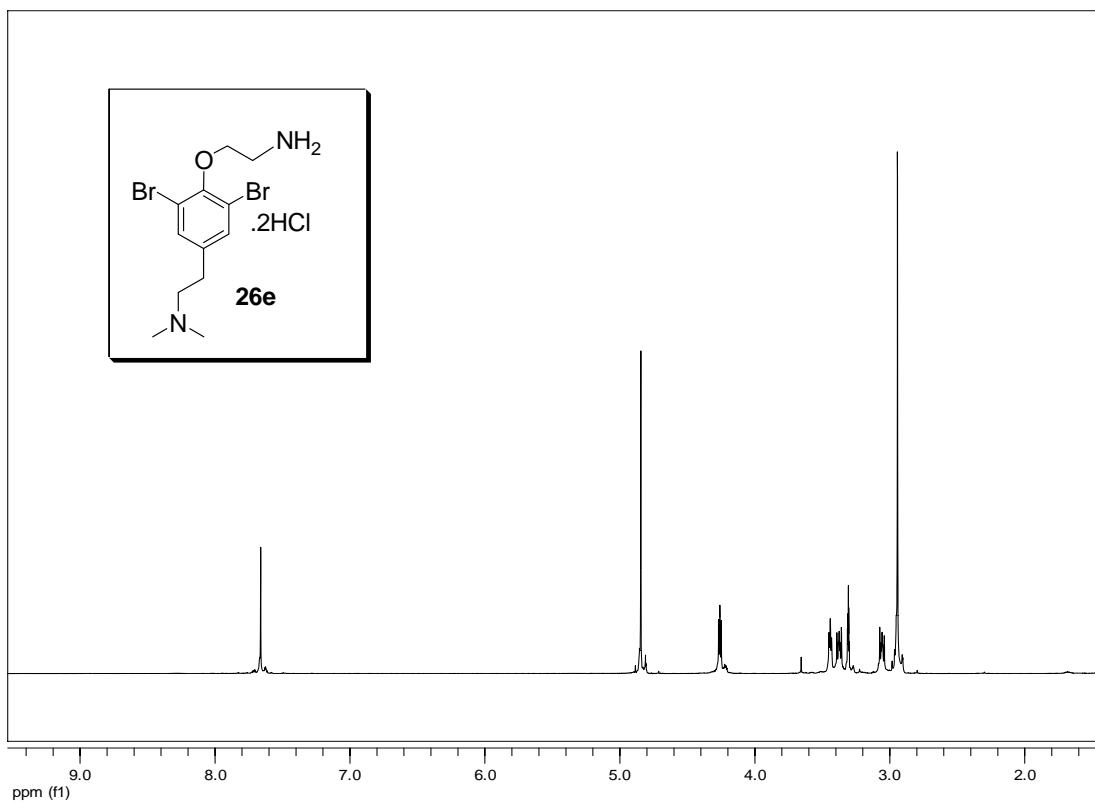

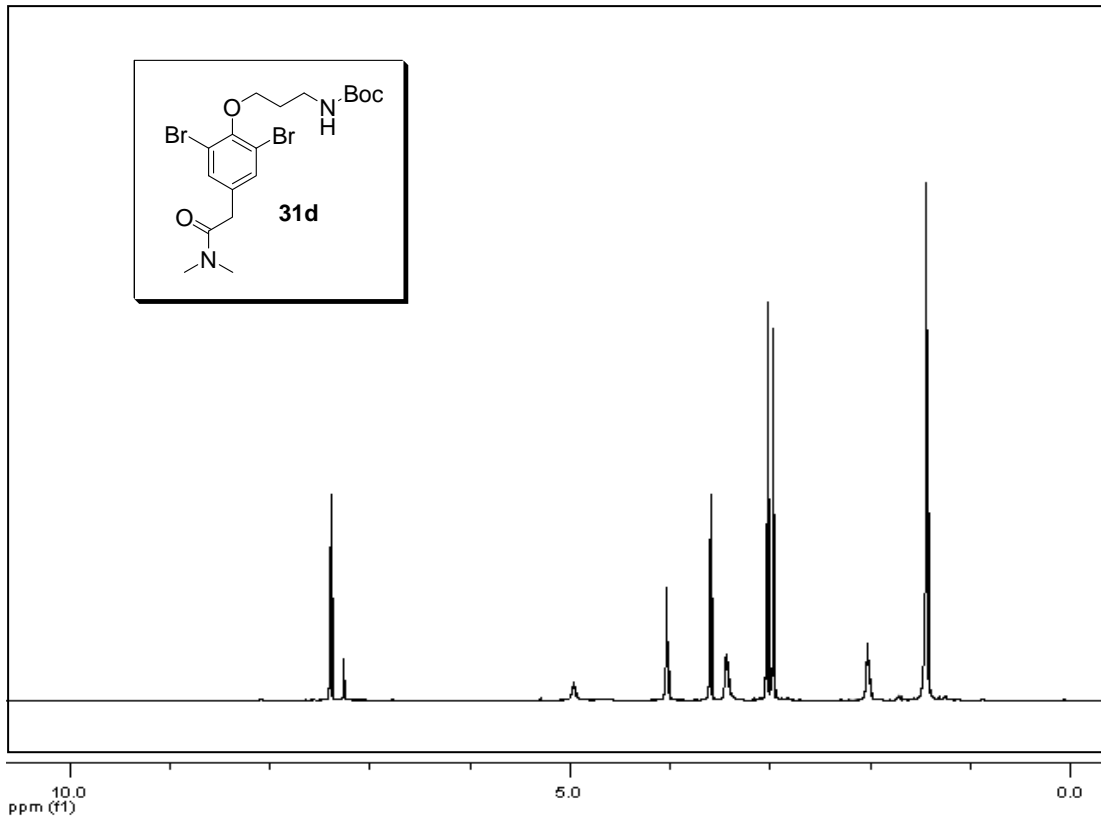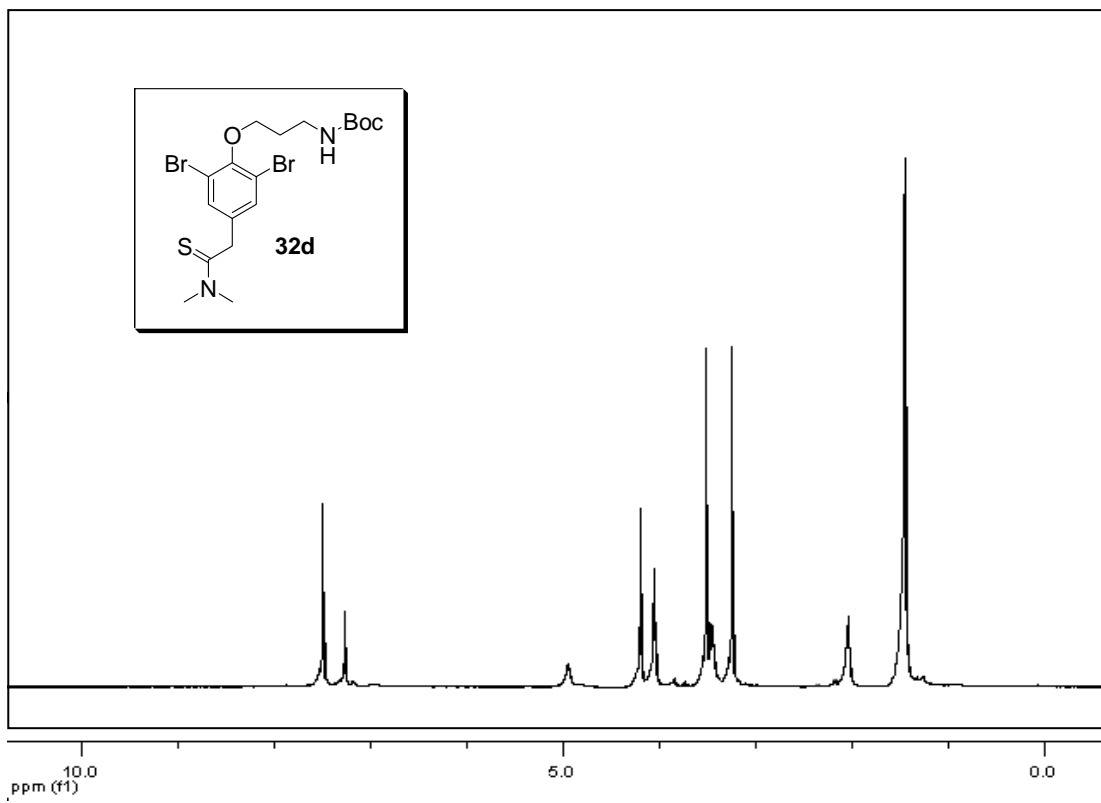

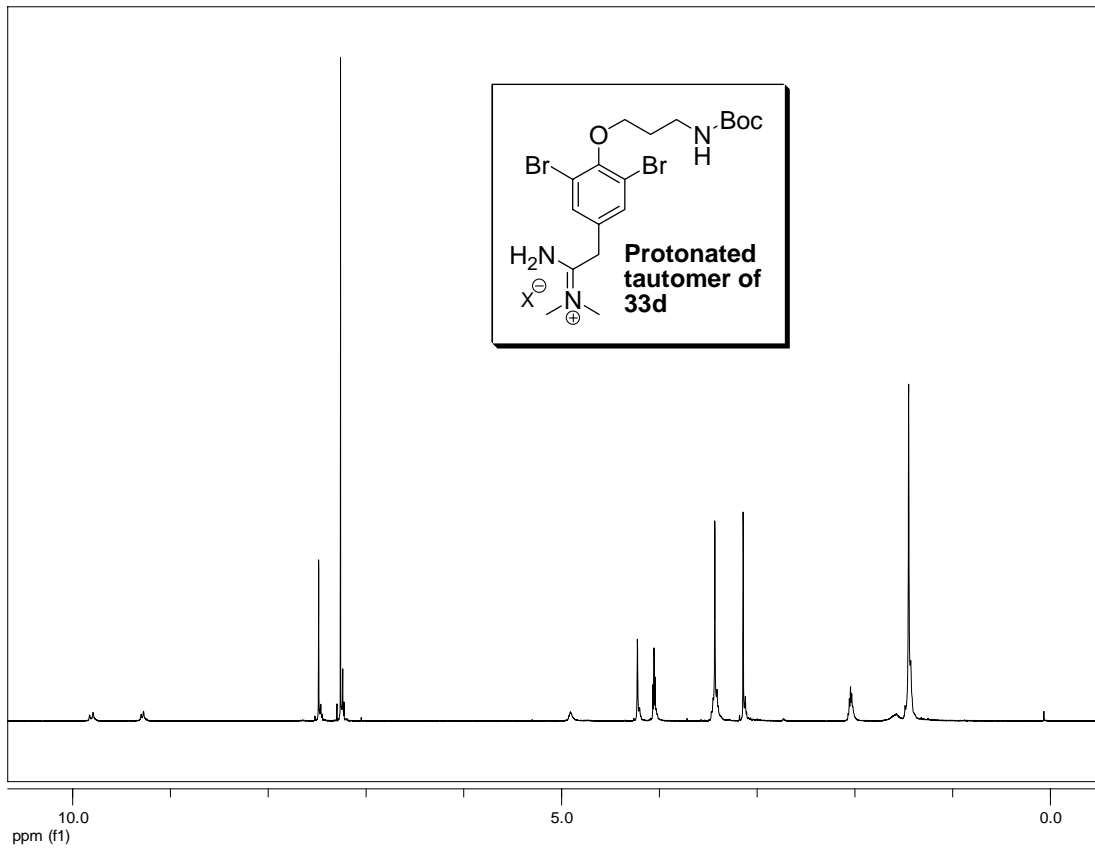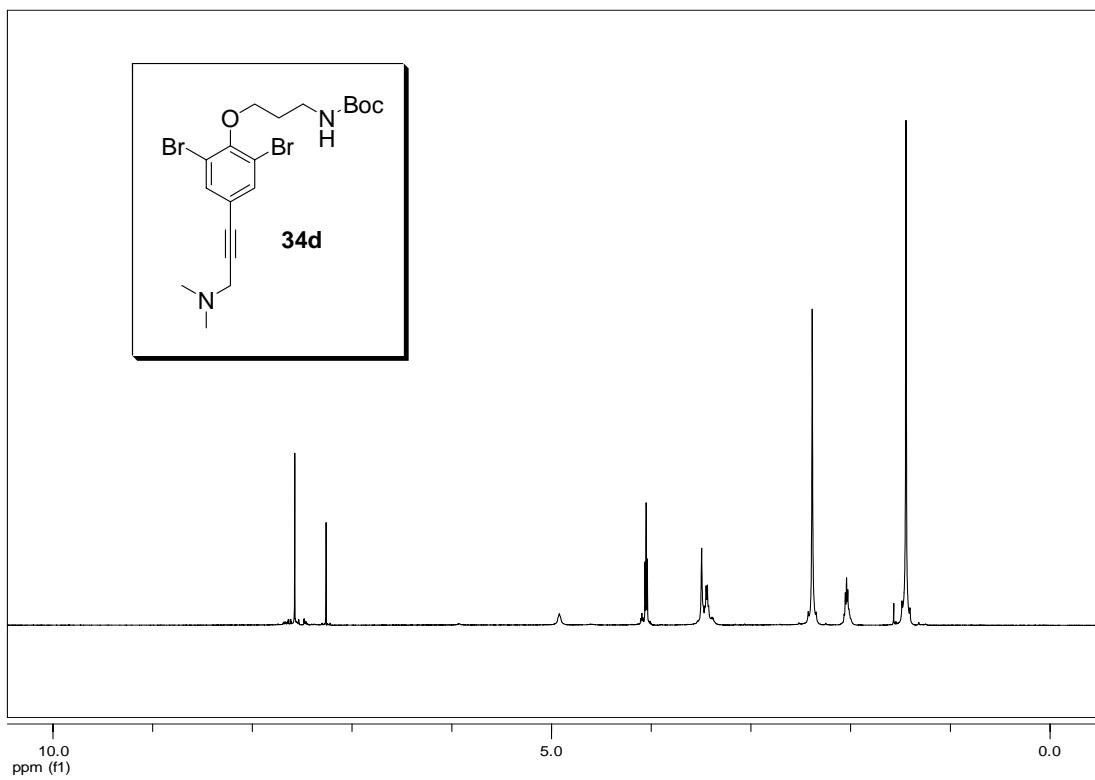

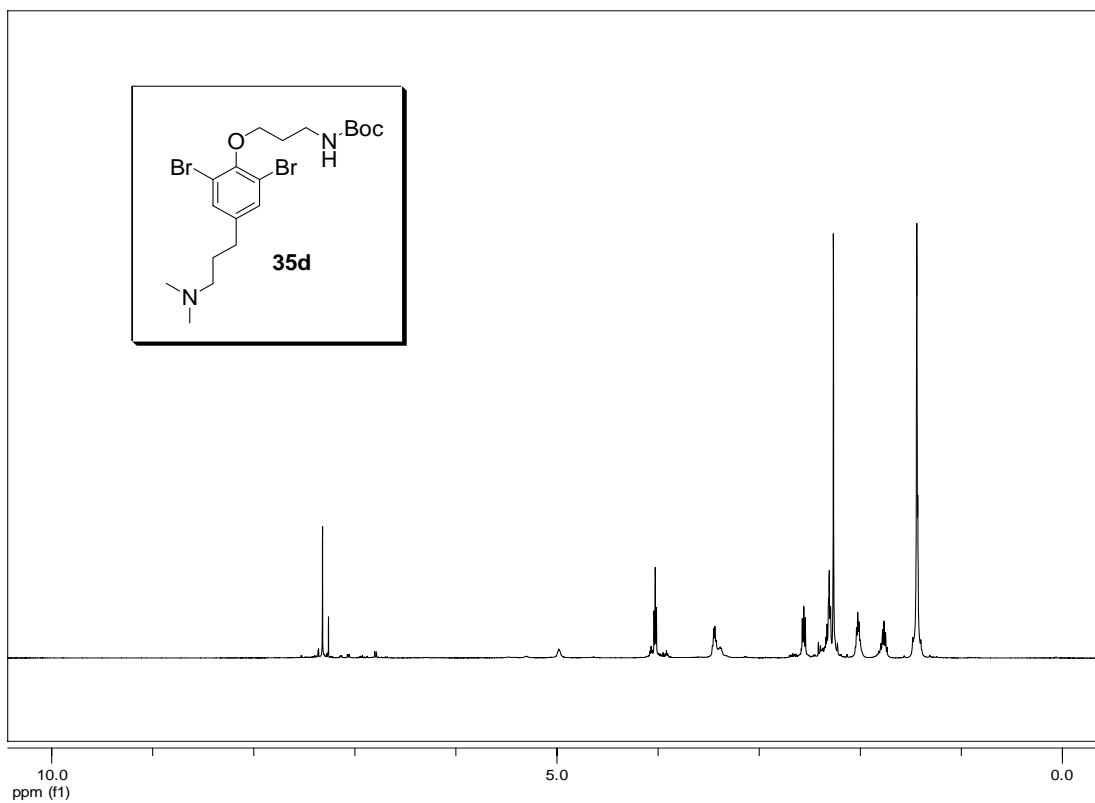

### <sup>1</sup>H-NMR SPECTRA OF ALL FINAL PRODUCTS

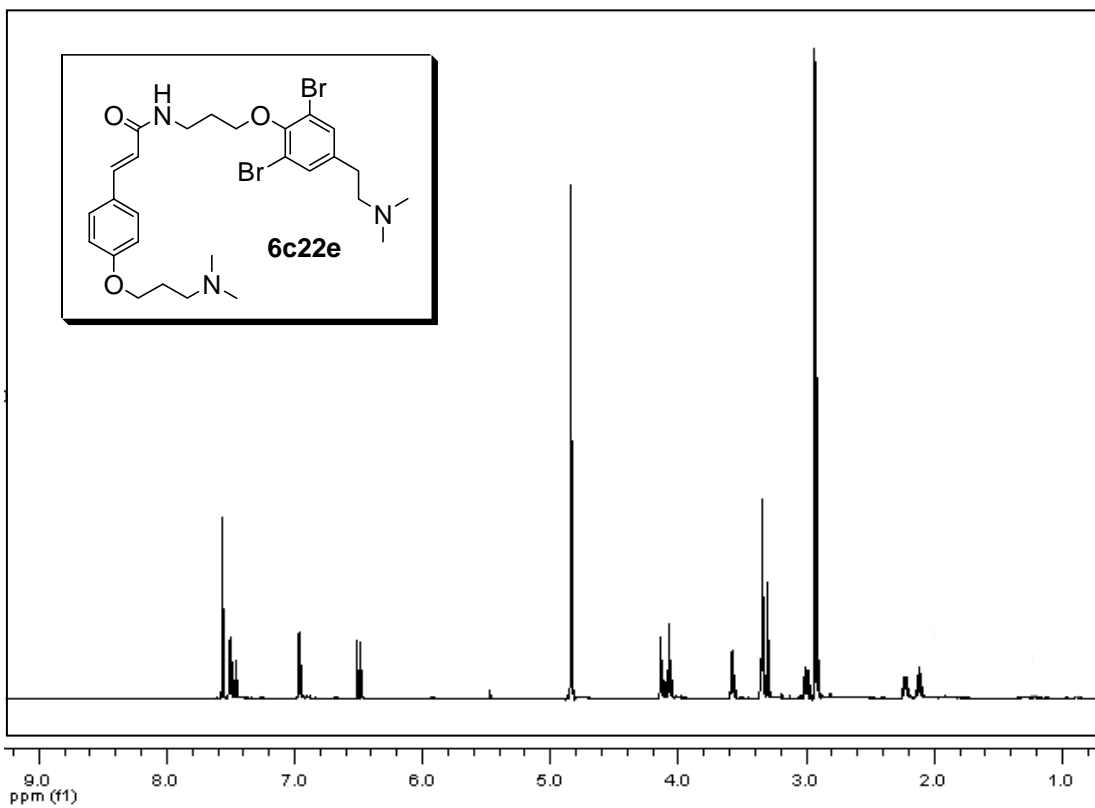

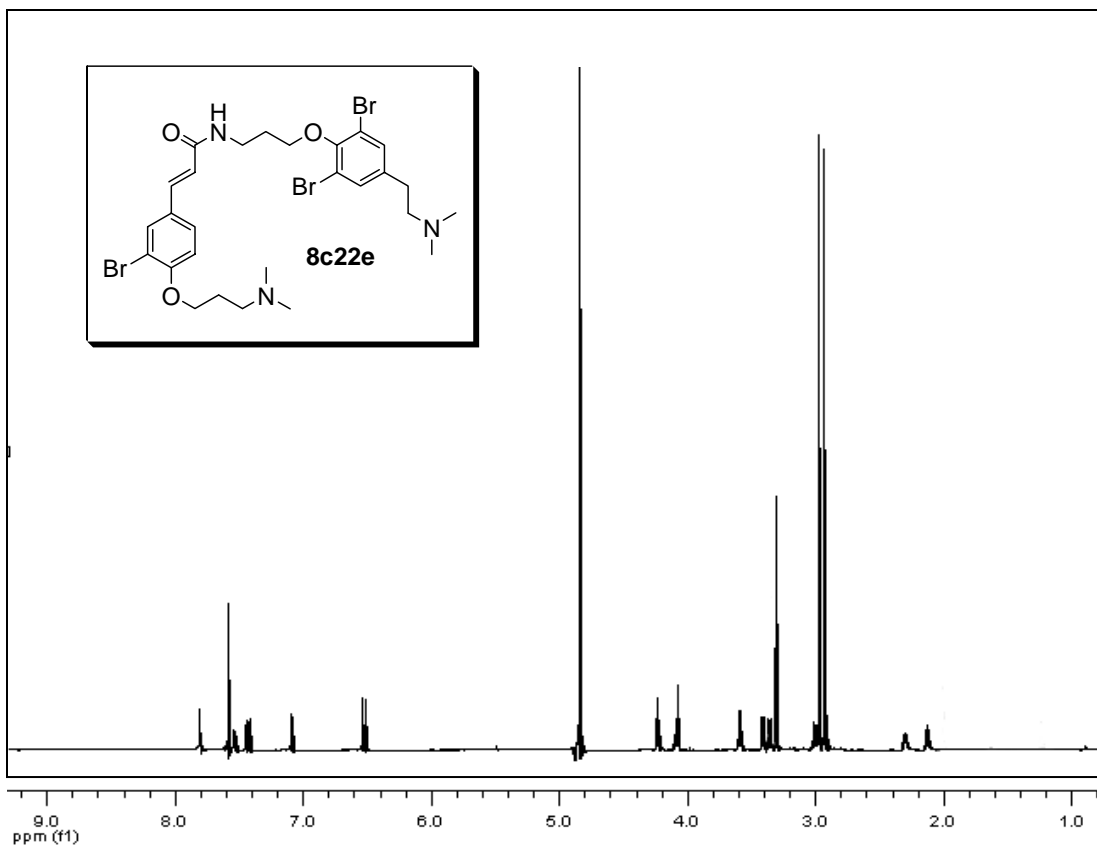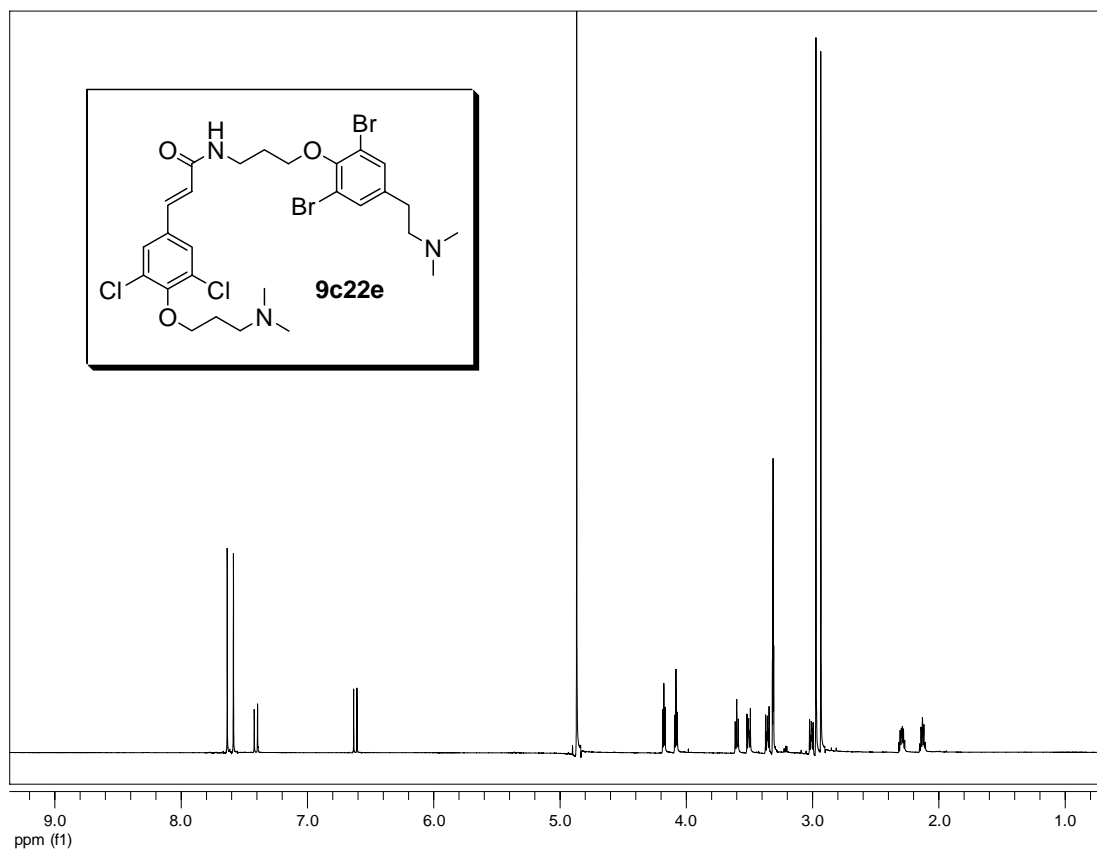

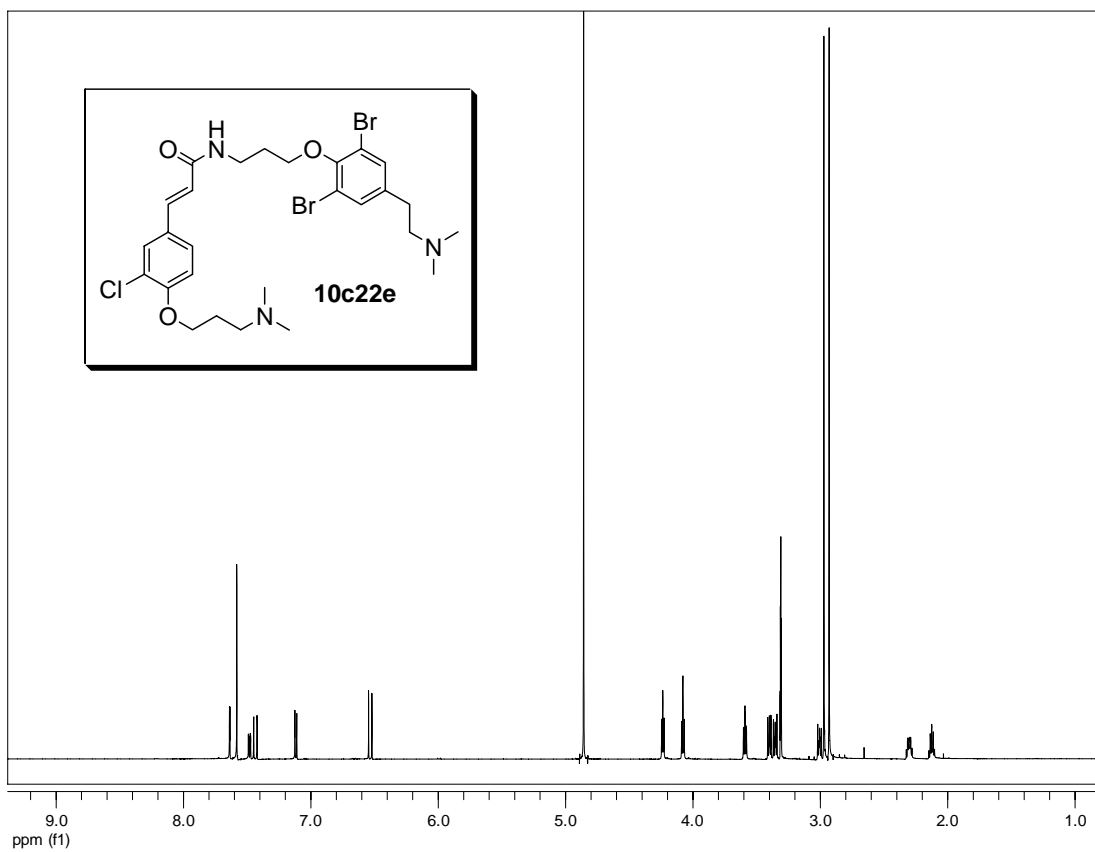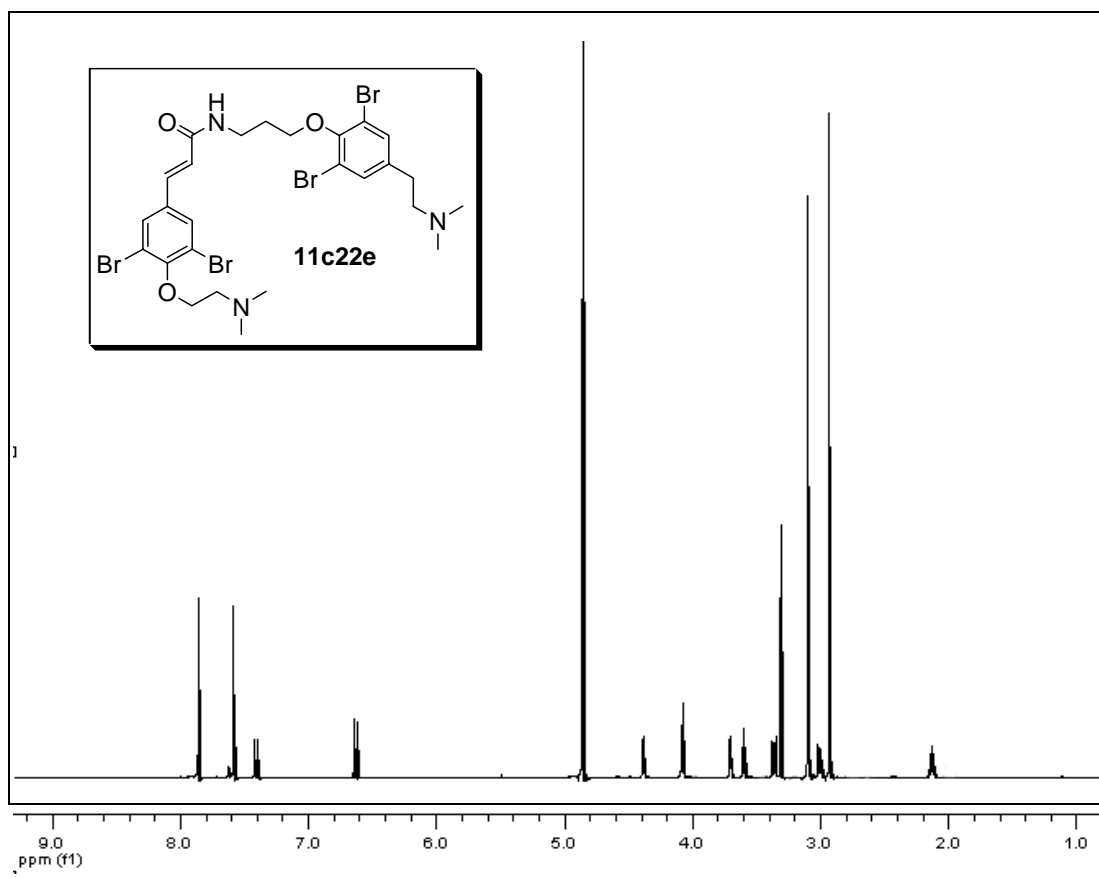

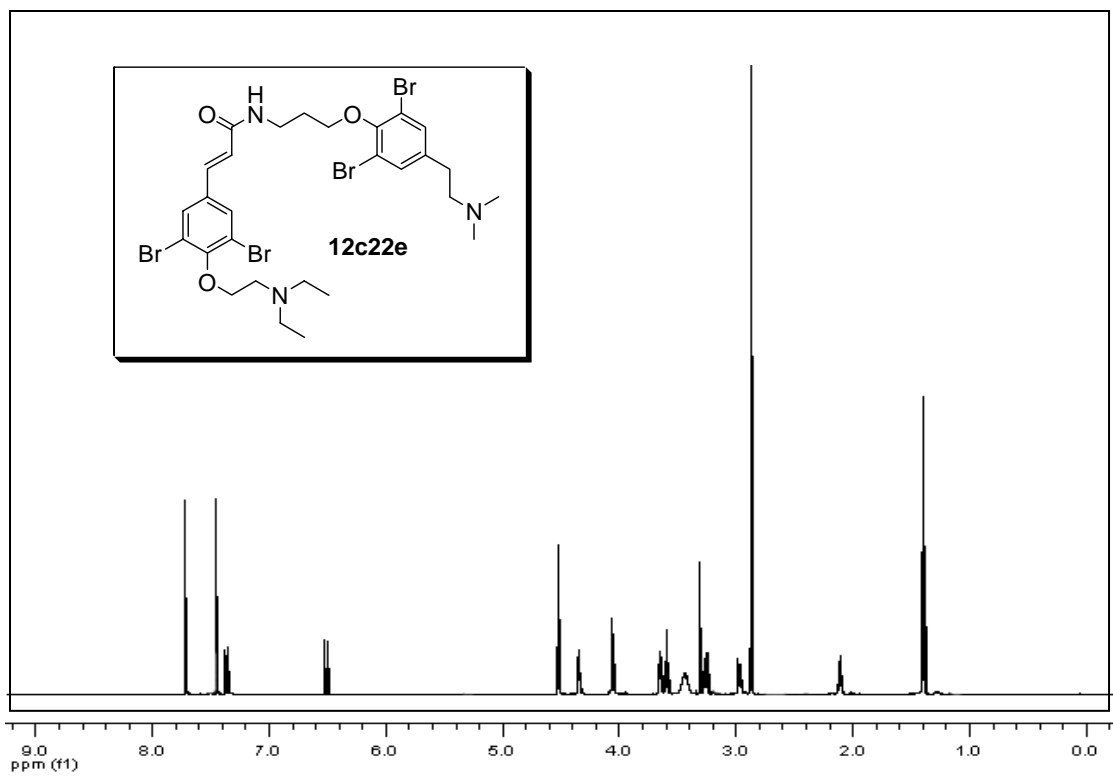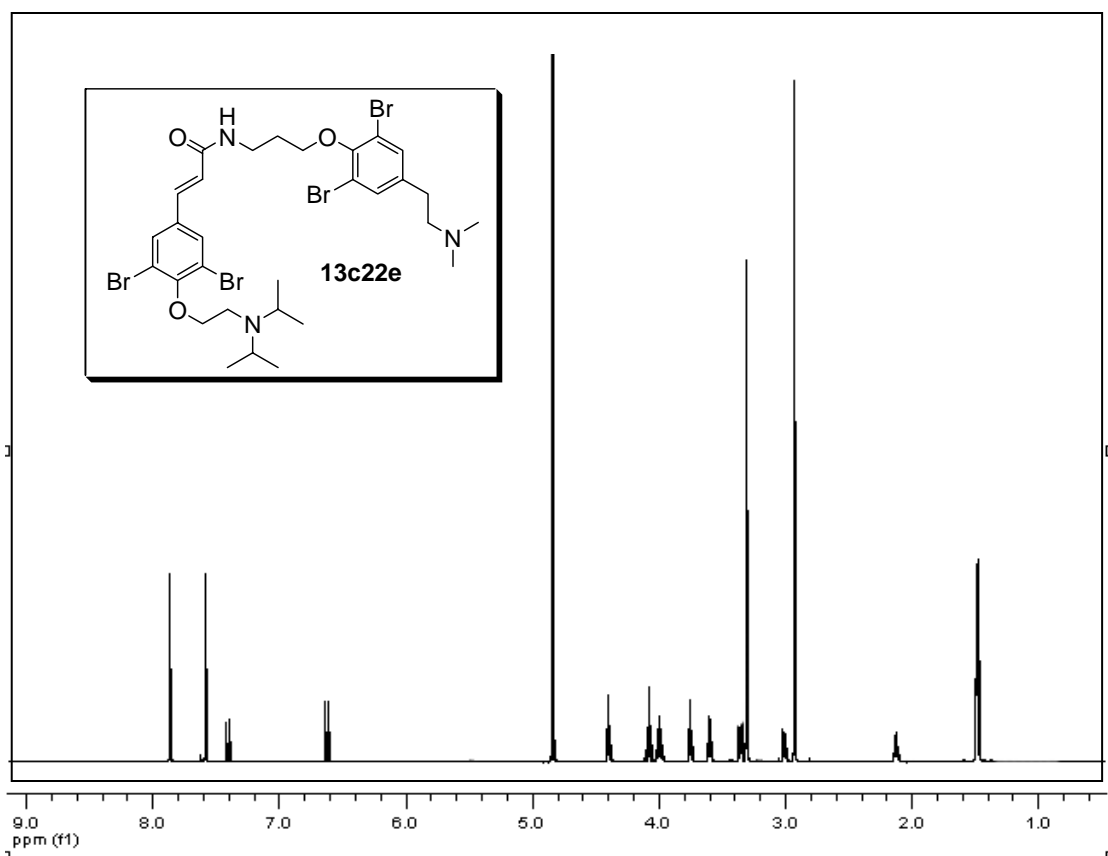



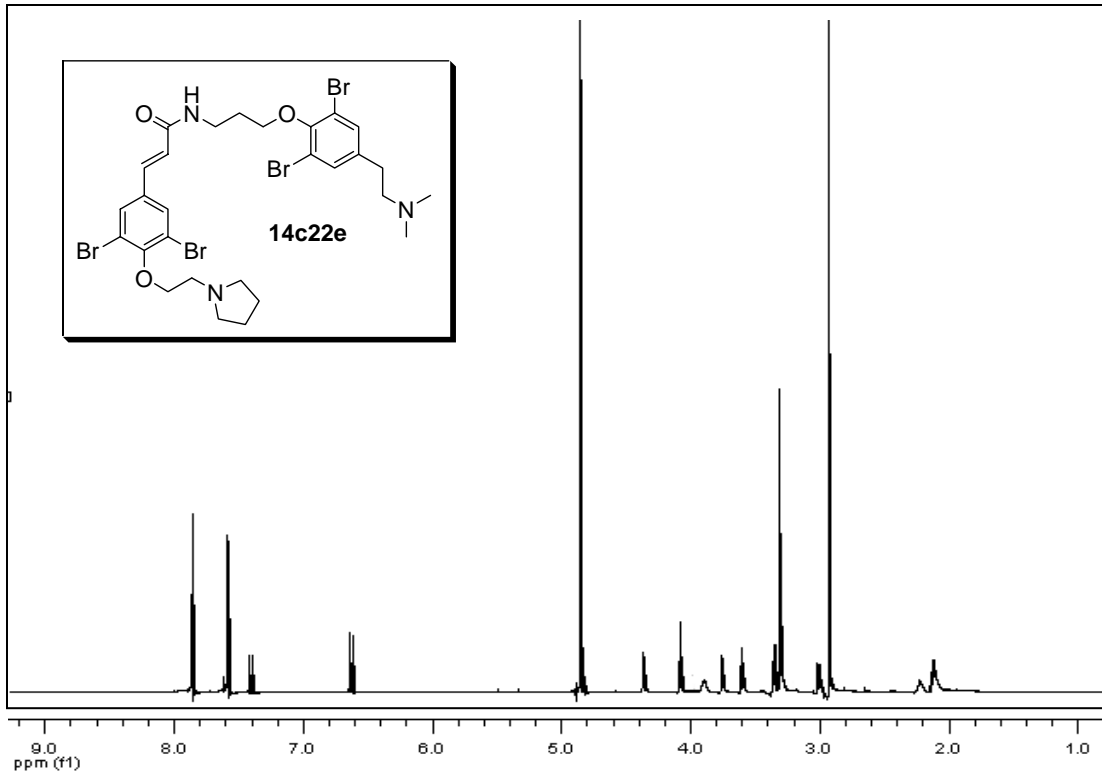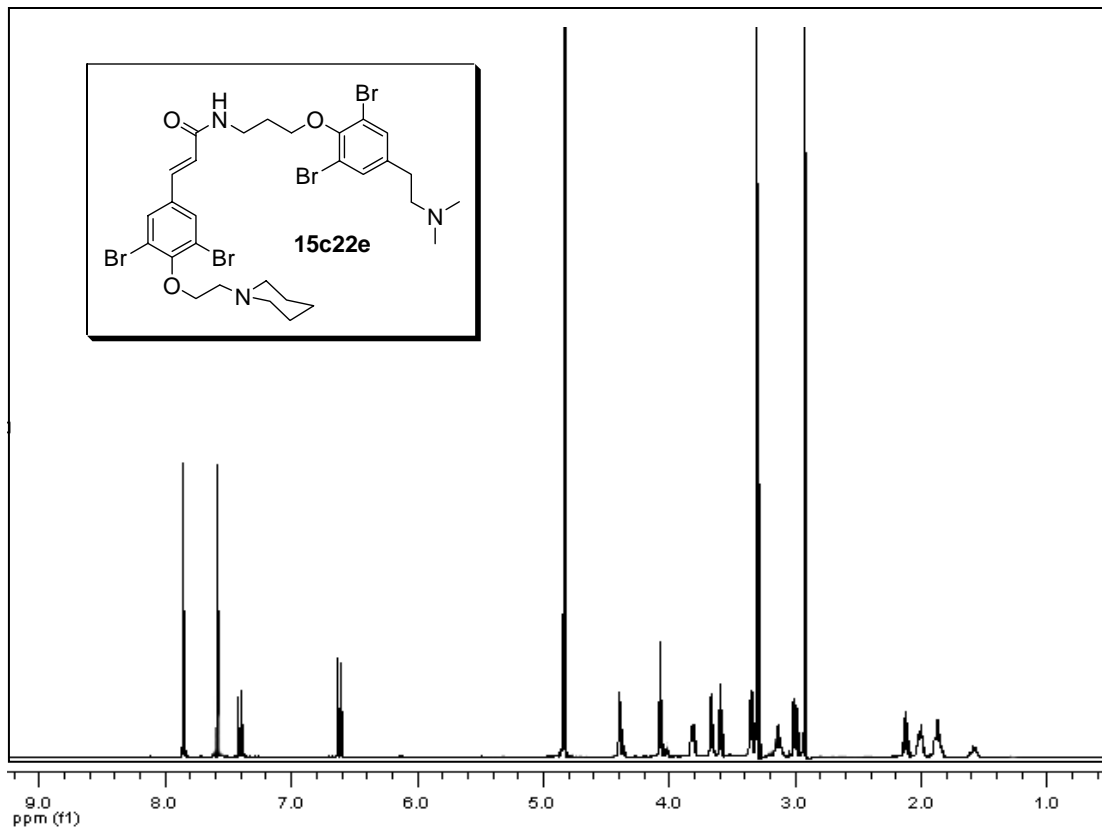

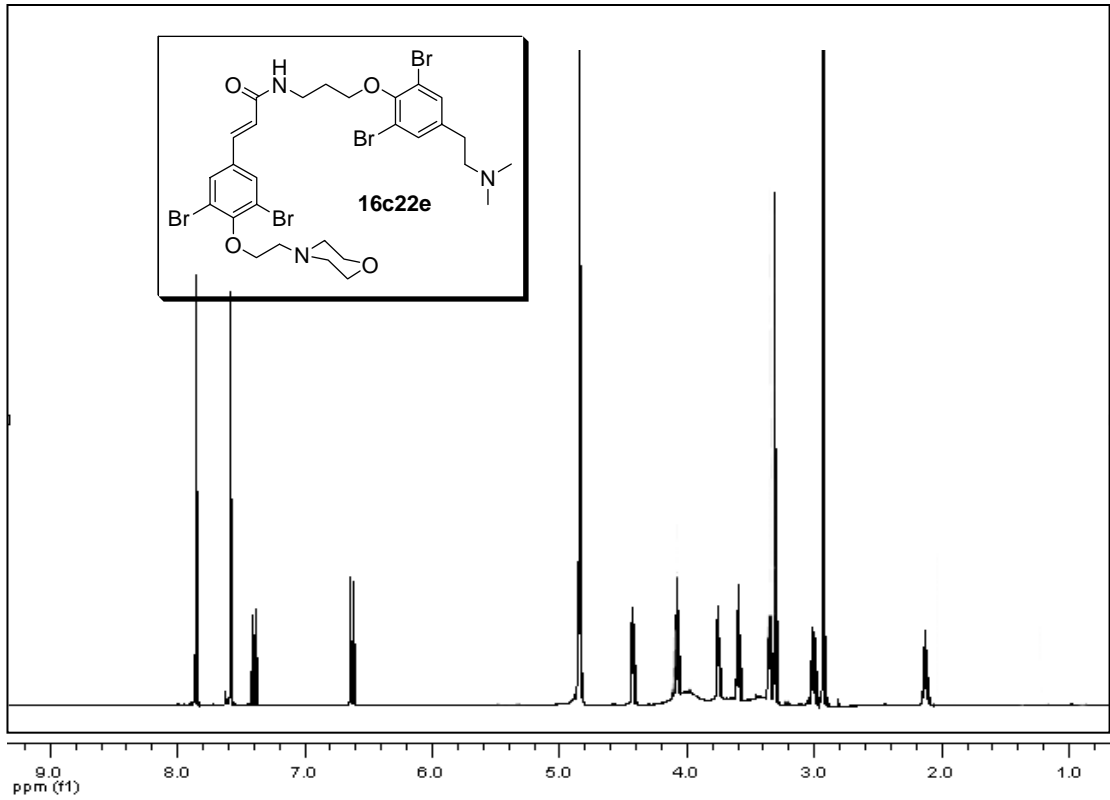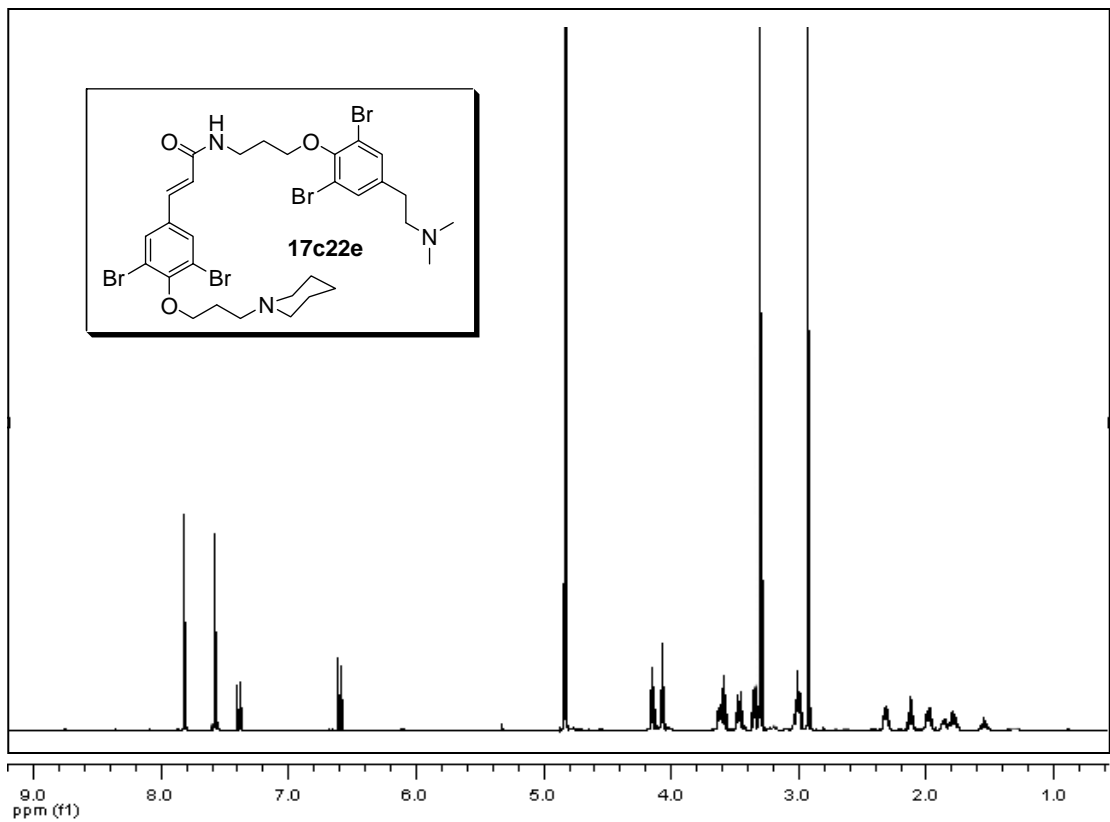

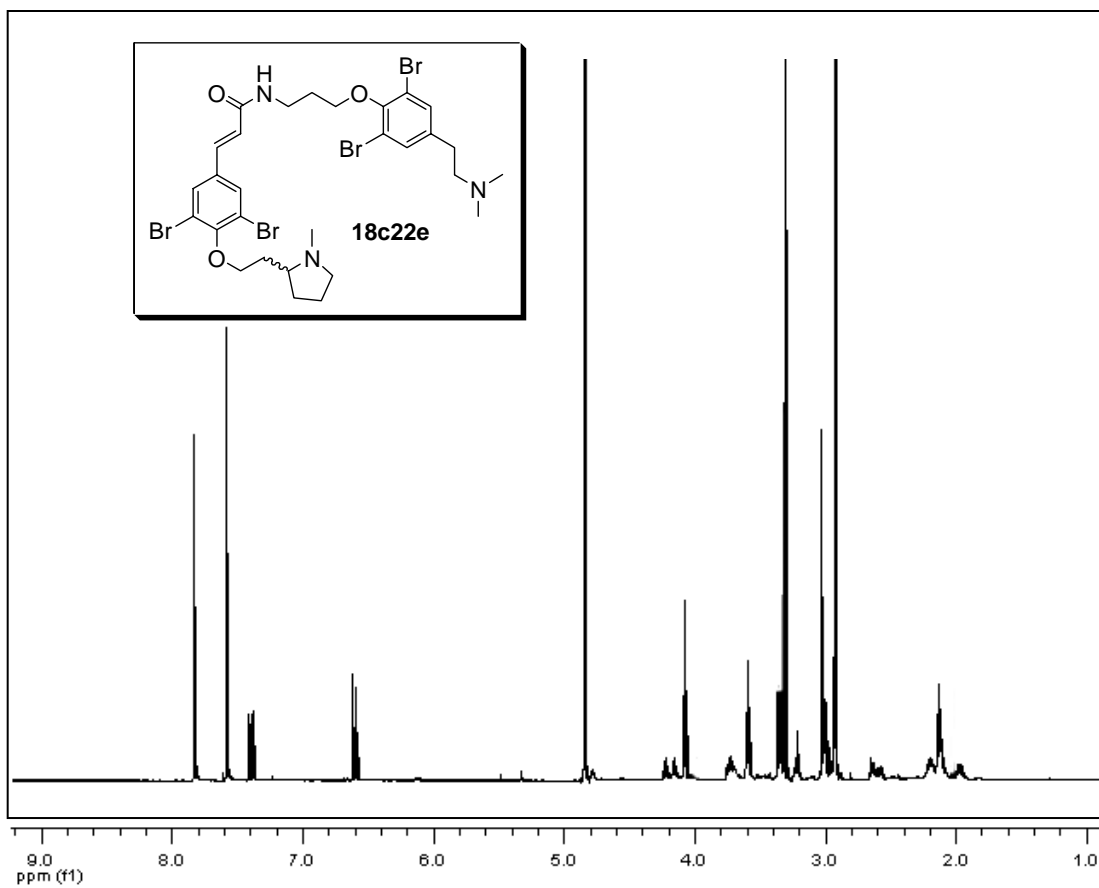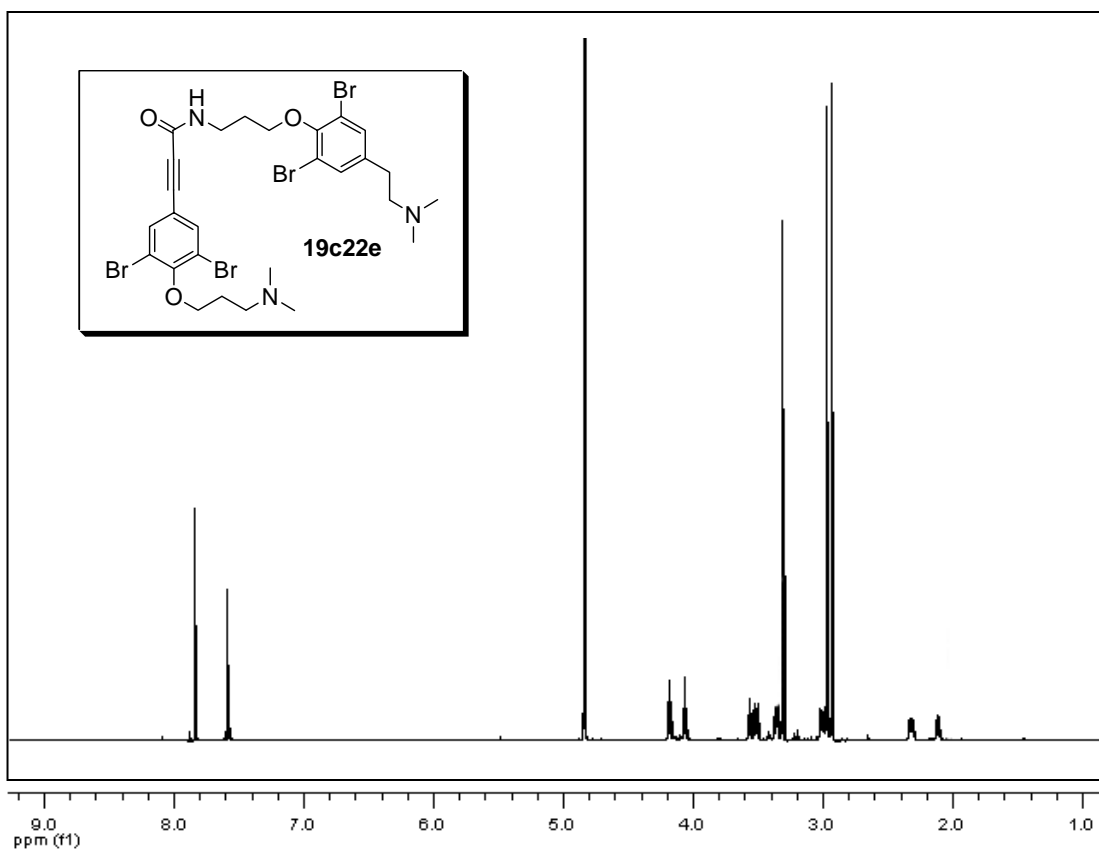

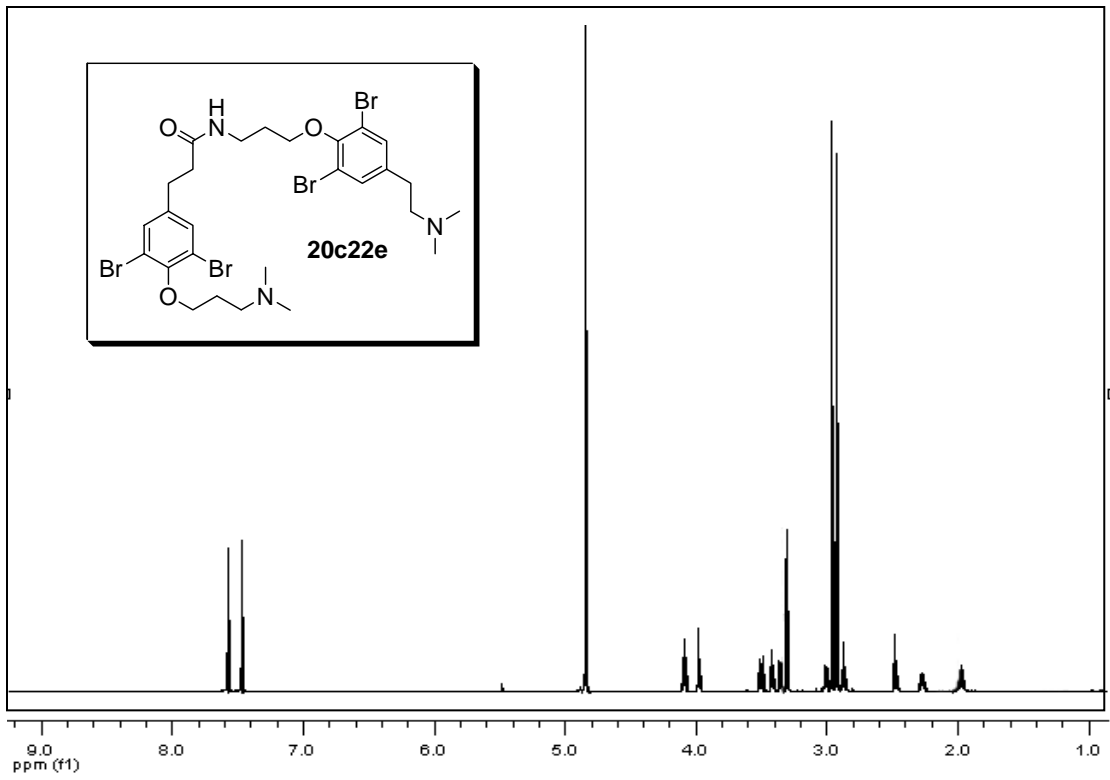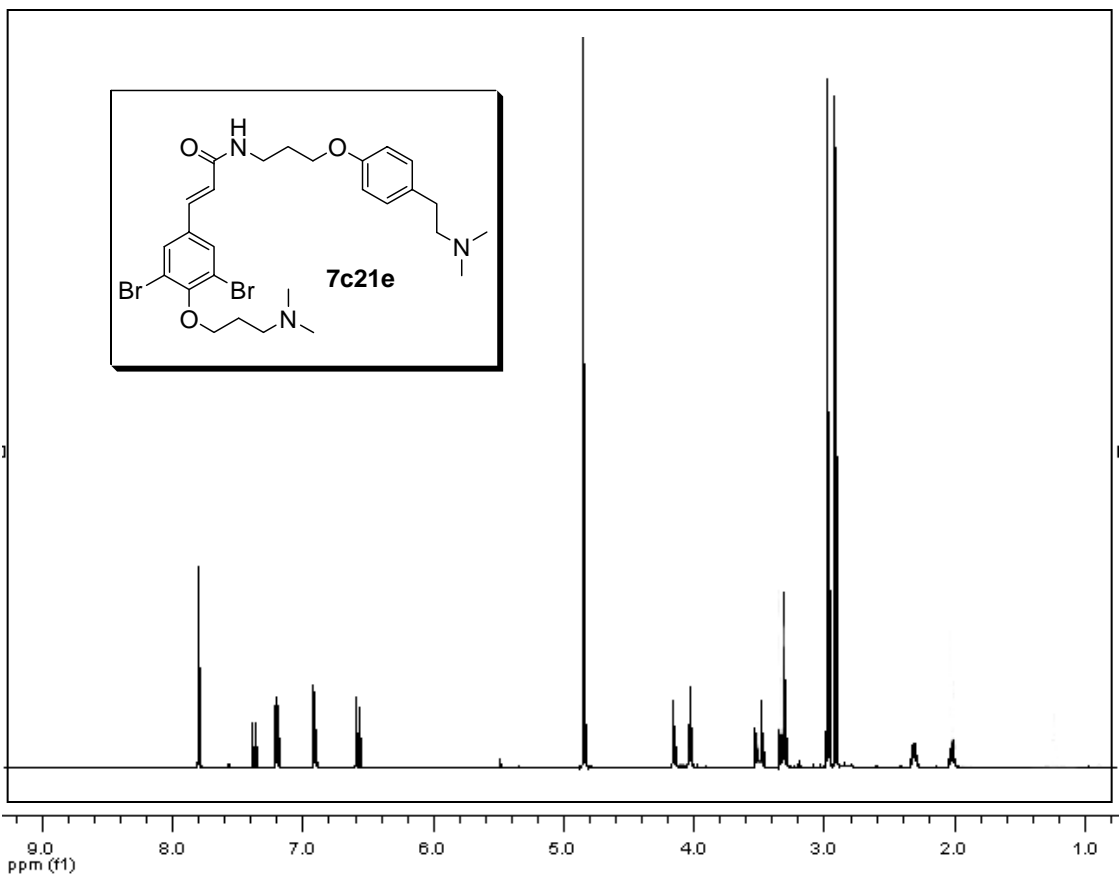

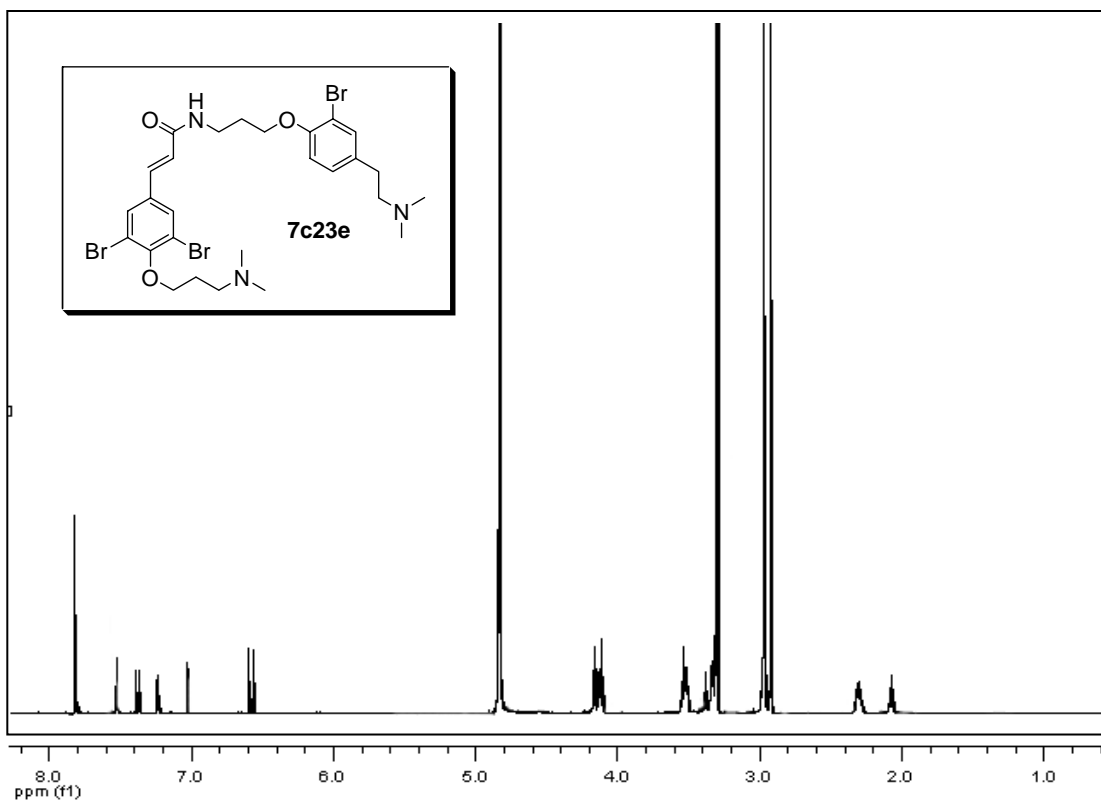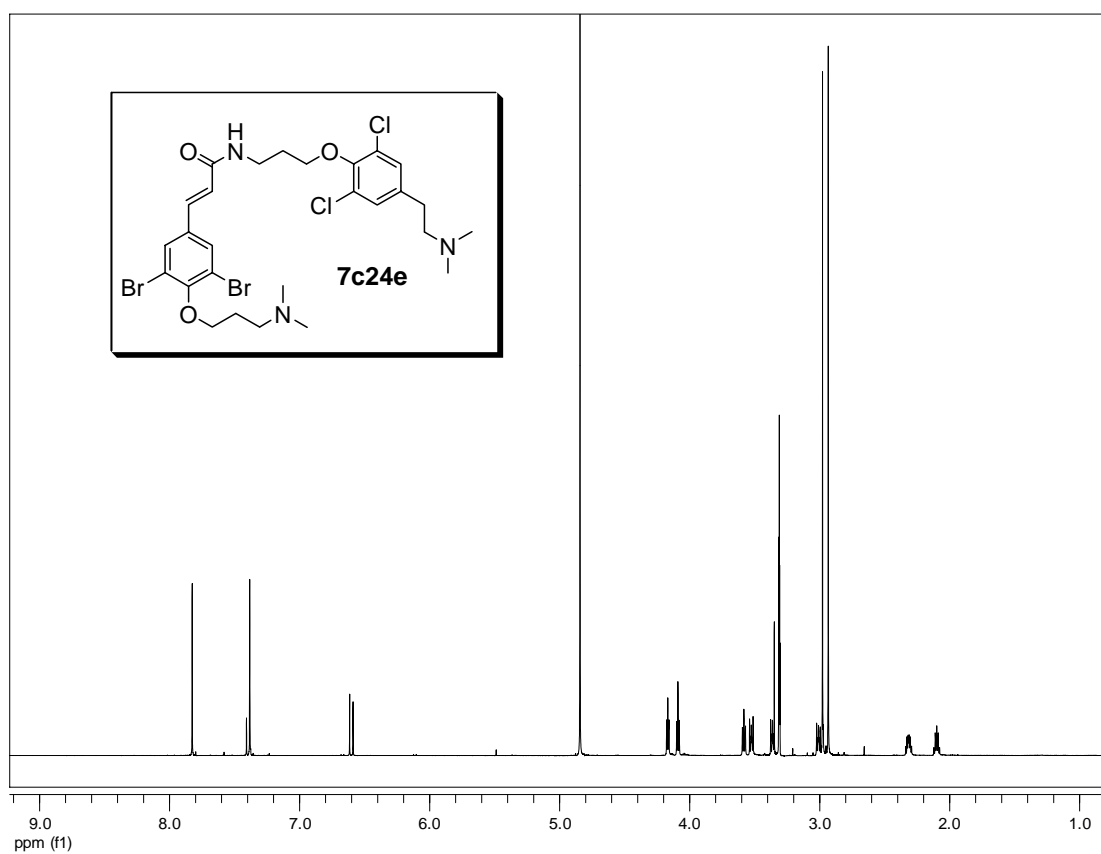

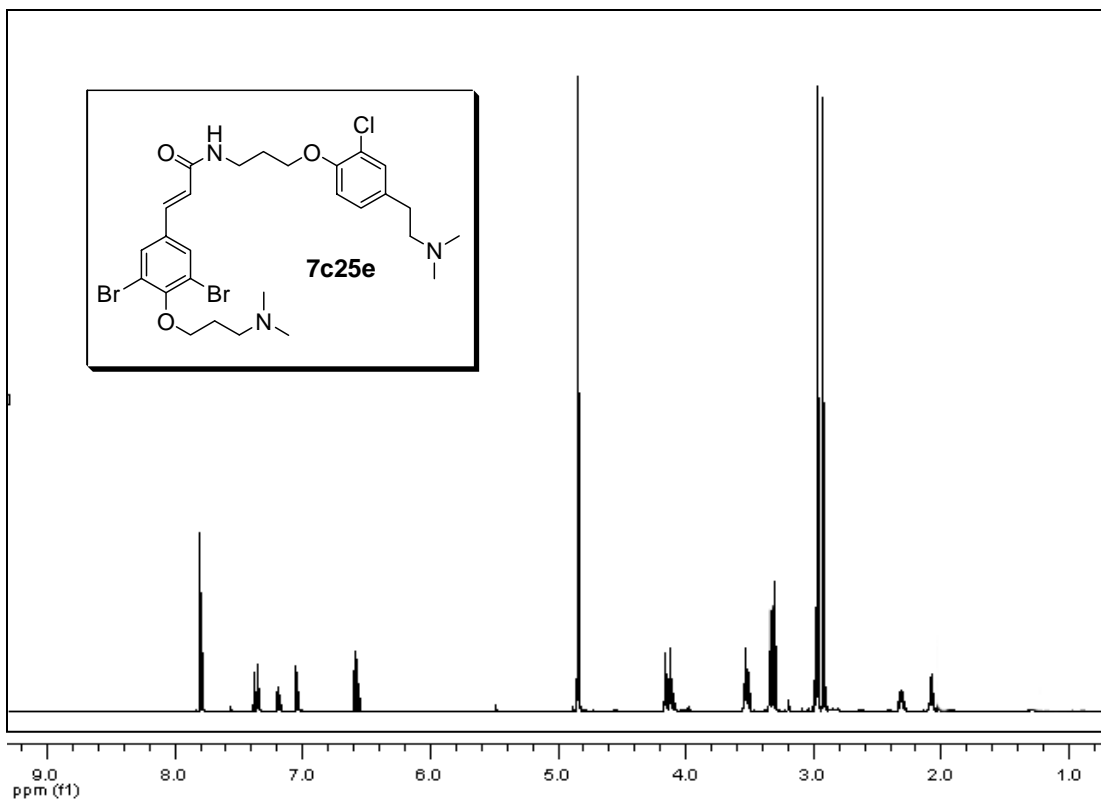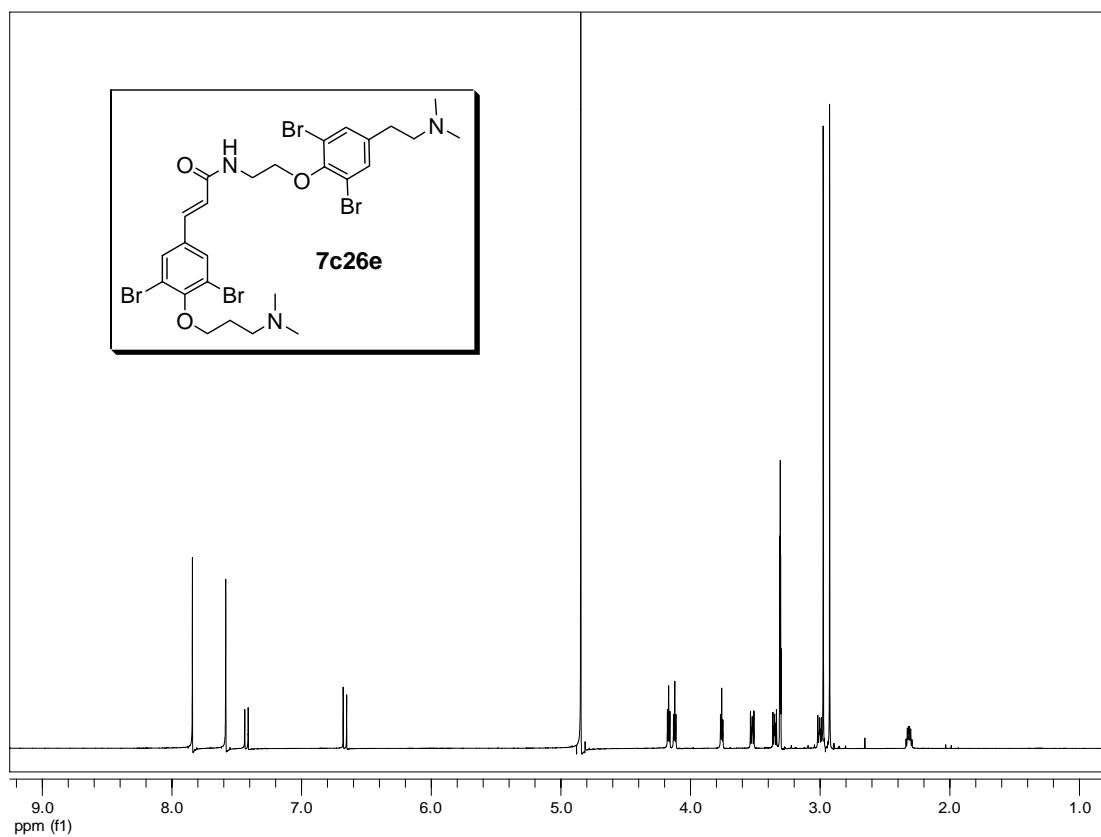

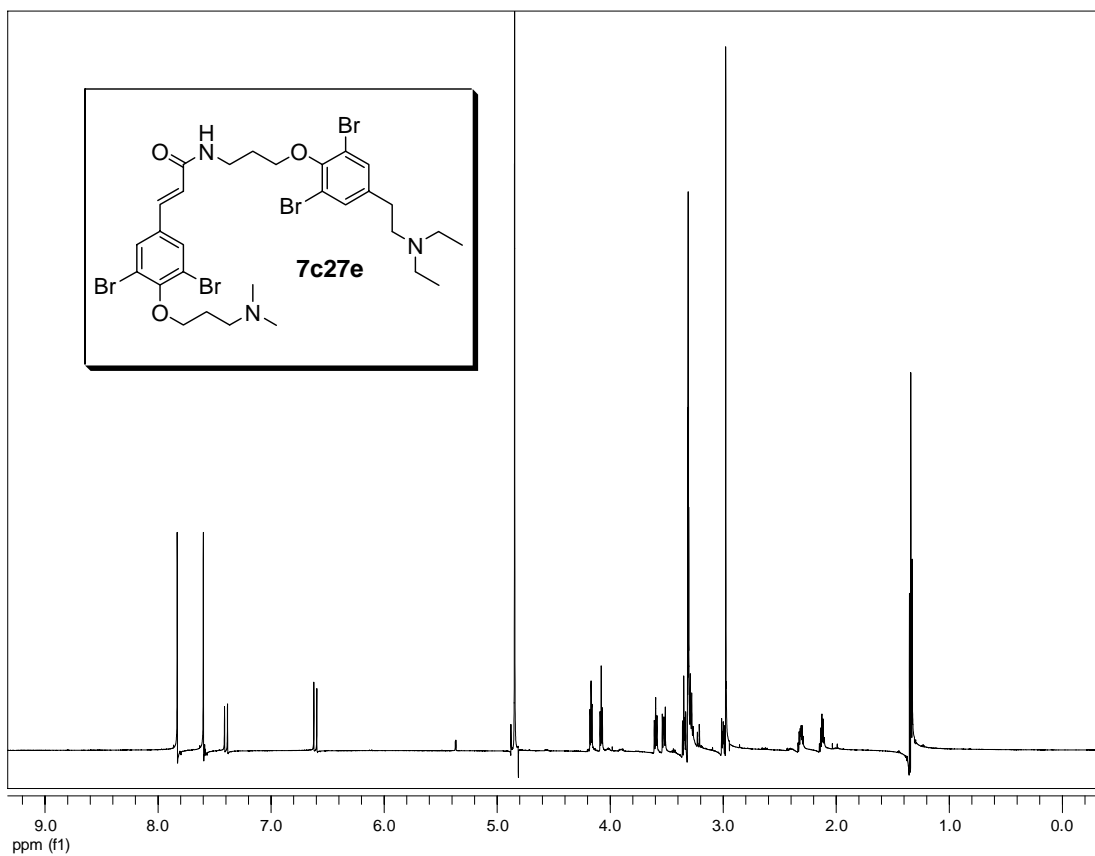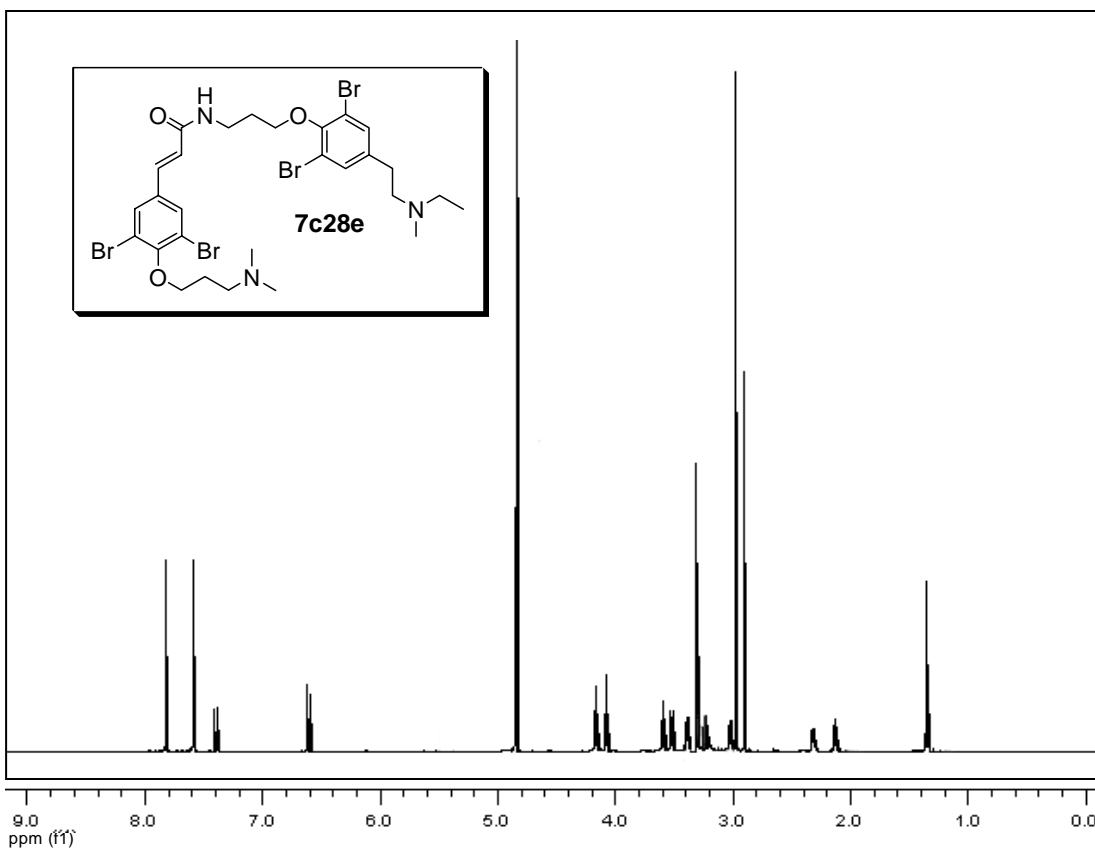

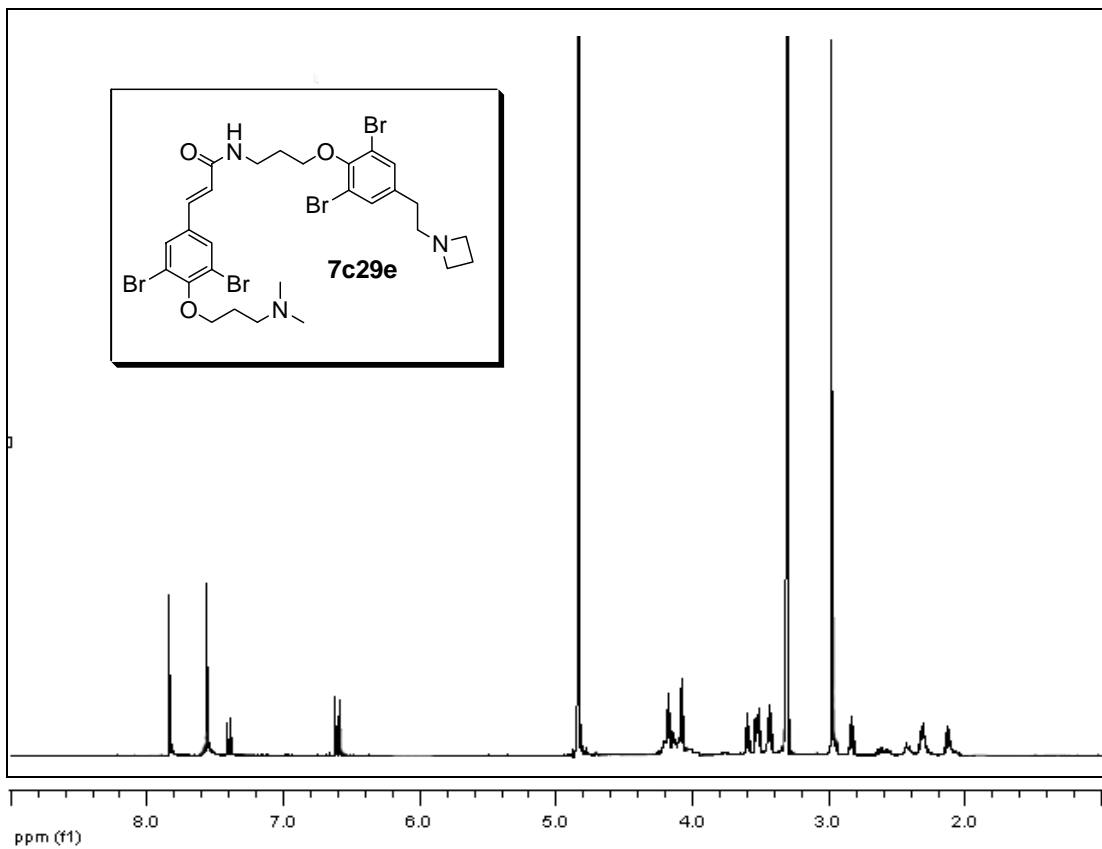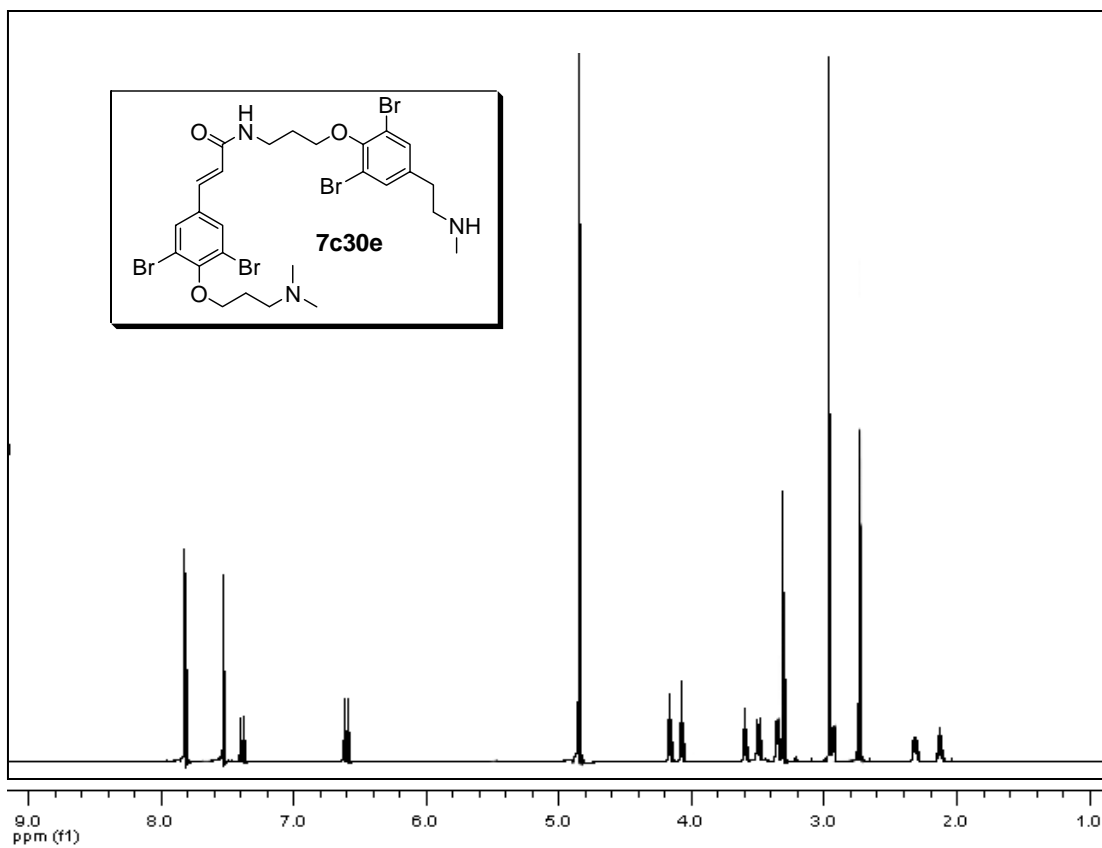



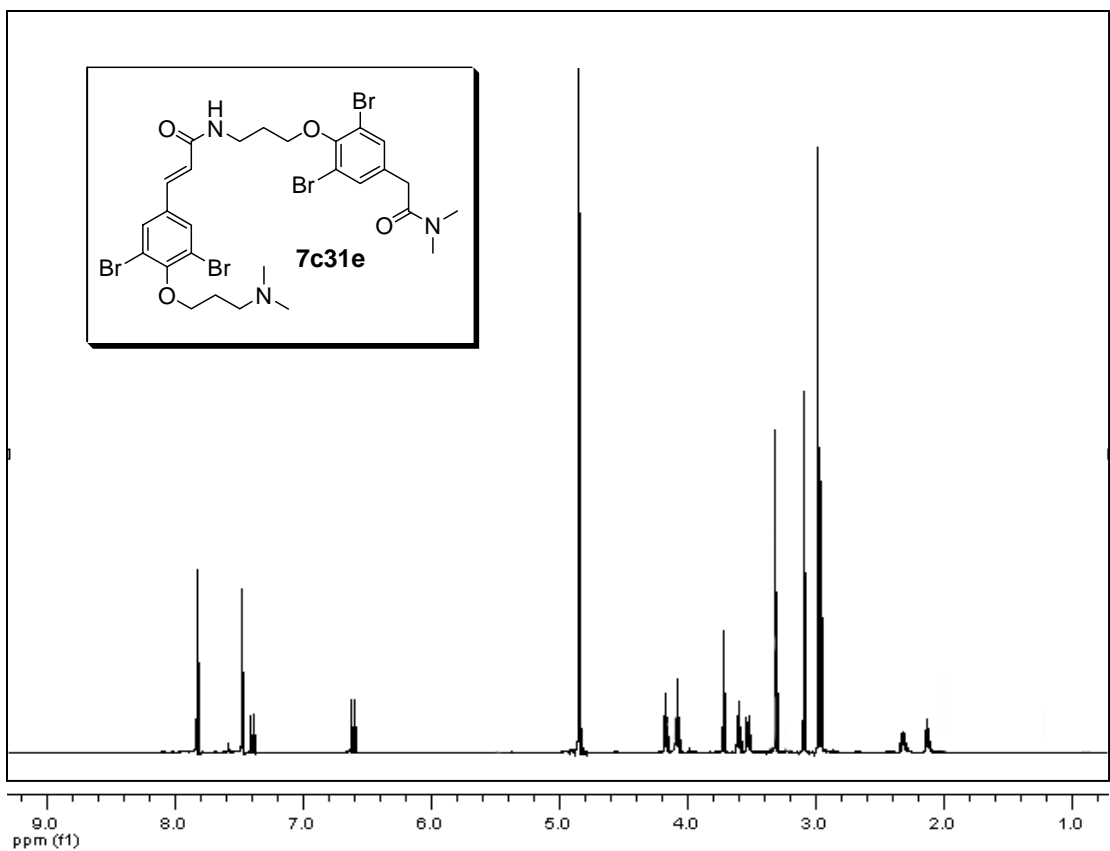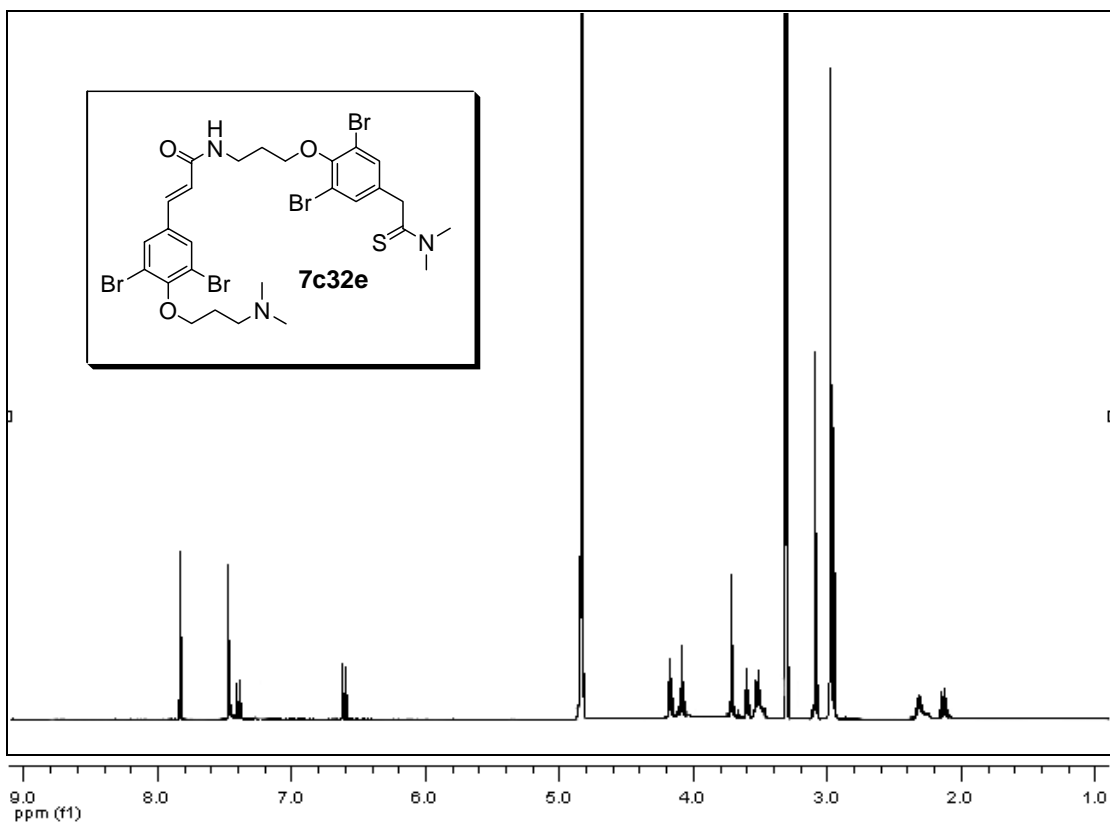

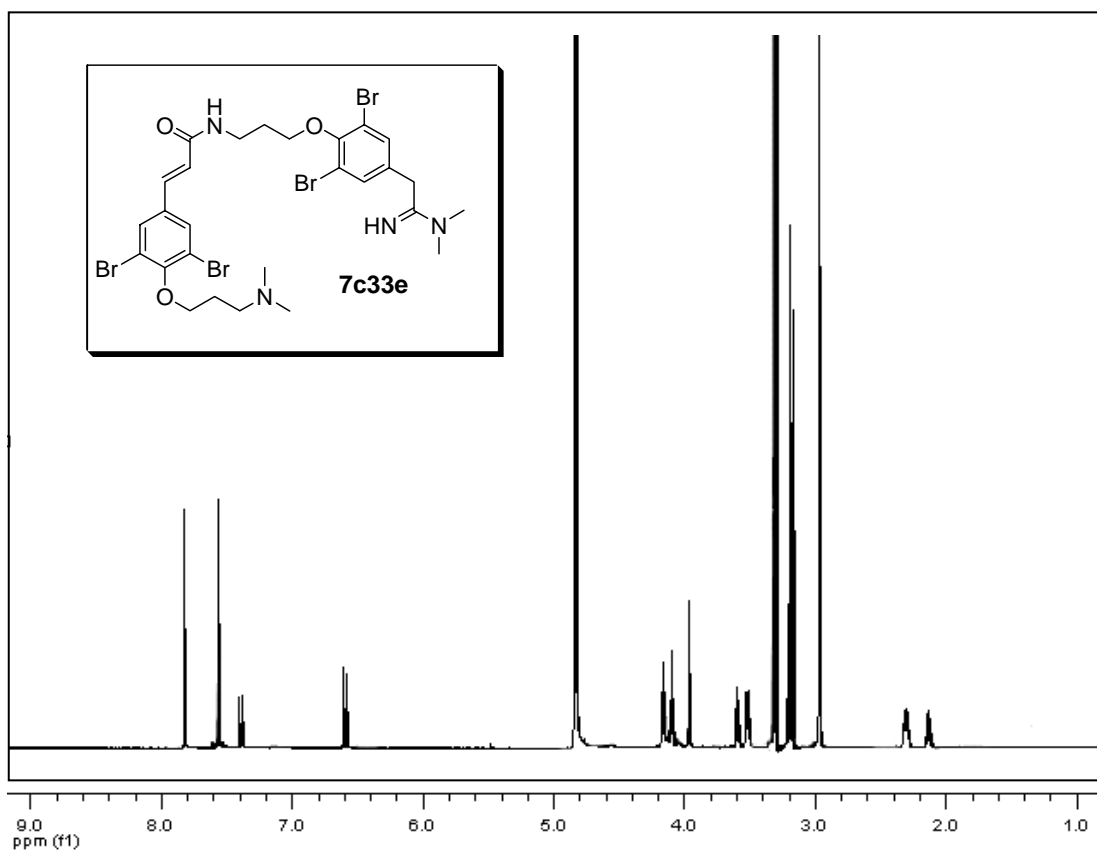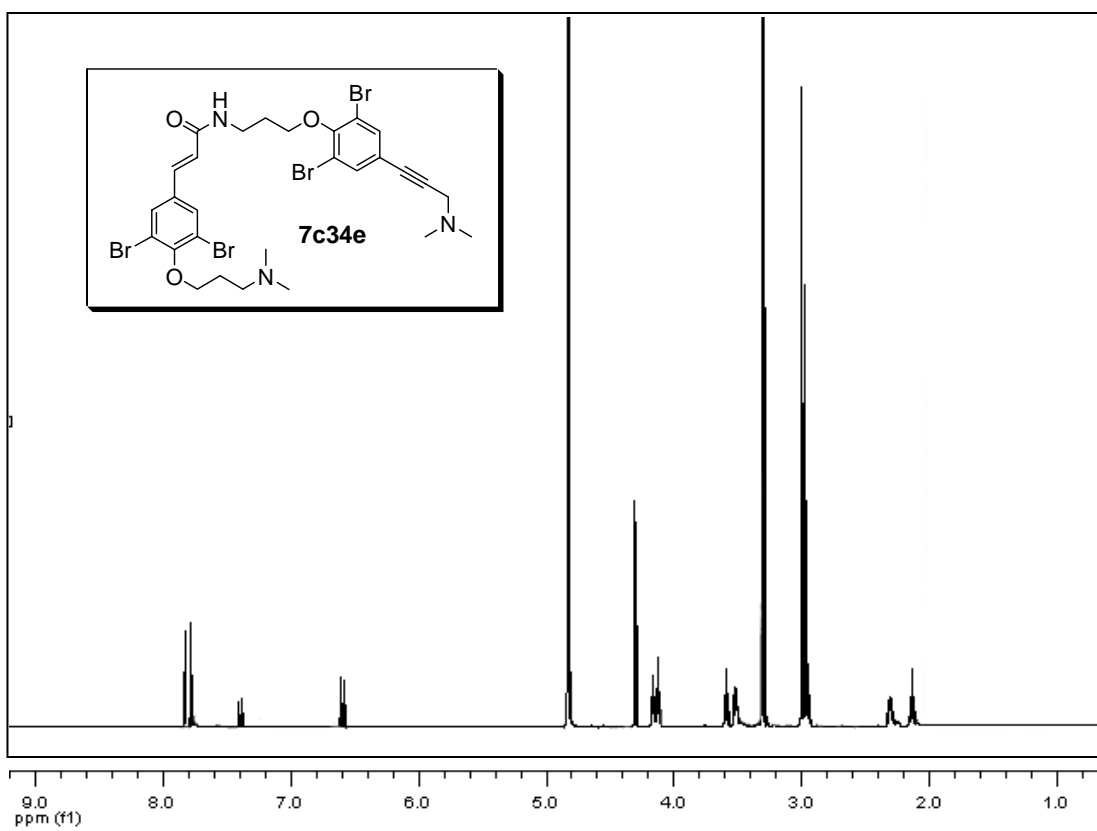

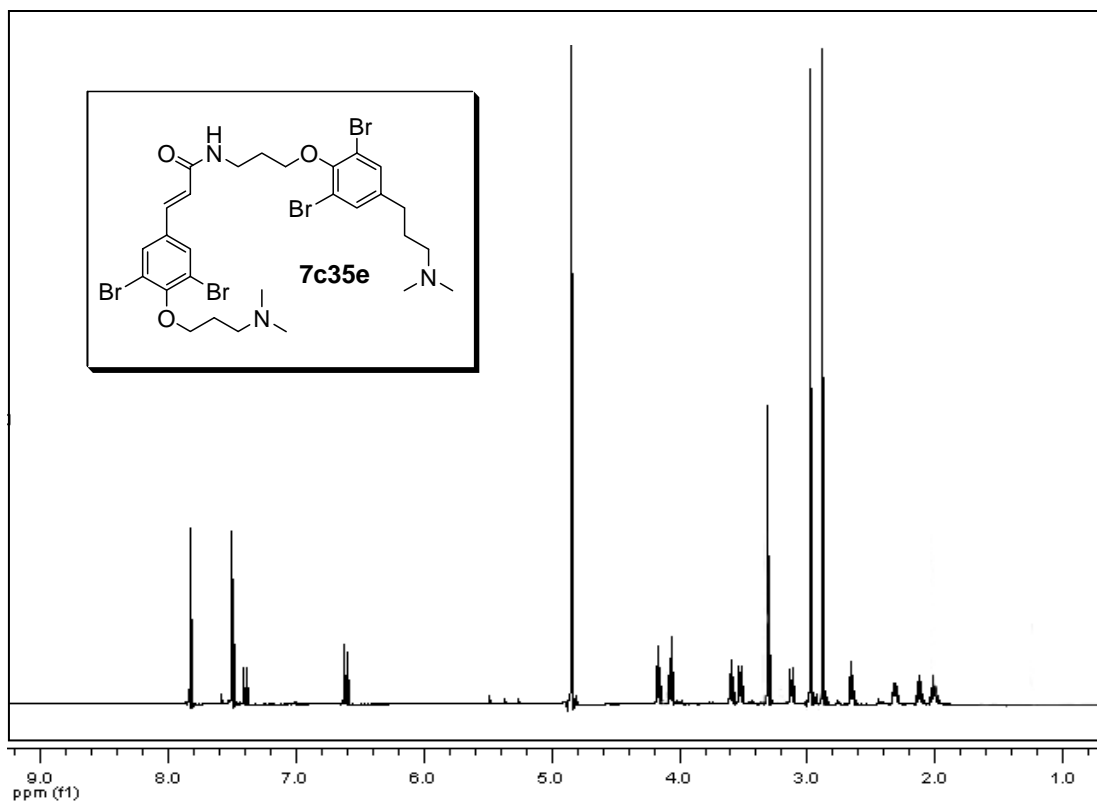

**<sup>13</sup>C-NMR SPECTRA OF FINAL PRODUCTS PREPARED ON LARGE SCALE**

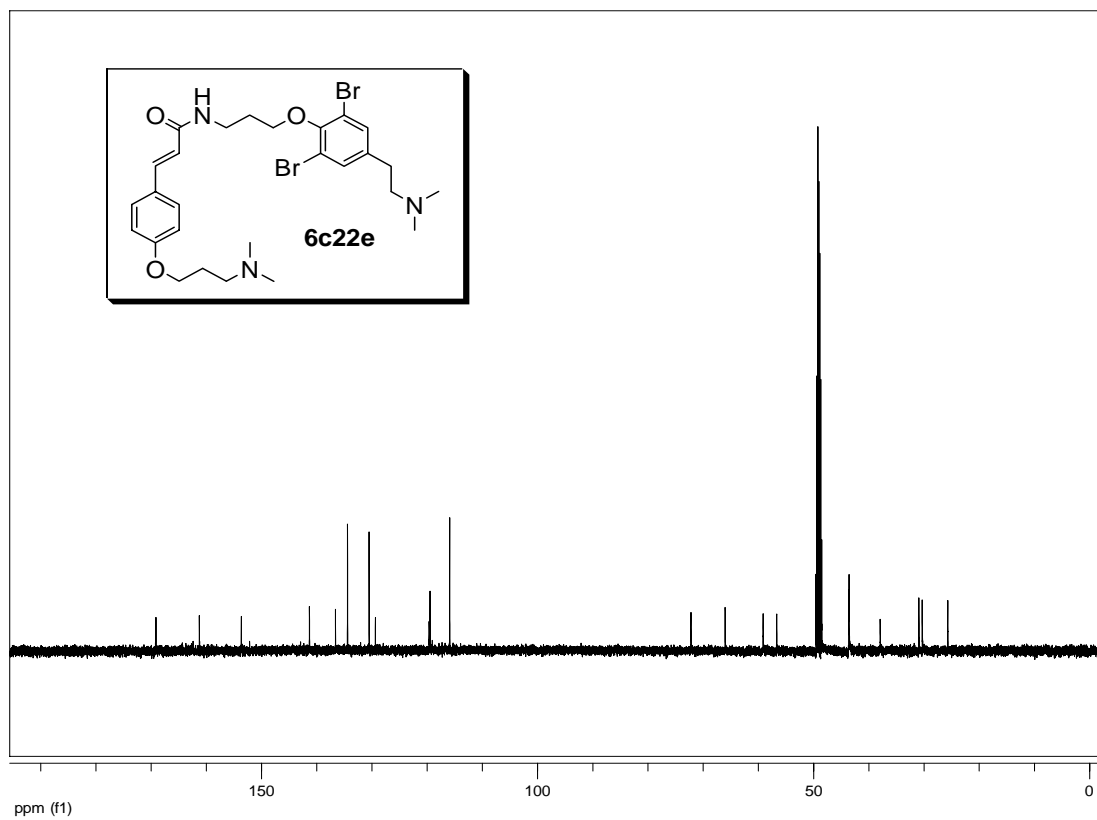

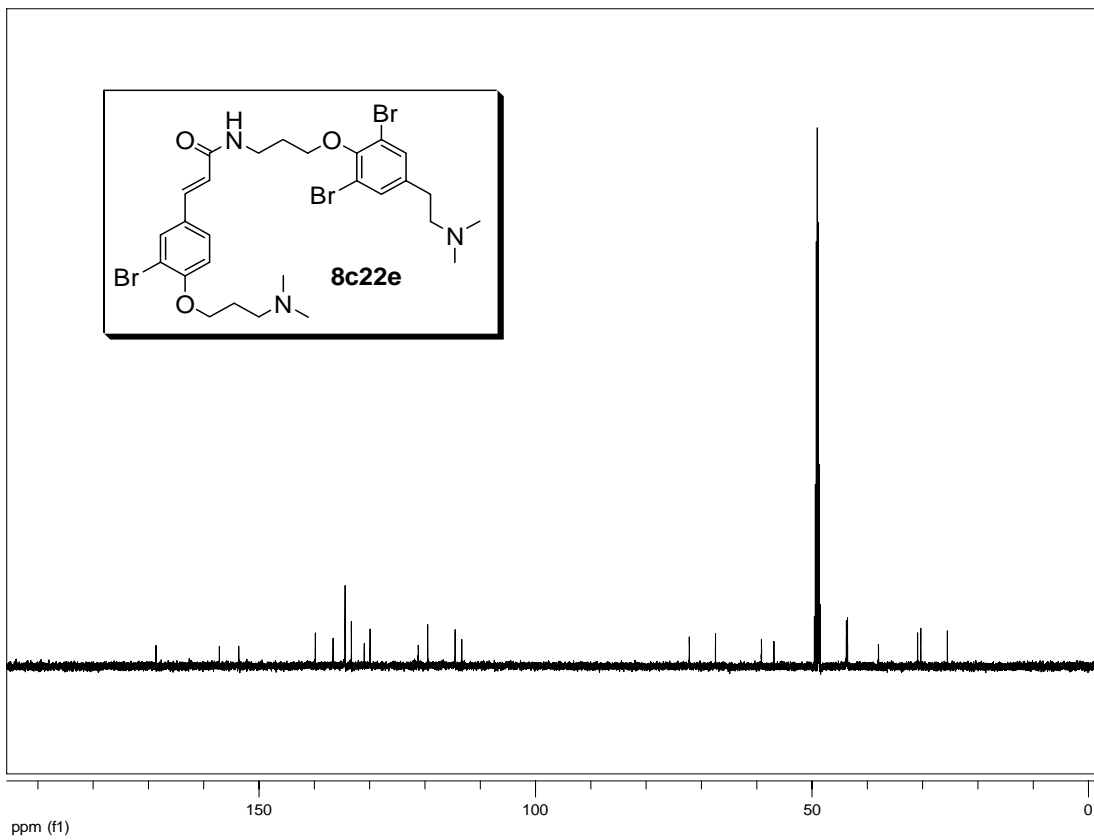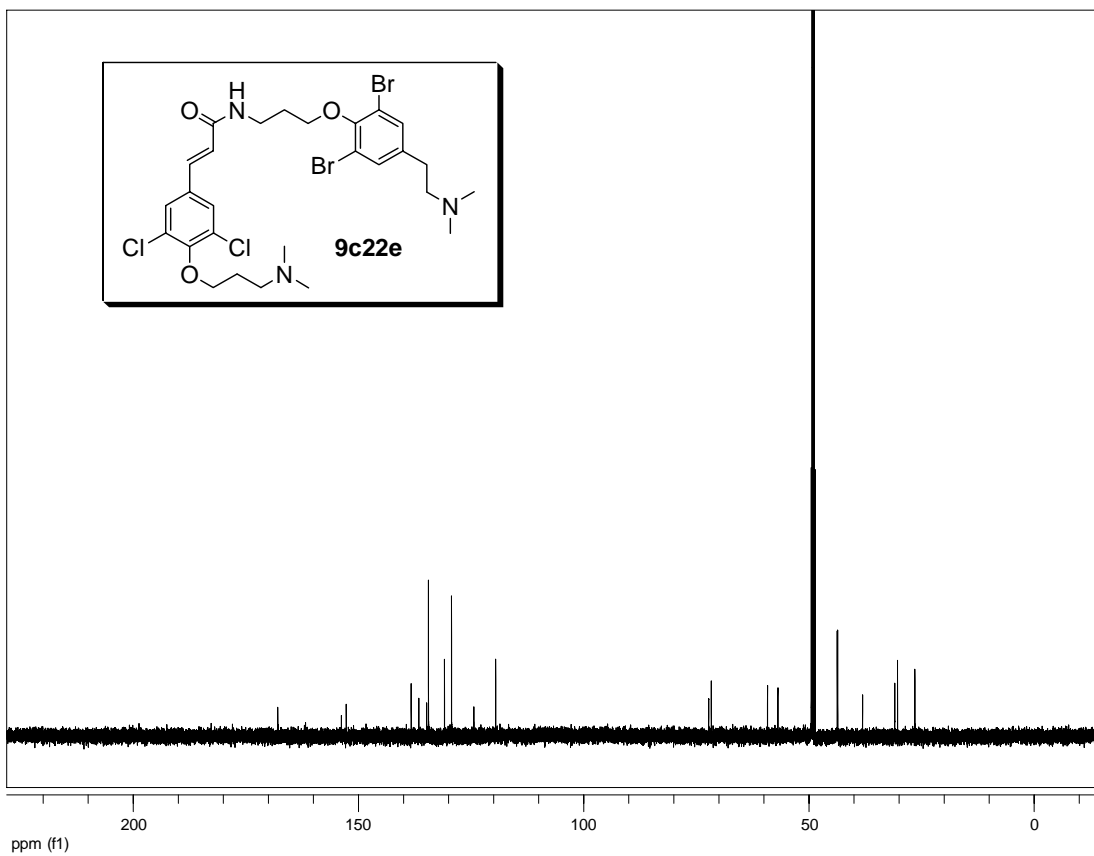

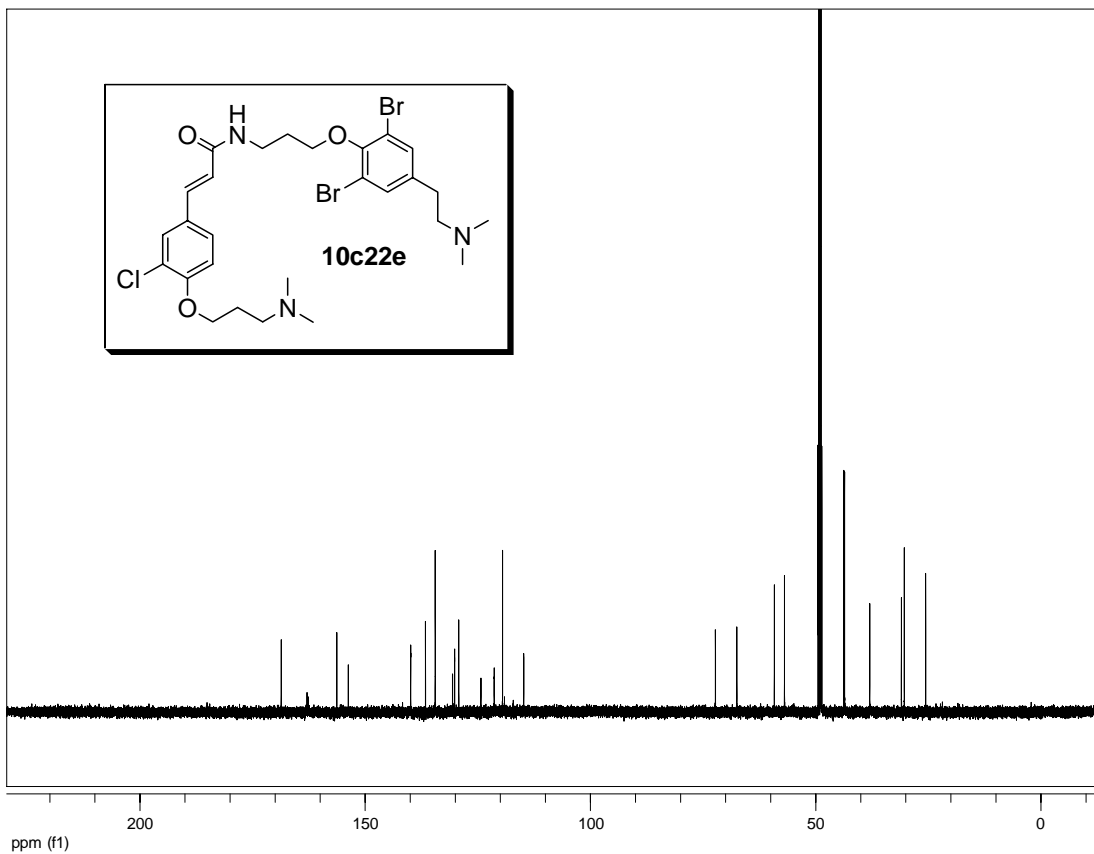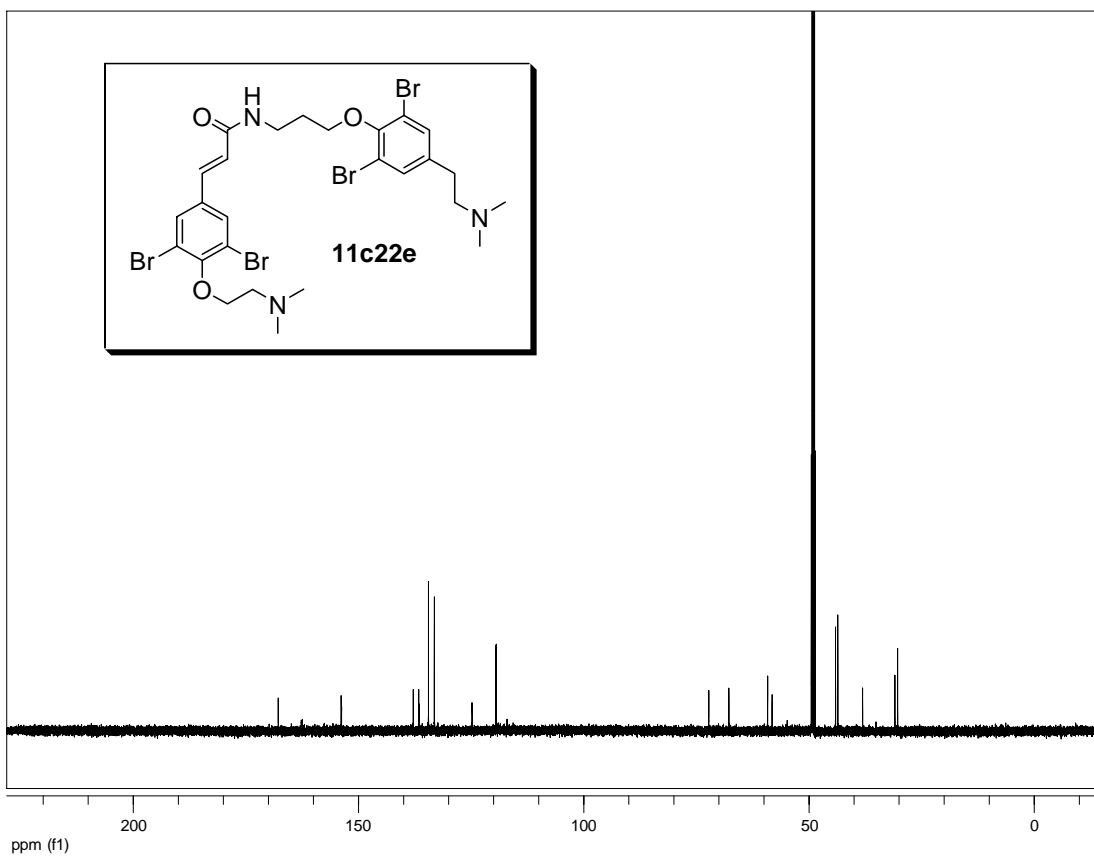

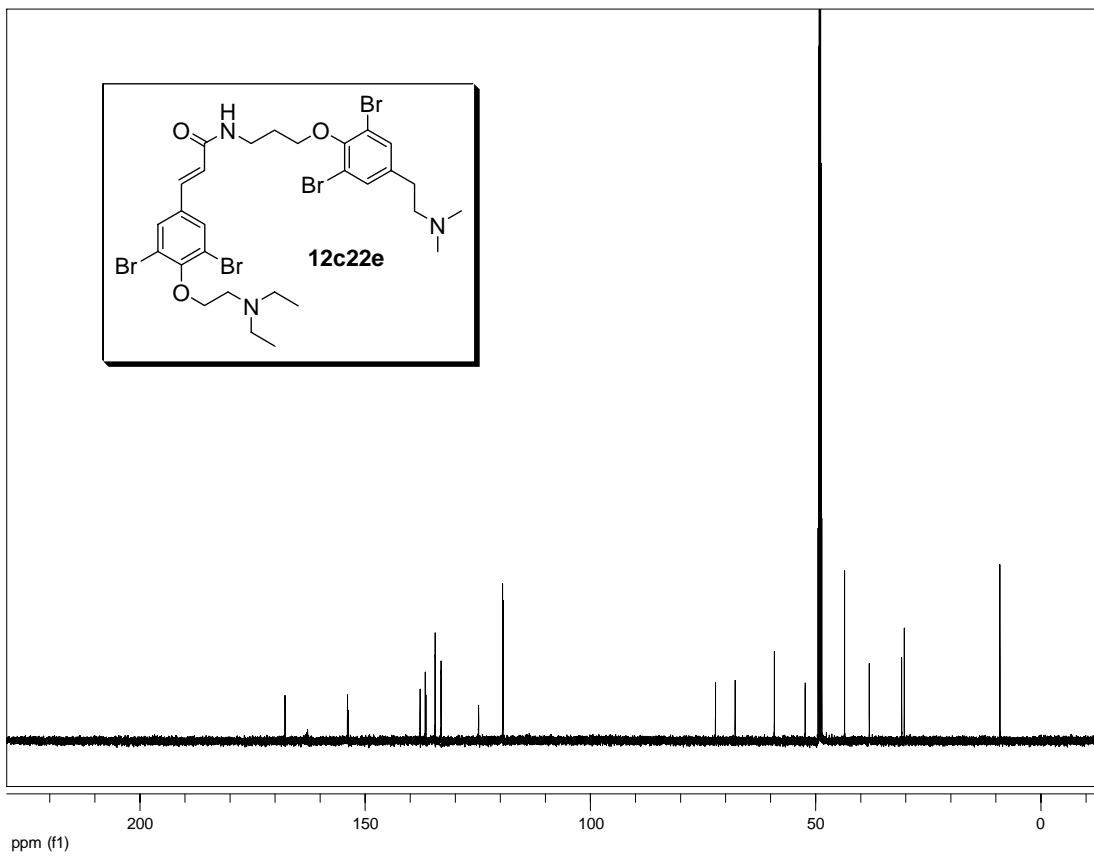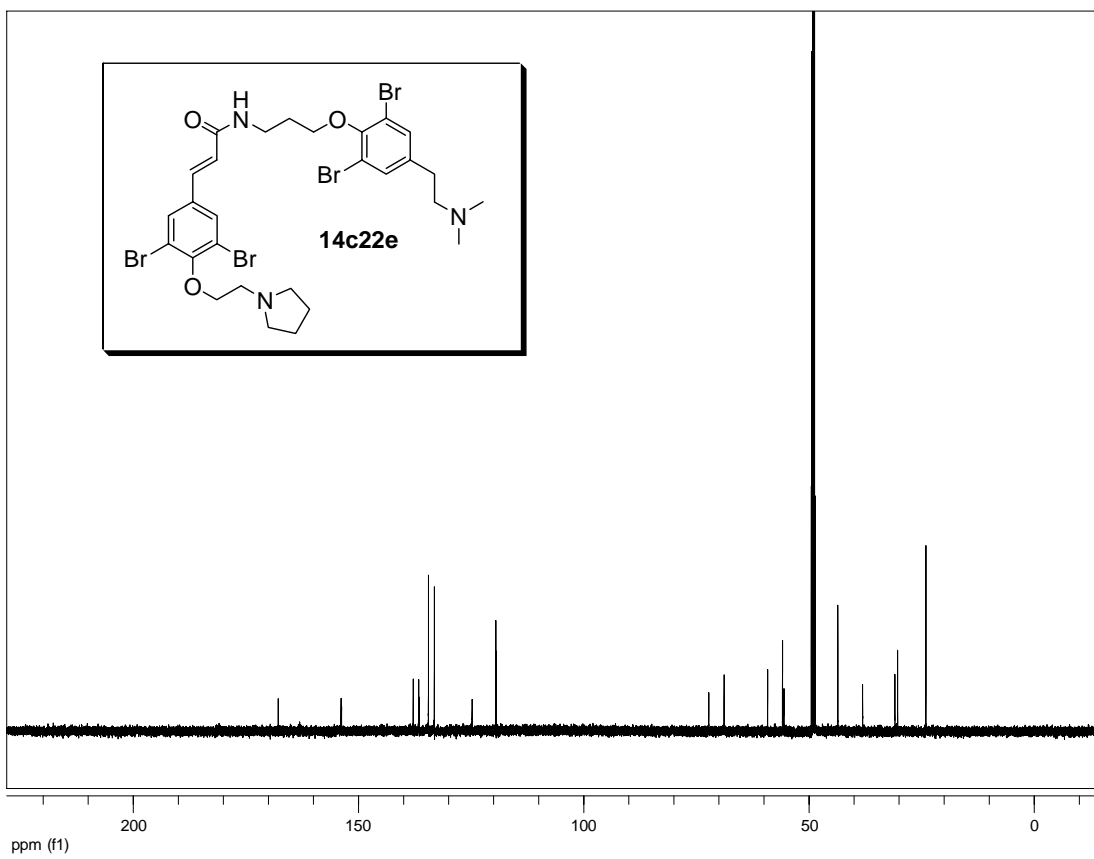

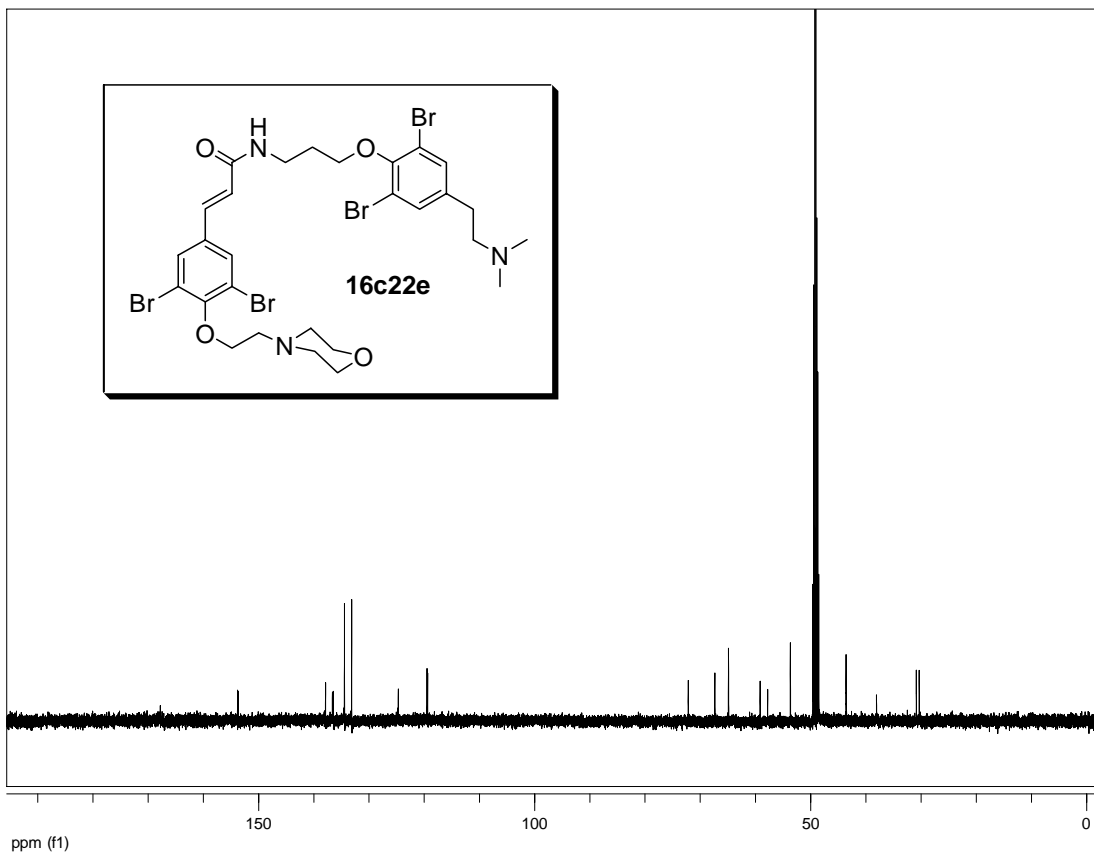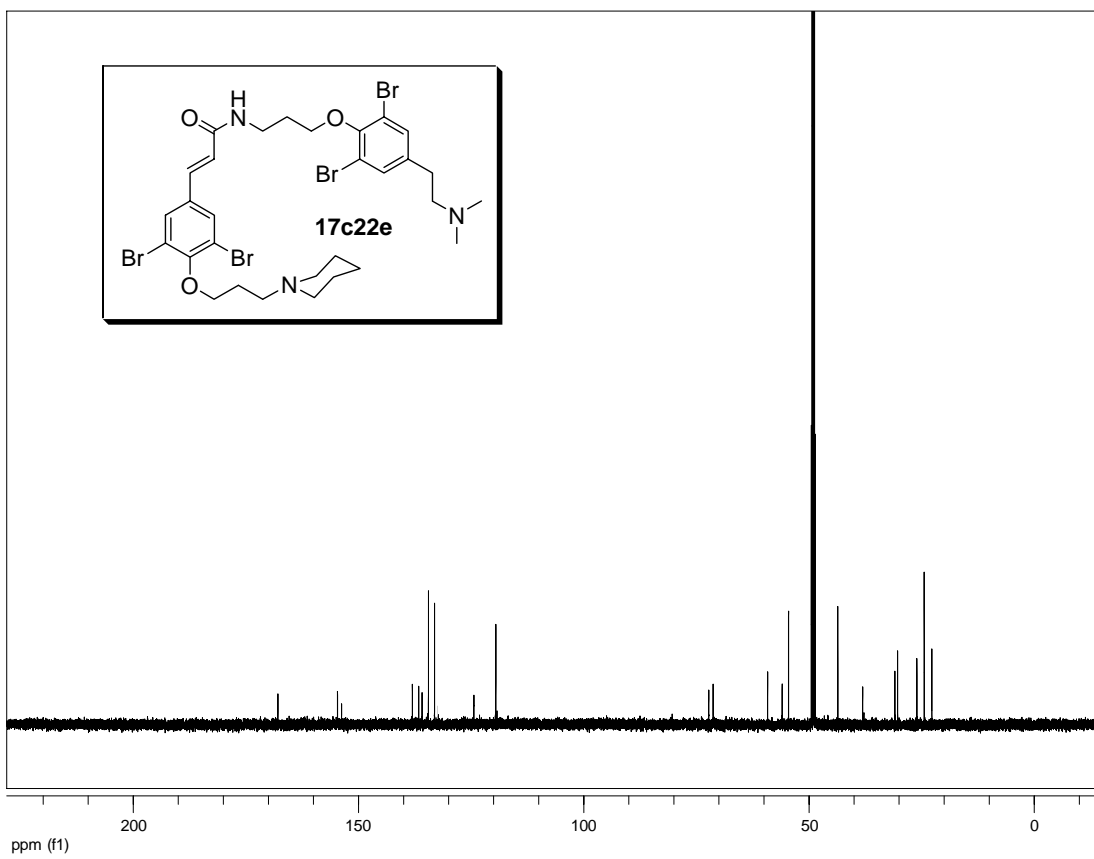

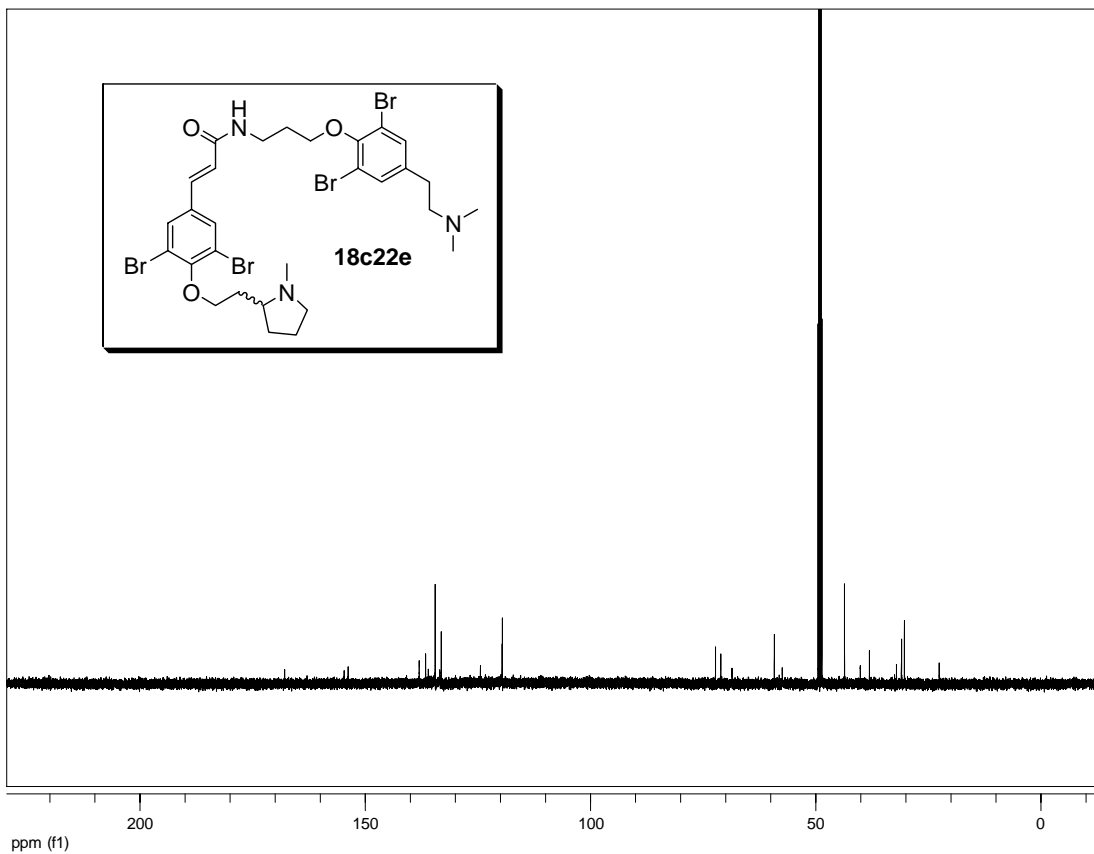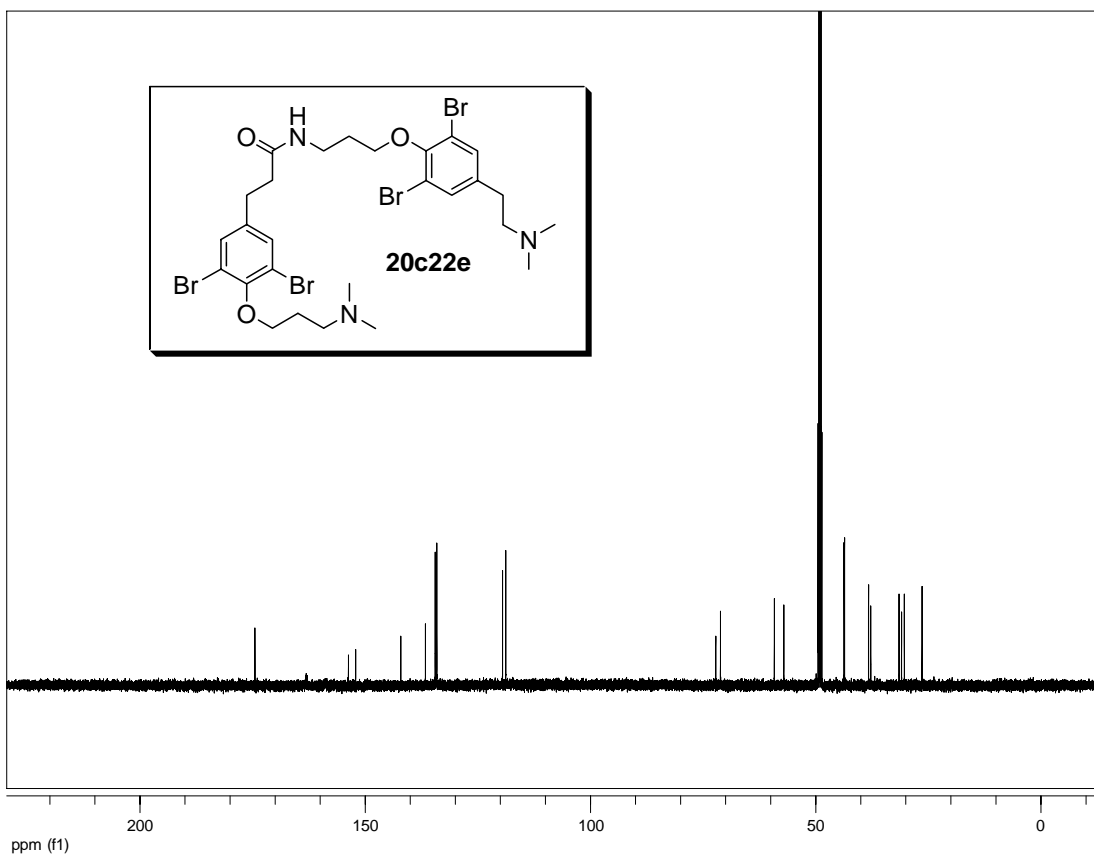



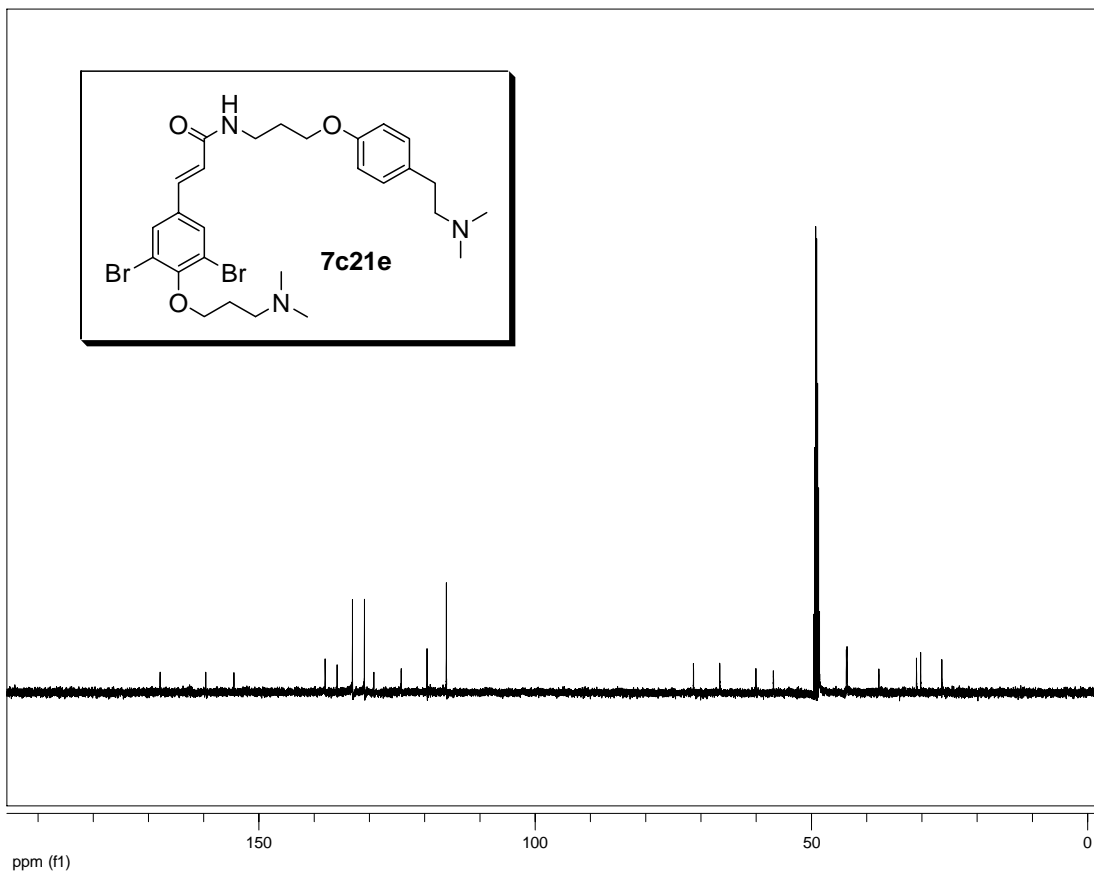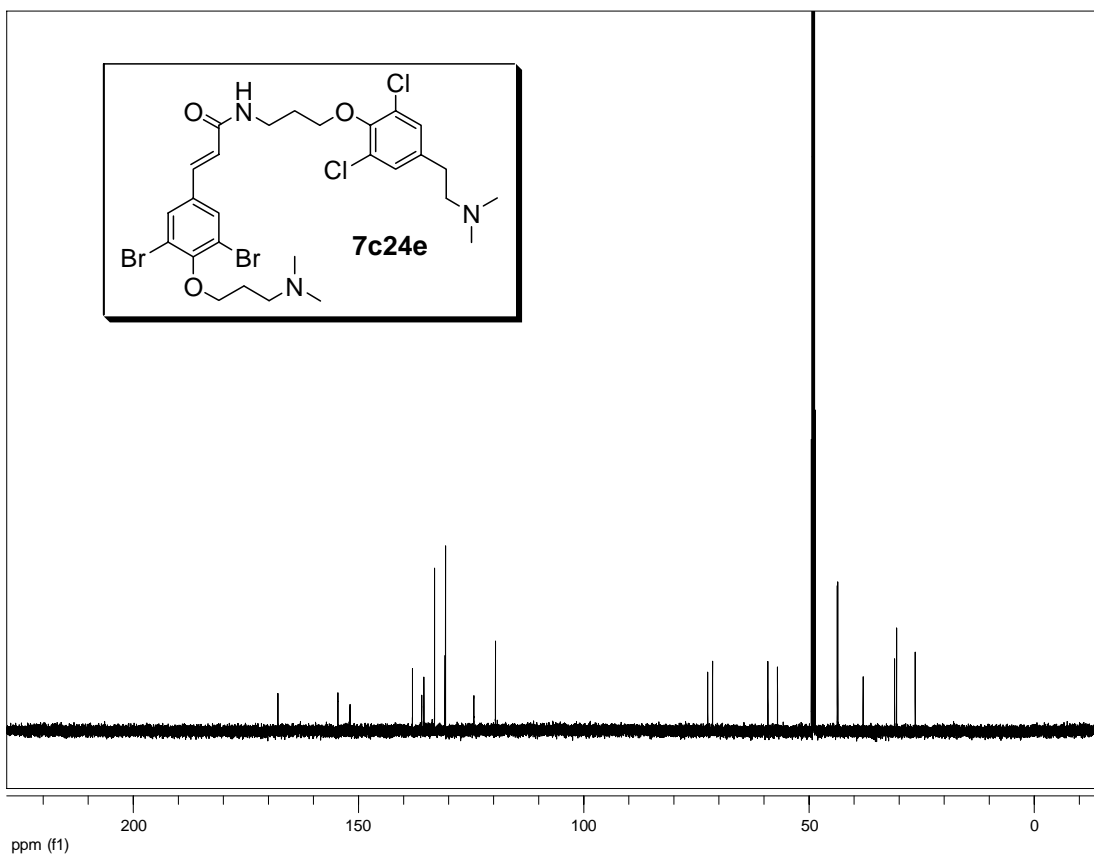

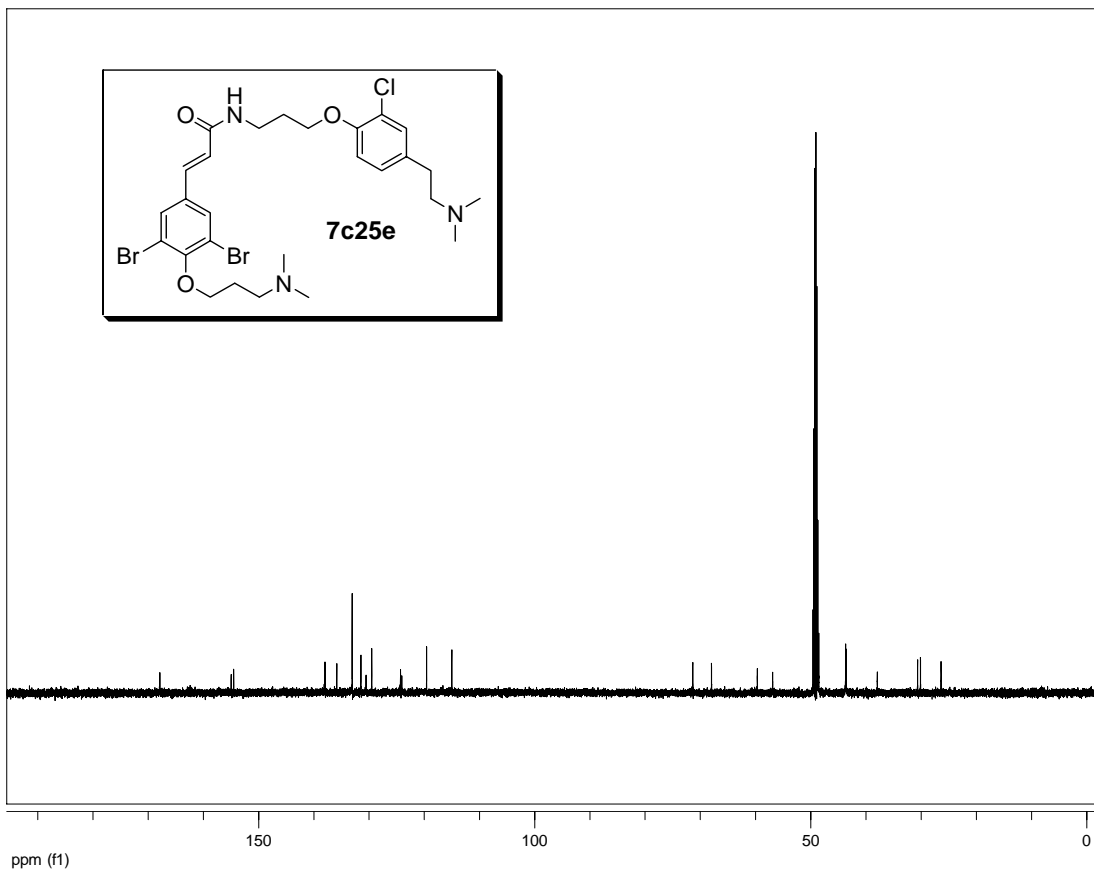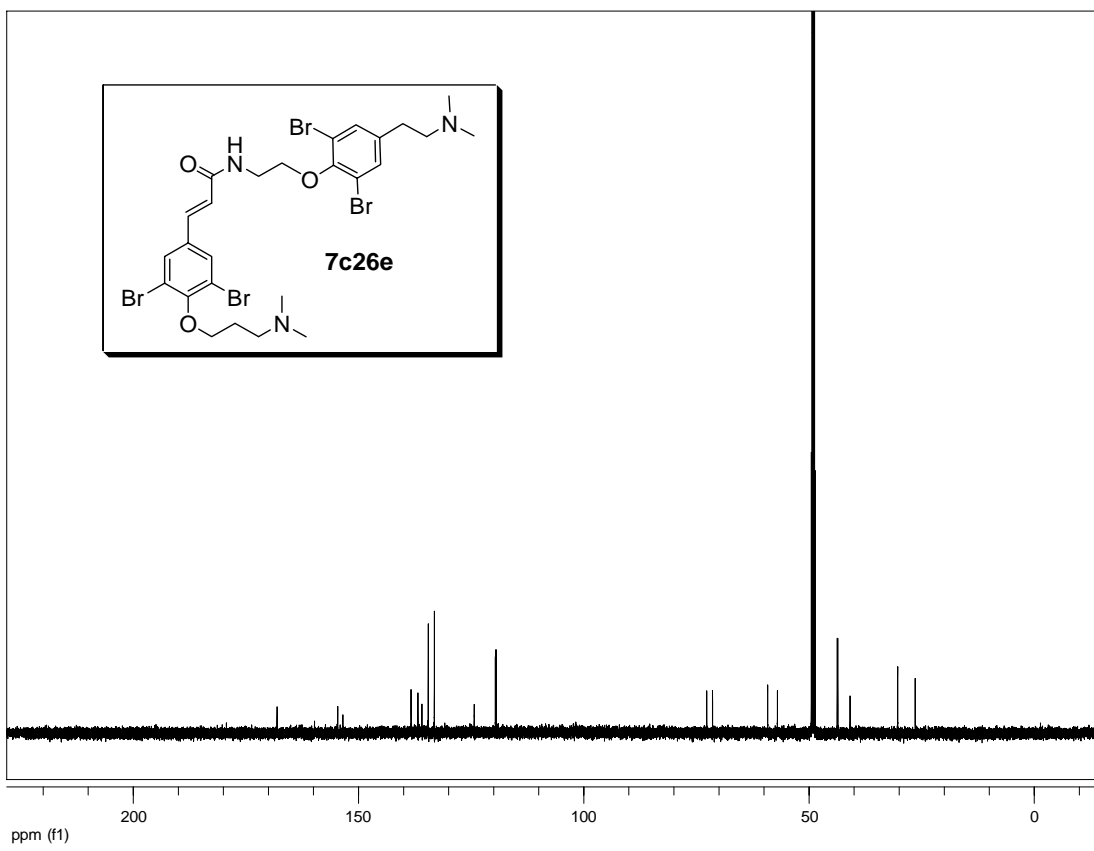

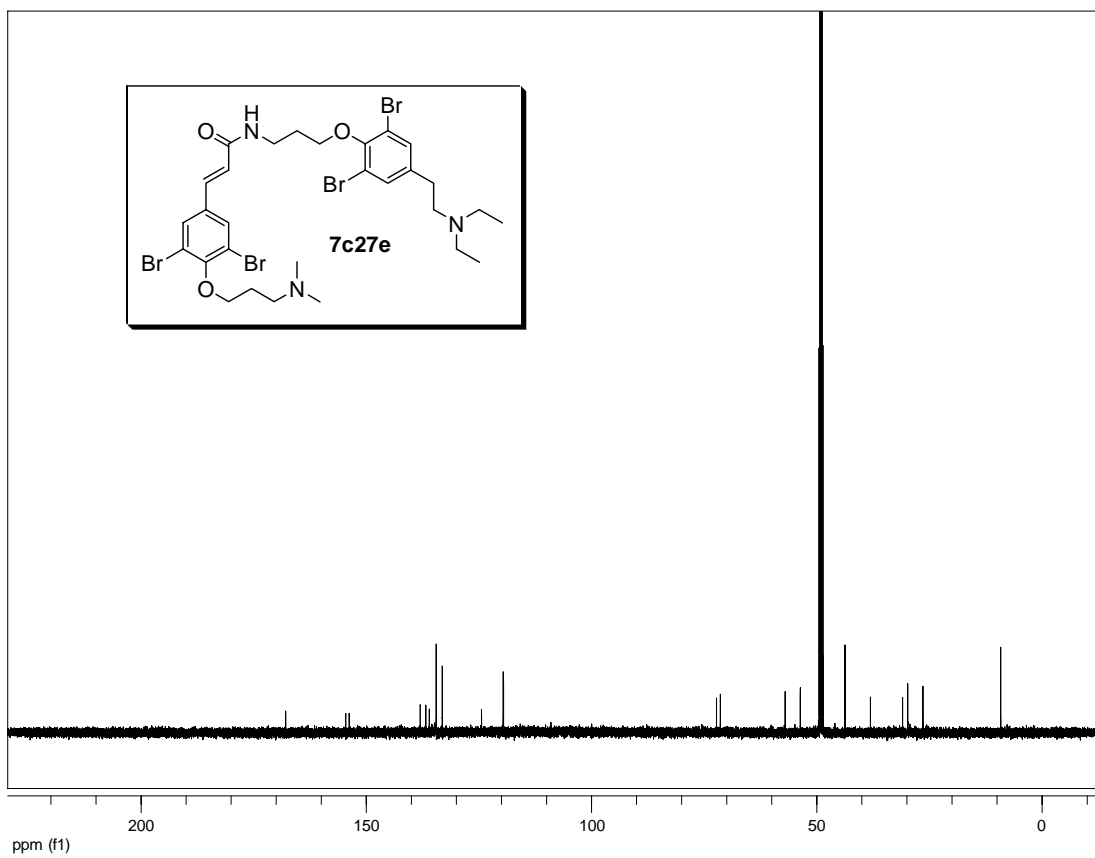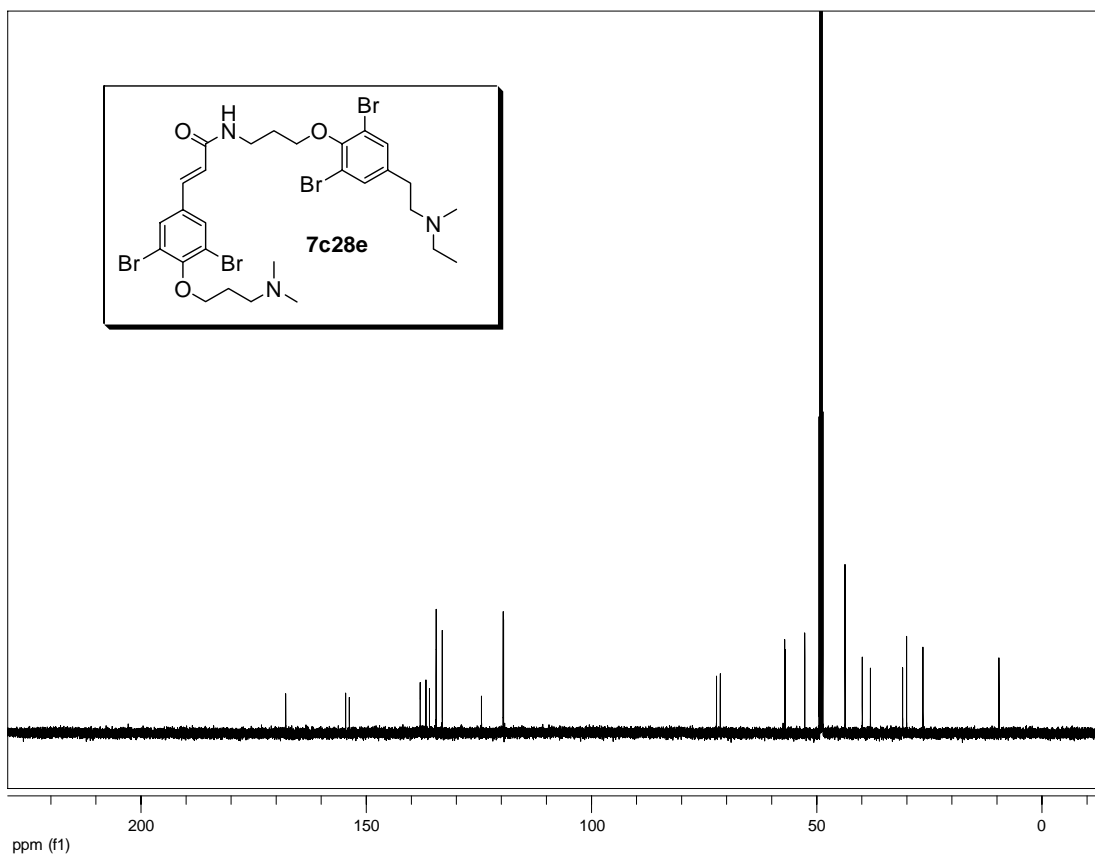

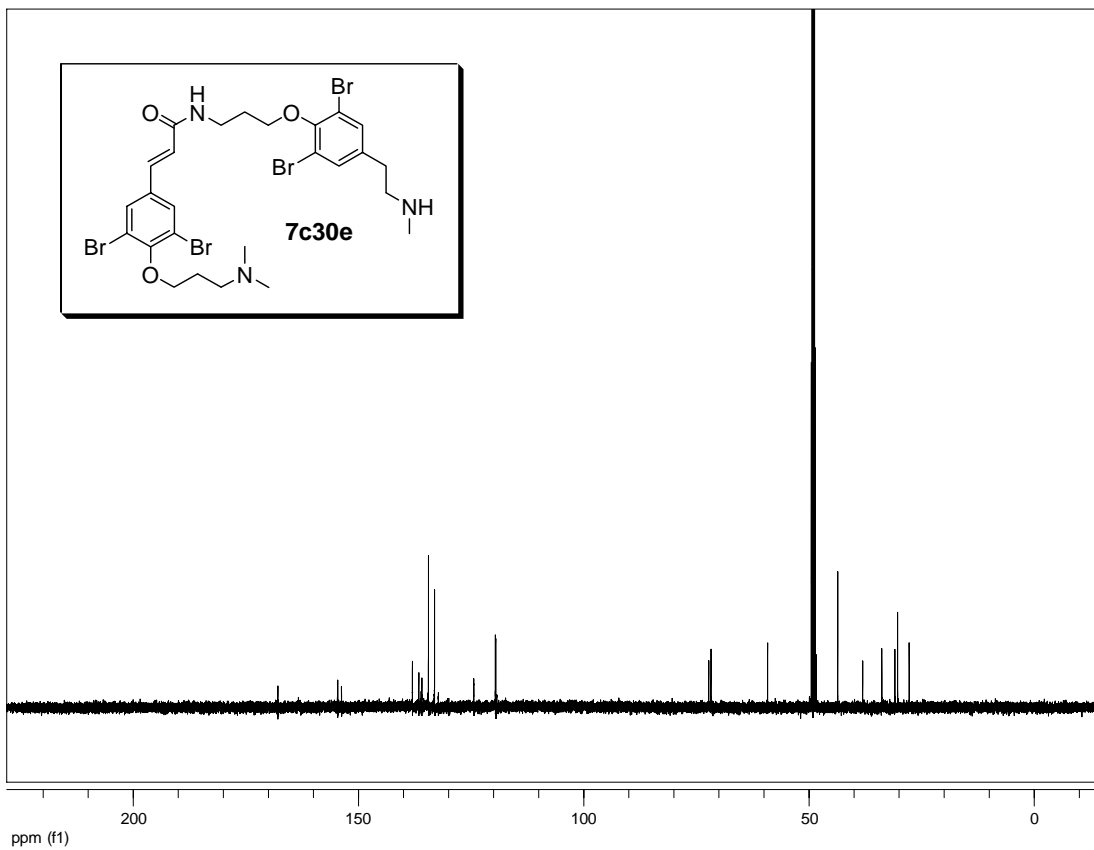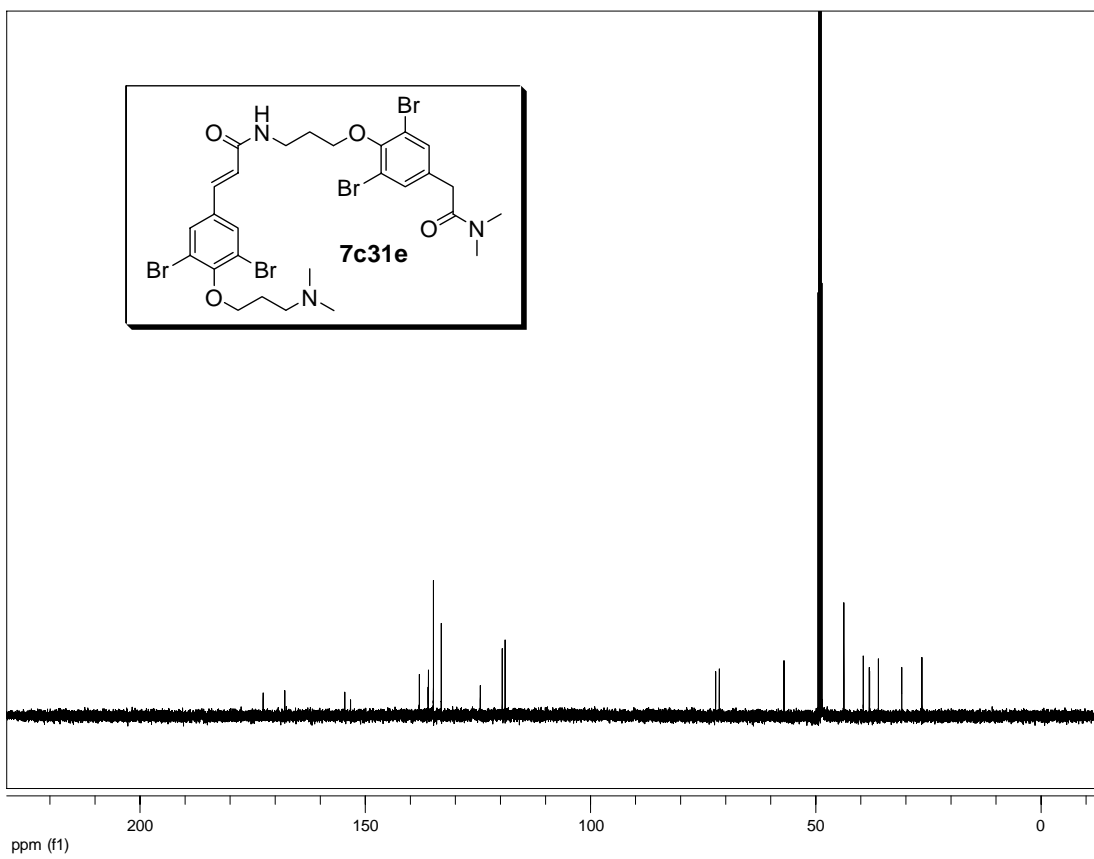



HMQC/HMBC-NMR SPECTRA OF FINAL PRODUCTS PREPARED ON SMALL SCALE

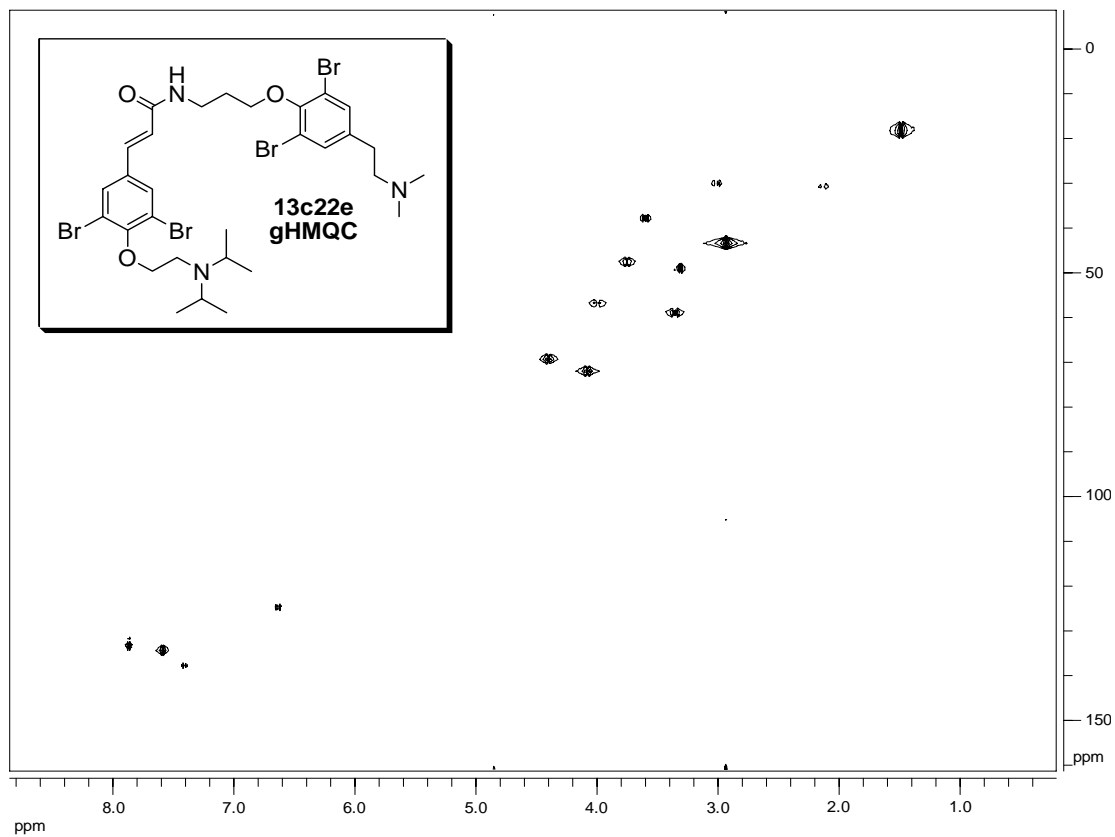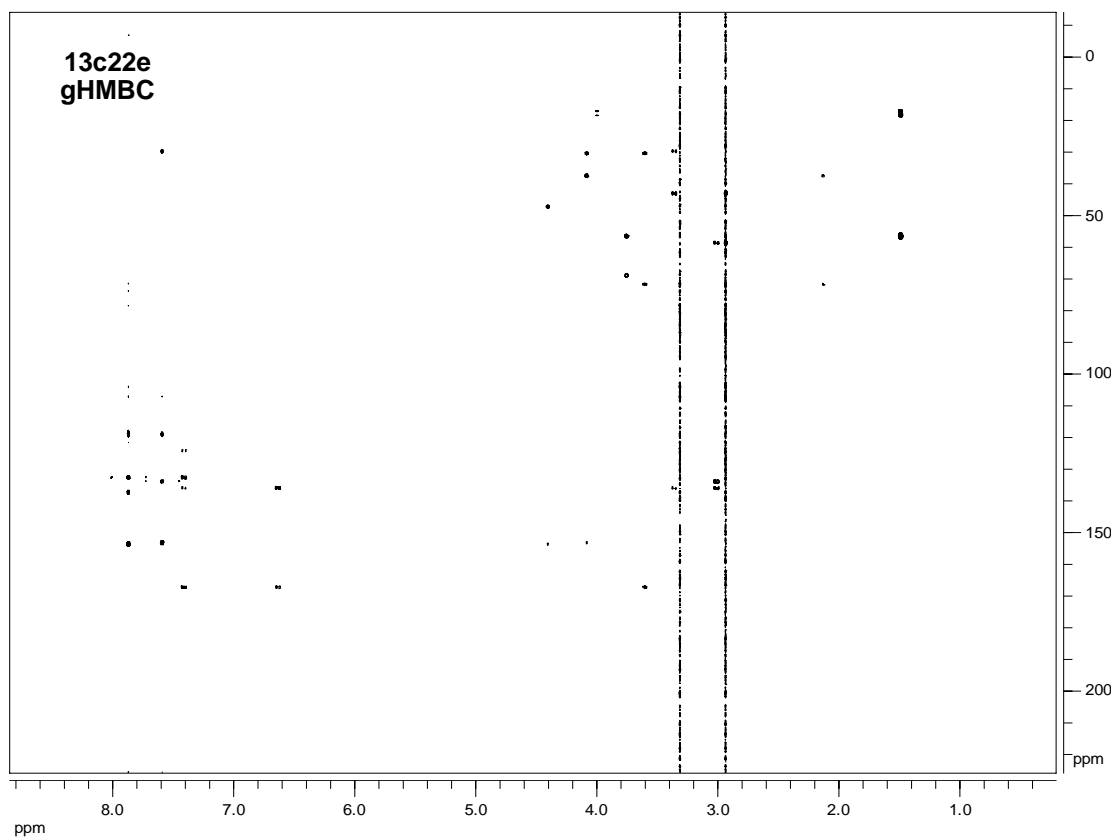

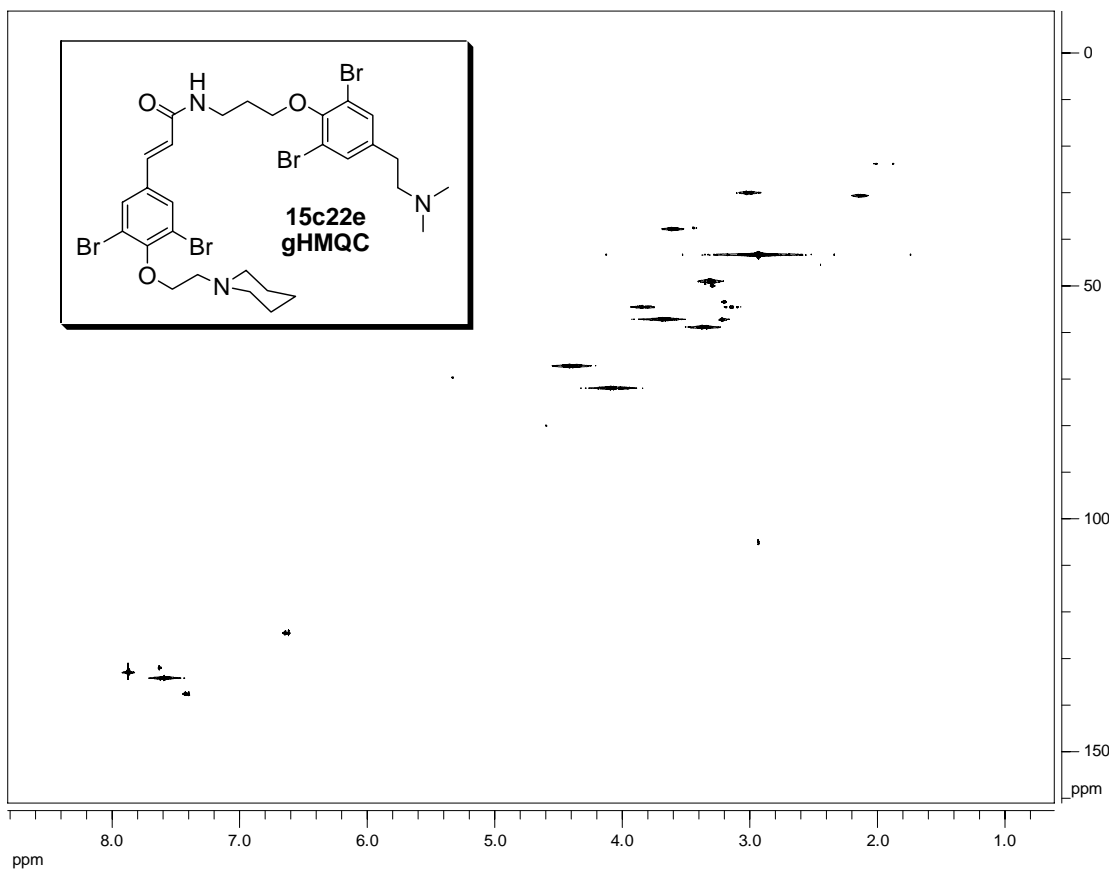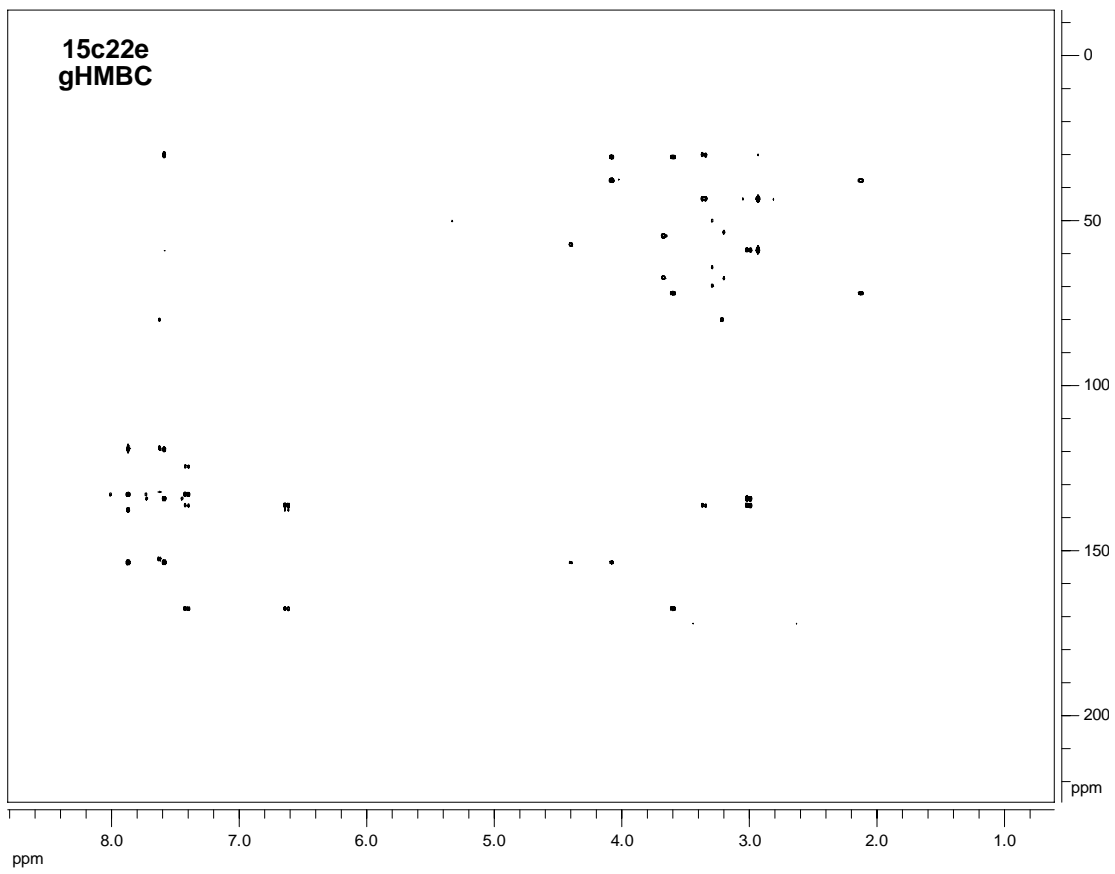

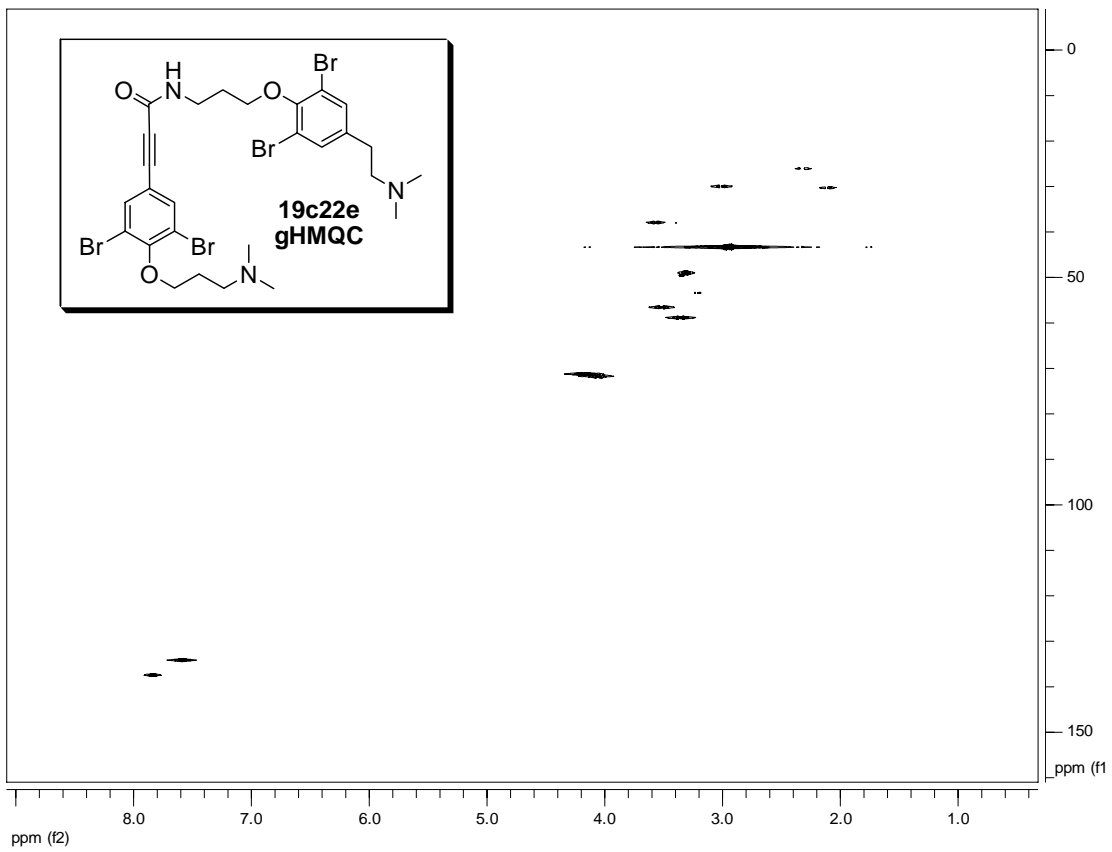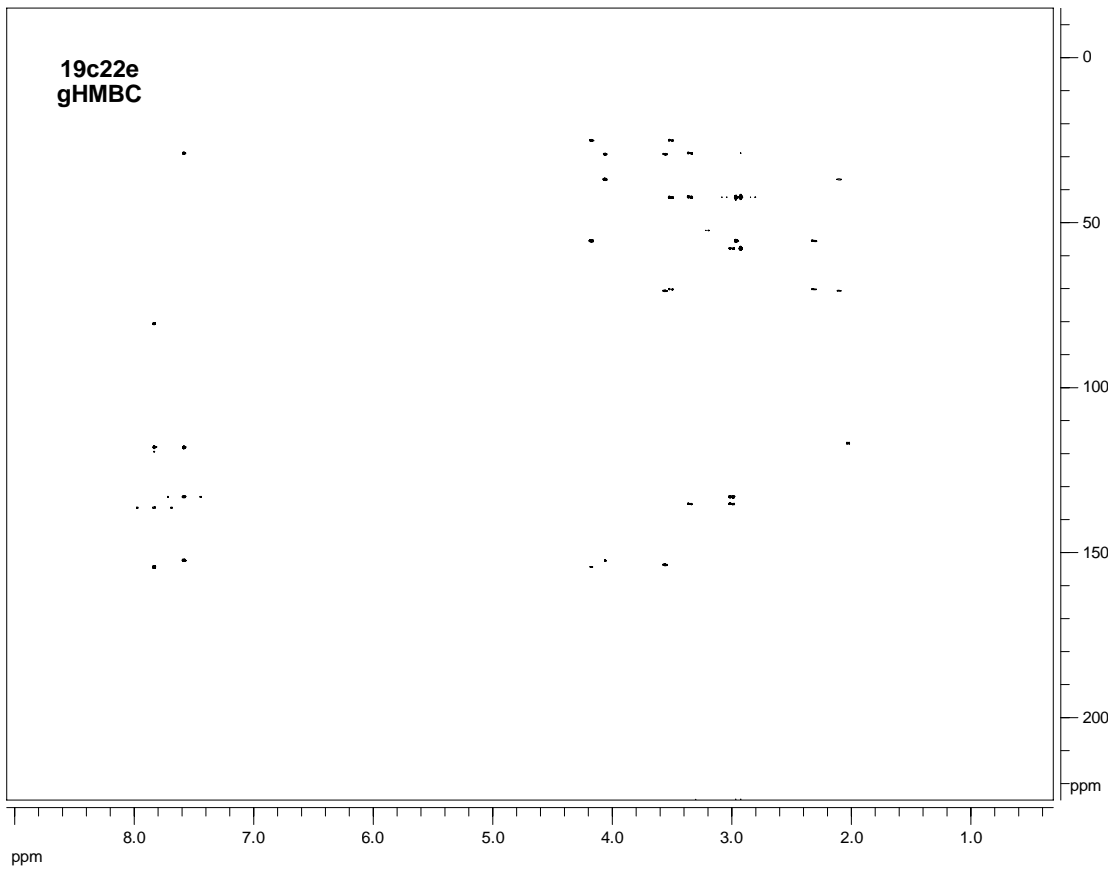



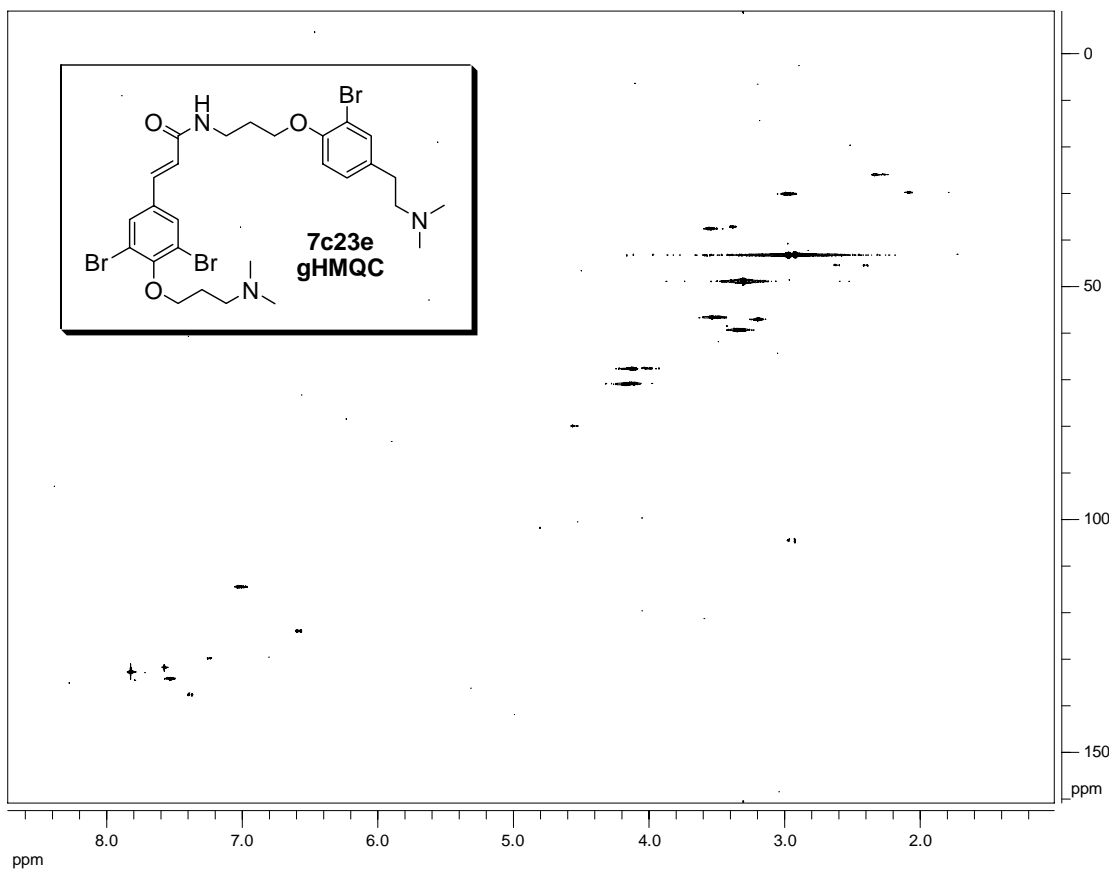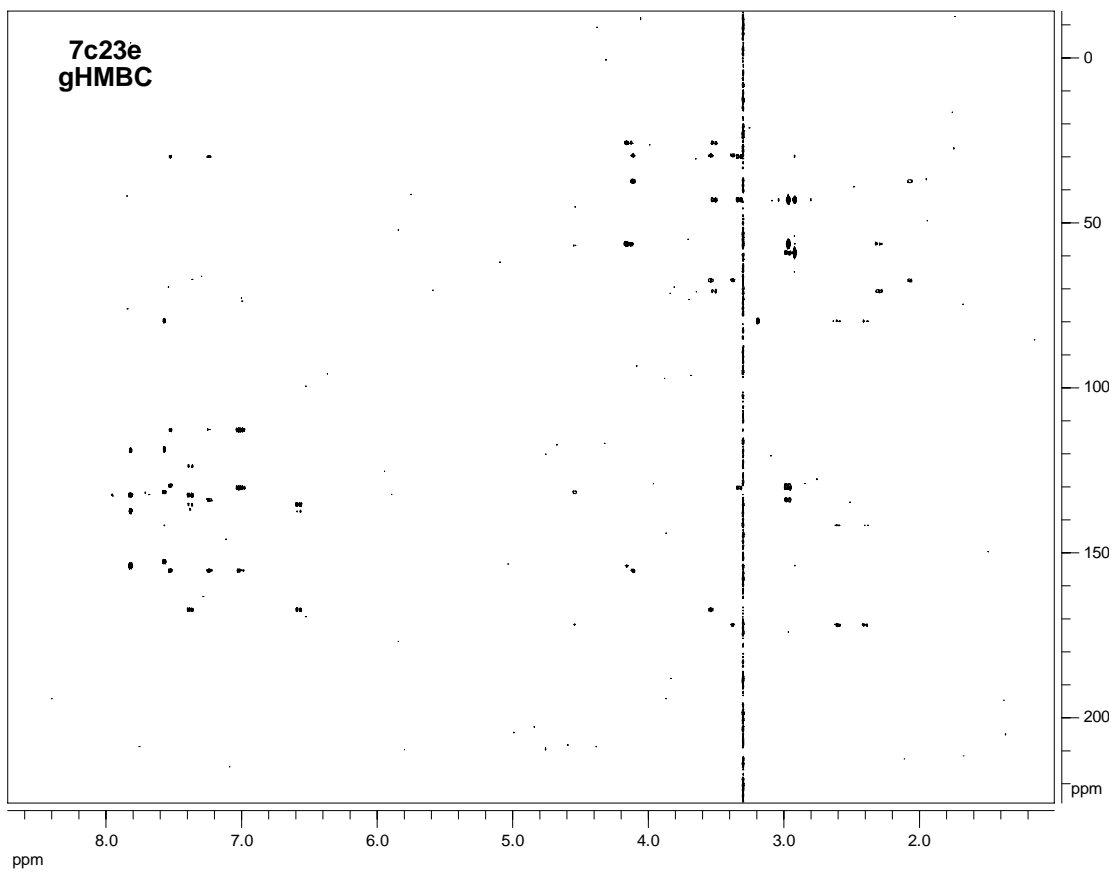

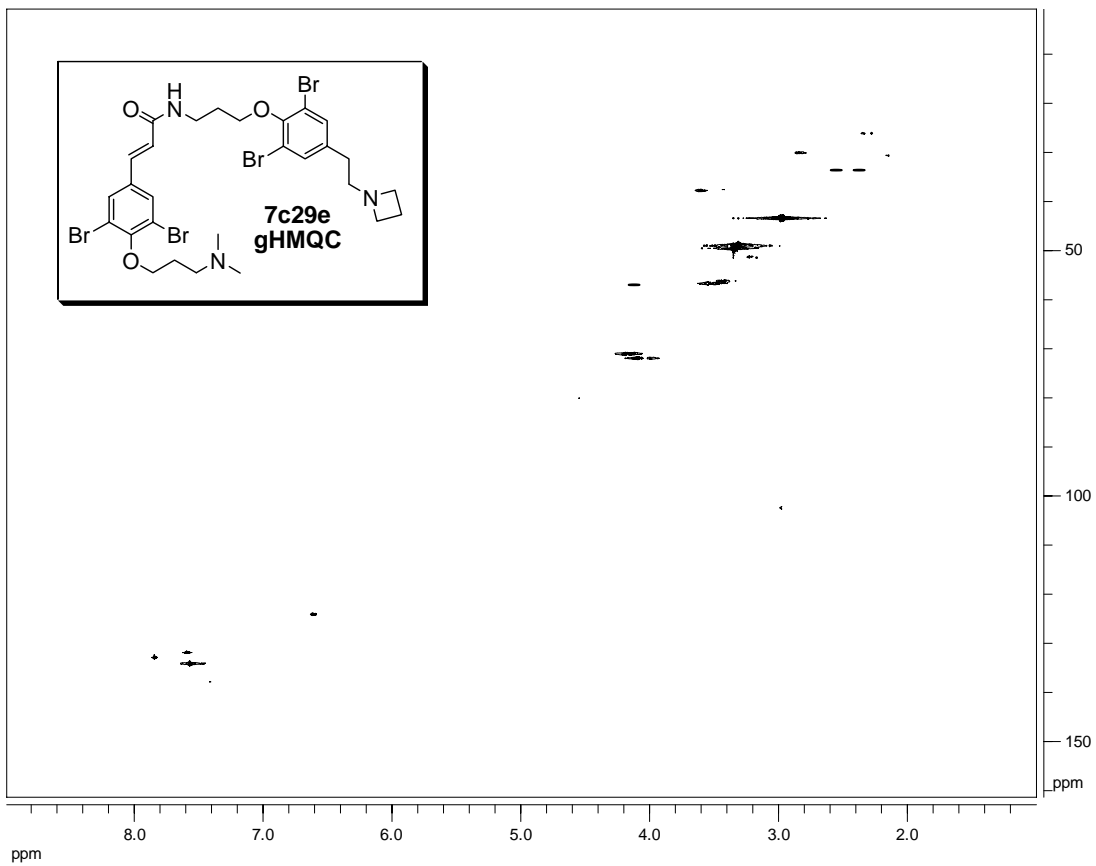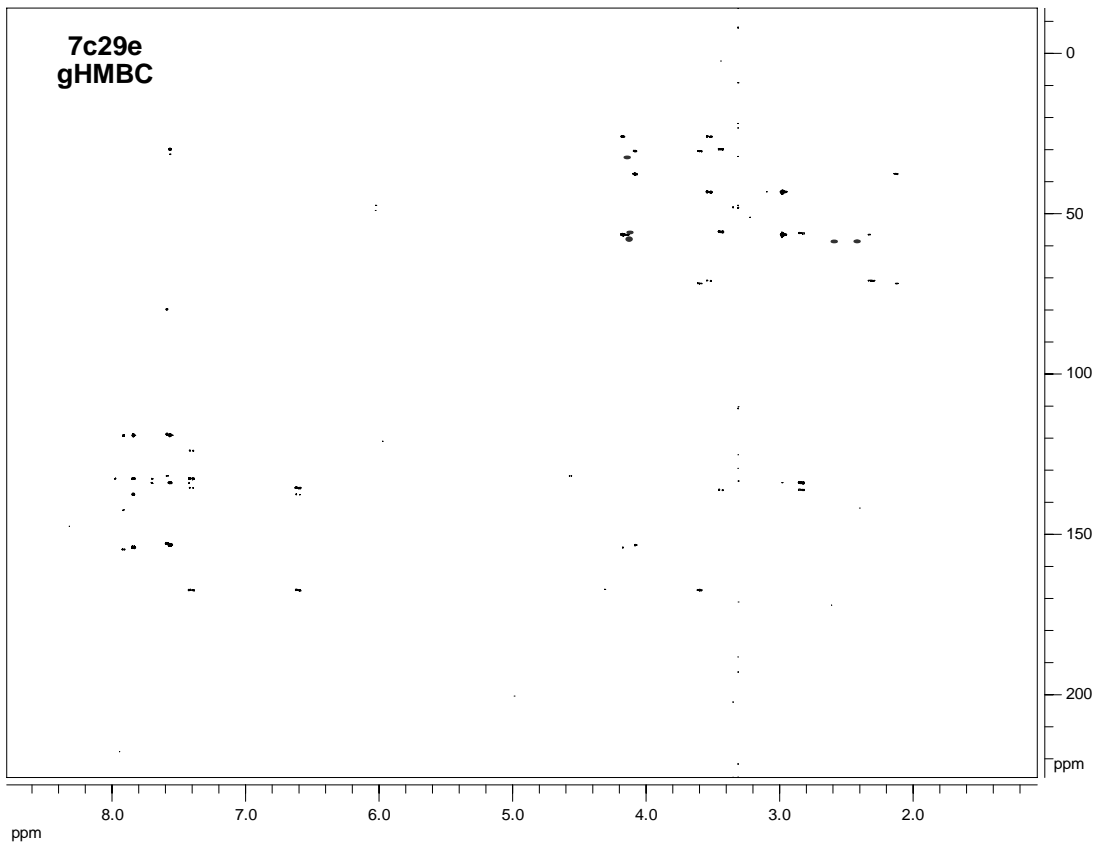

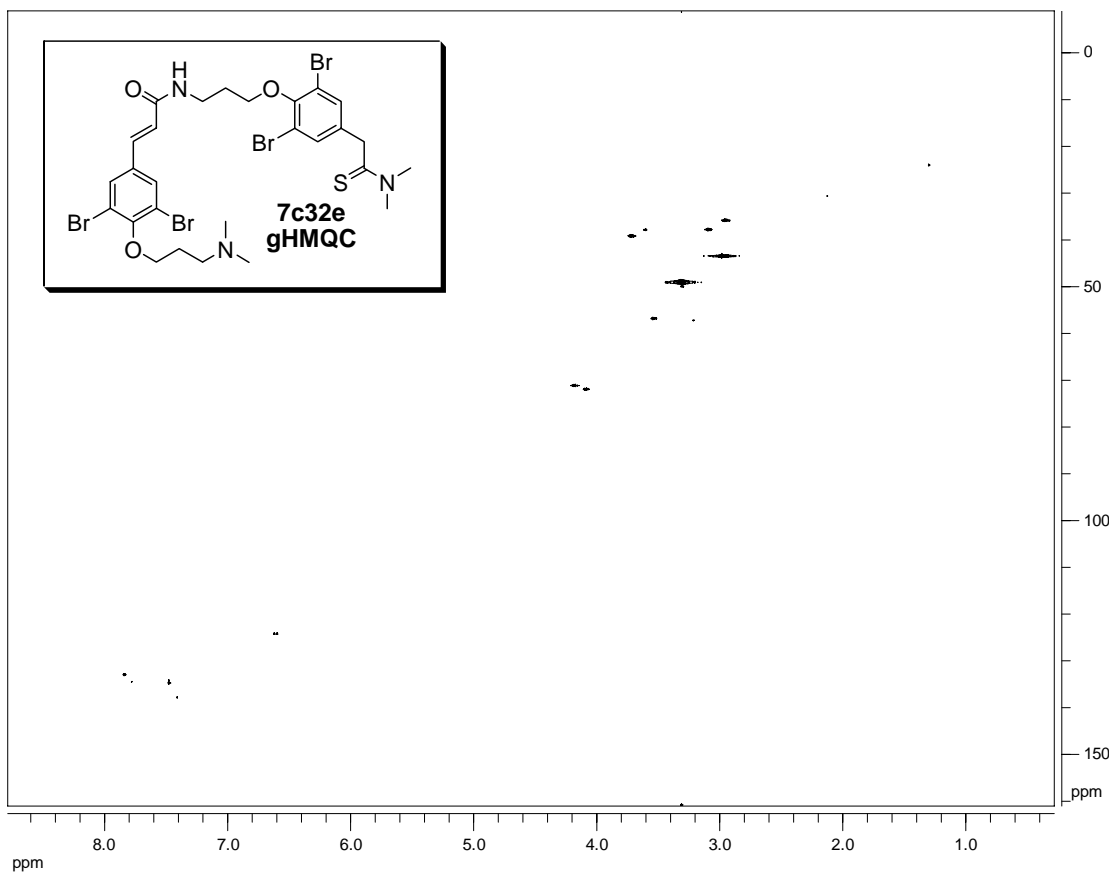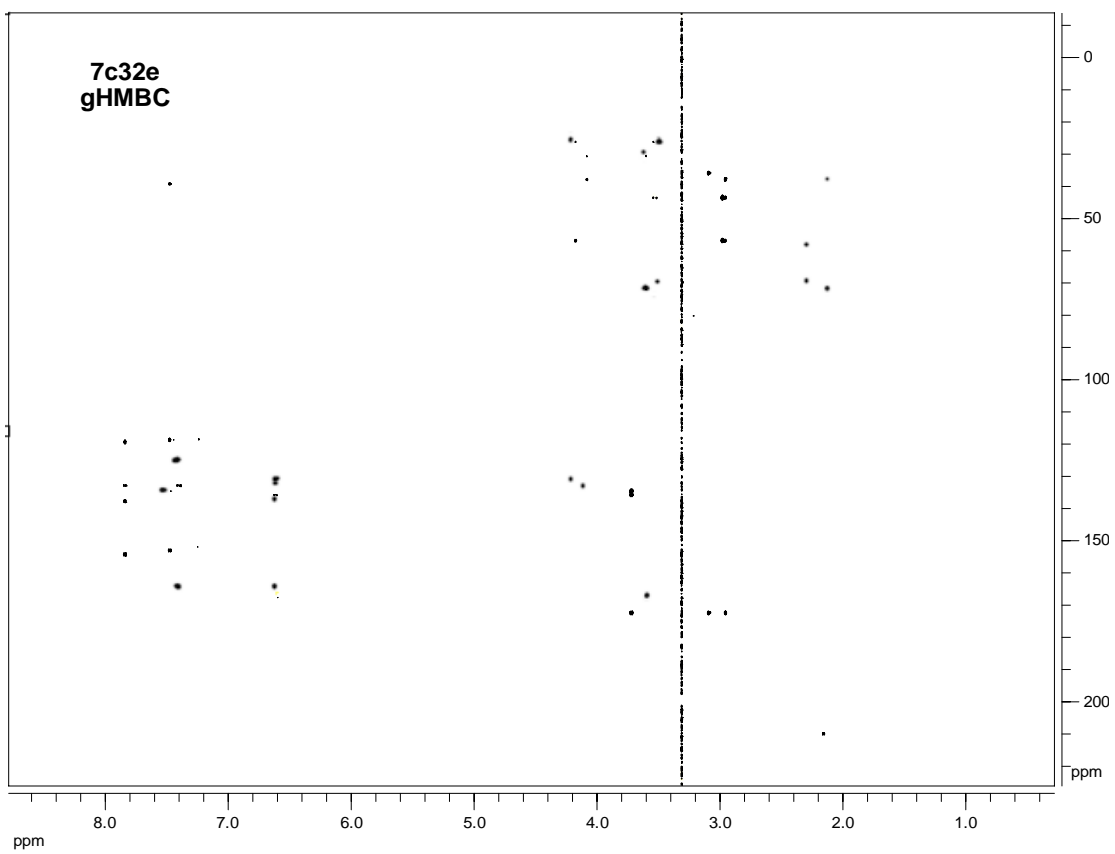

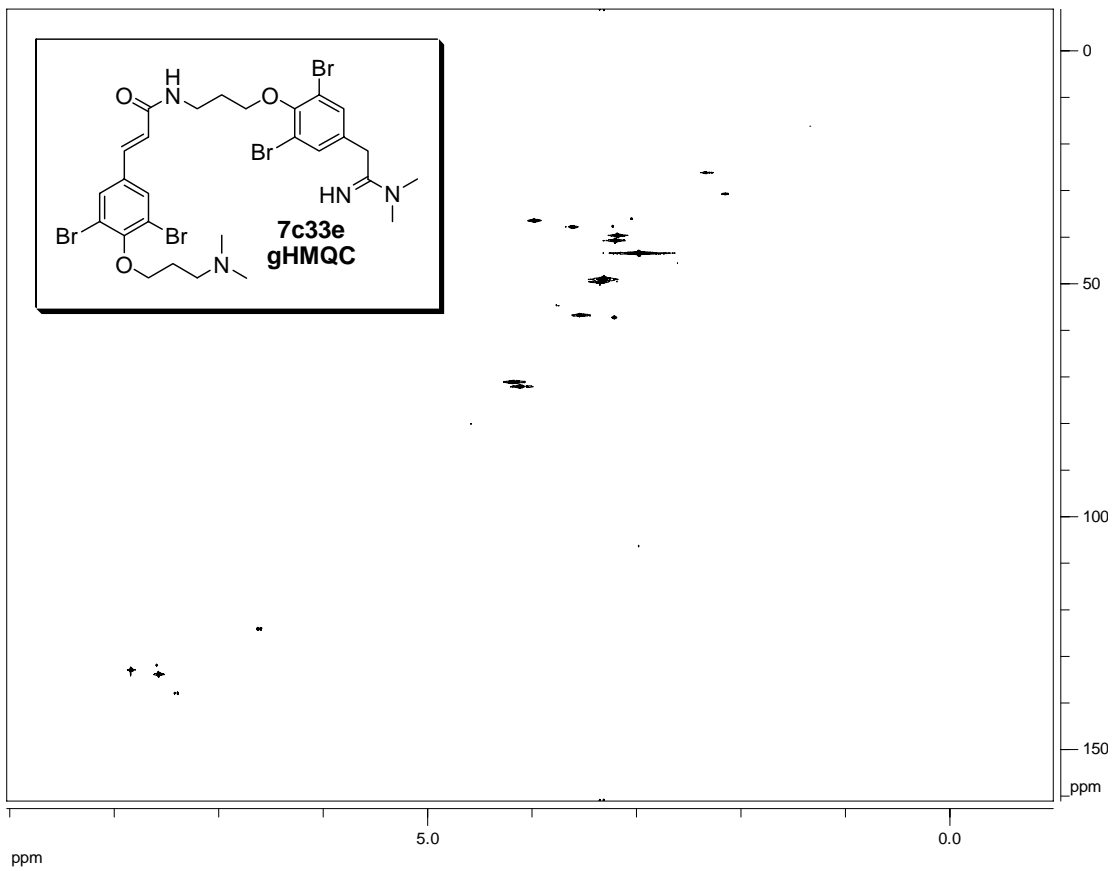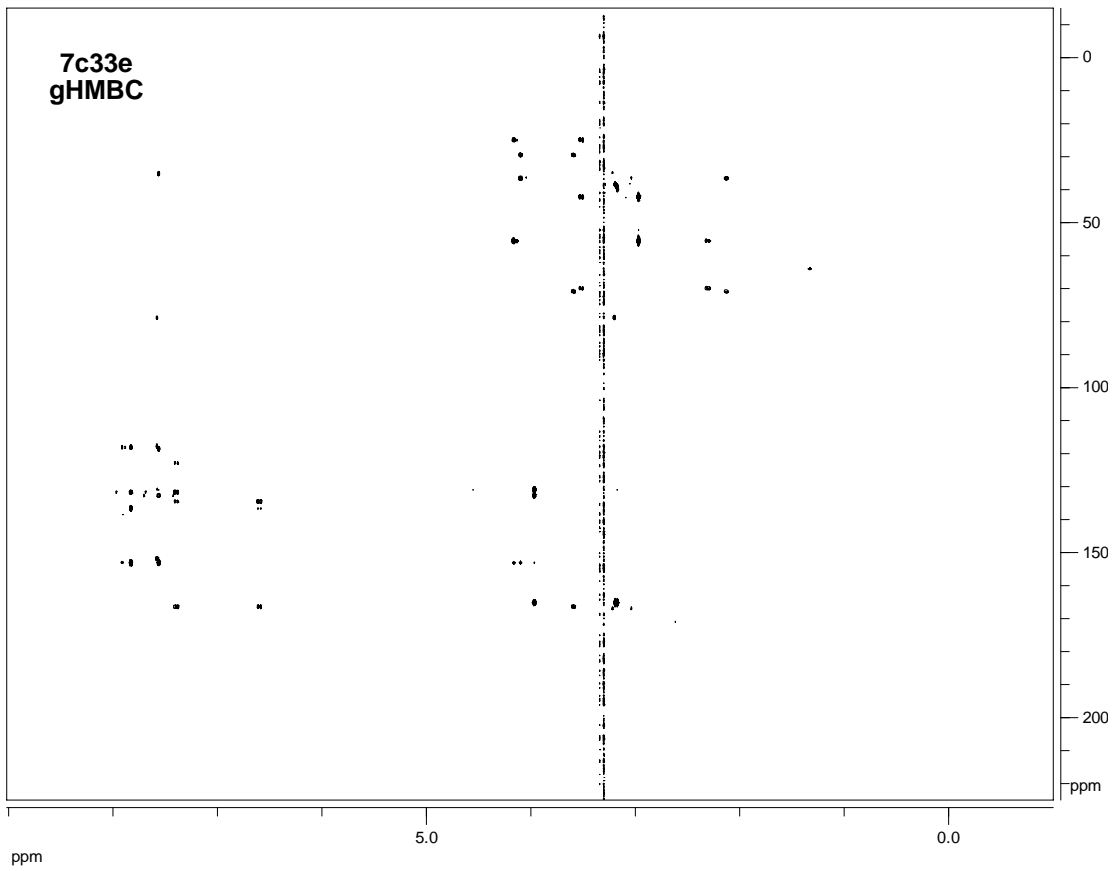

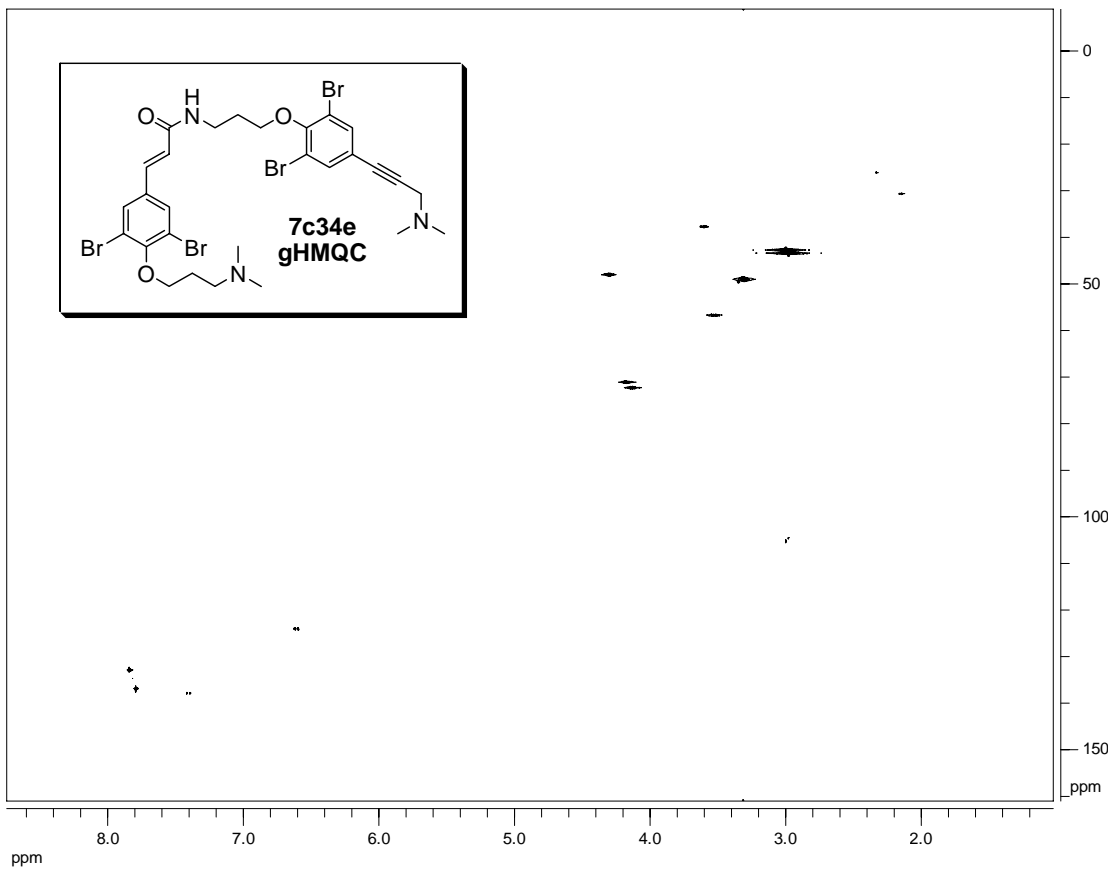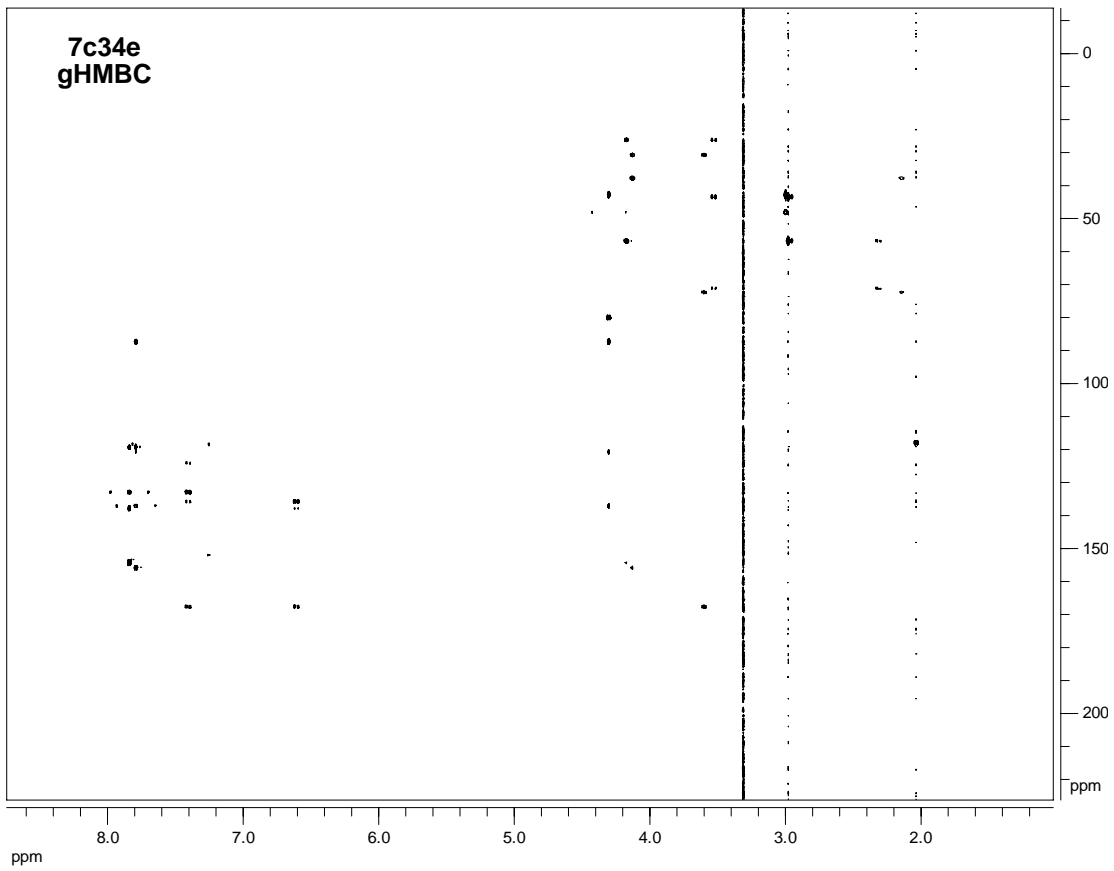

Supplement: NIHMS63811-supplement-2si20060803_02.pdf [file NIHMS63811-supplement-2si20060803_02.pdf]
